# Supplementary material for: Stereoselective synthesis of amino-substituted cyclopentafullerenes promoted by magnesium perchlorate/ferric perchlorate
Source: Royal Society of Chemistry journal article supplement (doi:10.1039/c9ob02248a), 2020-01-01

# Electronic Supplementary Information

## Stereoselective synthesis of amino-substituted cyclopentafullerenes promoted by magnesium perchlorate/ferric perchlorate

Wan Ma,<sup>‡a</sup> Kun Wang,<sup>‡a</sup> Cheng Huang,<sup>‡a</sup> Hui-Juan Wang,<sup>b</sup> Fa-Bao Li,<sup>\*a</sup> Rui Sun,<sup>a</sup>  
Li Liu,<sup>a</sup> Chao-Yang Liu,<sup>\*b</sup> and Abdullah M. Asiri<sup>c</sup>

<sup>a</sup> *Ministry of Education Key Laboratory for the Synthesis and Application of Organic Functional Molecules, Hubei Key Laboratory of Polymer Materials, Key Laboratory of Green Preparation and Application for Functional Materials, Ministry of Education, and School of Chemistry and Chemical Engineering, Hubei University, Wuhan 430062, People's Republic of China*

*E-mail: lfb0615@hubu.edu.cn*

<sup>b</sup> *State Key Laboratory of Magnetic Resonance and Atomic and Molecular Physics, Wuhan Center for Magnetic Resonance, Wuhan Institute of Physics and Mathematics, Chinese Academy of Sciences, Wuhan 430071, People's Republic of China*

*E-mail: chylliu@wipm.ac.cn*

<sup>c</sup> *Department of Chemistry, Faculty of Science, King Abdulaziz University, Jeddah 21589, Saudi Arabia*

*‡These authors contributed equally to this work.*

|                                                                     |         |
|---------------------------------------------------------------------|---------|
| Optimization of reaction conditions for arylamines/secondary amines | S4-S6   |
| NOESY spectra of <i>trans/cis-3ad</i> and <i>trans/cis-3ba</i>      | S7-S8   |
| <sup>1</sup> H NMR spectra for reaction mixture                     | S9      |
| Experimental details and spectra data                               | S10-S33 |
| Typical MALDI-TOF MS of cyclopentafullerenes                        | S34-S35 |
| Typical UV-vis spectra of cyclopentafullerenes                      | S36     |
| <sup>1</sup> H NMR spectrum of compound <i>trans-3aa</i>            | S37     |
| <sup>13</sup> C NMR spectrum of compound <i>trans-3aa</i>           | S37-S38 |
| <sup>1</sup> H NMR spectrum of compound <i>cis-3aa</i>              | S38     |
| <sup>13</sup> C NMR spectrum of compound <i>cis-3aa</i>             | S39     |
| <sup>1</sup> H NMR spectrum of compound <i>trans-3ab</i>            | S40     |
| <sup>13</sup> C NMR spectrum of compound <i>trans-3ab</i>           | S40-S41 |
| <sup>1</sup> H NMR spectrum of compound <i>cis-3ab</i>              | S41     |
| <sup>13</sup> C NMR spectrum of compound <i>cis-3ab</i>             | S42     |
| <sup>1</sup> H NMR spectrum of compound <i>trans/cis-3ac</i>        | S43     |
| NOESY spectrum of <i>trans/cis-3ac</i>                              | S43     |
| <sup>13</sup> C NMR spectrum of compound <i>trans/cis-3ac</i>       | S44     |
| <sup>1</sup> H NMR spectrum of compound <i>trans-3ad</i>            | S45     |
| <sup>13</sup> C NMR spectrum of compound <i>trans-3ad</i>           | S45-S46 |
| <sup>1</sup> H NMR spectrum of compound <i>cis-3ad</i>              | S46     |
| <sup>13</sup> C NMR spectrum of compound <i>cis-3ad</i>             | S47     |
| <sup>1</sup> H NMR spectrum of compound <i>trans-3ae</i>            | S48     |
| <sup>13</sup> C NMR spectrum of compound <i>trans-3ae</i>           | S48-S49 |
| <sup>1</sup> H NMR spectrum of compound <i>cis-3ae</i>              | S49     |
| <sup>13</sup> C NMR spectrum of compound <i>cis-3ae</i>             | S50     |
| <sup>1</sup> H NMR spectrum of compound <i>trans-3af</i>            | S51     |
| <sup>13</sup> C NMR spectrum of compound <i>trans-3af</i>           | S51-S52 |
| <sup>1</sup> H NMR spectrum of compound <i>cis-3af</i>              | S52     |
| <sup>13</sup> C NMR spectrum of compound <i>cis-3af</i>             | S53     |
| <sup>1</sup> H NMR spectrum of compound <i>trans-3ba</i>            | S54     |
| <sup>13</sup> C NMR spectrum of compound <i>trans-3ba</i>           | S54-S55 |
| <sup>1</sup> H NMR spectrum of compound <i>cis-3ba</i>              | S55     |
| <sup>13</sup> C NMR spectrum of compound <i>cis-3ba</i>             | S56     |
| <sup>1</sup> H NMR spectrum of compound <i>trans-3ca</i>            | S57     |
| <sup>13</sup> C NMR spectrum of compound <i>trans-3ca</i>           | S57-S58 |
| <sup>1</sup> H NMR spectrum of compound <i>cis-3ca</i>              | S58     |
| <sup>13</sup> C NMR spectrum of compound <i>cis-3ca</i>             | S59     |
| <sup>1</sup> H NMR spectrum of compound <i>trans/cis-3da</i>        | S60     |
| <sup>13</sup> C NMR spectrum of compound <i>trans/cis-3da</i>       | S60-S61 |
| <sup>1</sup> H NMR spectrum of compound <i>cis-5aa</i>              | S61     |
| <sup>13</sup> C NMR spectrum of compound <i>cis-5aa</i>             | S62     |
| <sup>1</sup> H NMR spectrum of compound <i>cis-5ab</i>              | S63     |
| <sup>13</sup> C NMR spectrum of compound <i>cis-5ab</i>             | S63-S64 |

|                                                                   |         |
|-------------------------------------------------------------------|---------|
| <sup>1</sup> H NMR spectrum of compound <i>cis-5ac</i>            | S64     |
| <sup>13</sup> C NMR spectrum of compound <i>cis-5ac</i>           | S65     |
| <sup>1</sup> H NMR spectrum of compound <i>cis-5ad</i>            | S66     |
| <sup>13</sup> C NMR spectrum of compound <i>cis-5ad</i>           | S66-S67 |
| <sup>1</sup> H NMR spectrum of compound <i>cis-5ae</i>            | S67     |
| <sup>13</sup> C NMR spectrum of compound <i>cis-5ae</i>           | S68     |
| <sup>1</sup> H NMR spectrum of compound <i>cis-5af</i>            | S69     |
| <sup>13</sup> C NMR spectrum of compound <i>cis-5af</i>           | S69-S70 |
| <sup>1</sup> H NMR spectrum of compound <i>cis-5ag</i>            | S70     |
| <sup>13</sup> C NMR spectrum of compound <i>cis-5ag</i>           | S71     |
| <sup>1</sup> H NMR spectrum of compound <i>cis-5ba</i>            | S72     |
| <sup>13</sup> C NMR spectrum of compound <i>cis-5ba</i>           | S72-S73 |
| <sup>1</sup> H NMR spectrum of compound <i>cis-5ca</i>            | S73     |
| <sup>13</sup> C NMR spectrum of compound <i>cis-5ca</i>           | S74     |
| <sup>1</sup> H NMR spectrum of compound <i>trans-6aa</i>          | S75     |
| <sup>13</sup> C NMR spectrum of compound <i>trans-6aa</i>         | S75-S76 |
| <sup>1</sup> H NMR spectrum of compound <i>trans-6ad</i>          | S76     |
| <sup>13</sup> C NMR spectrum of compound <i>trans-6ad</i>         | S77     |
| <sup>1</sup> H NMR spectrum of compound <i>trans-6ae</i>          | S78     |
| <sup>13</sup> C NMR spectrum of compound <i>trans-6ae</i>         | S78-S79 |
| <sup>1</sup> H NMR spectrum of compound <i>trans-6ca</i>          | S79     |
| <sup>13</sup> C NMR spectrum of compound <i>trans-6ca</i>         | S80     |
| <sup>1</sup> H NMR spectrum of compound <i>cis-7</i>              | S81     |
| <sup>13</sup> C NMR spectrum of compound <i>cis-7</i>             | S81-S82 |
| <sup>1</sup> H NMR spectrum of compound <i>cis/trans-ortho-8</i>  | S82     |
| NOESY spectrum of <i>cis/trans-ortho-8</i>                        | S83     |
| <sup>13</sup> C NMR spectrum of compound <i>cis/trans-ortho-8</i> | S83-S84 |

## Optimization of reaction conditions for arylamines/secondary amines

**Table S1** Optimization of reaction conditions for the reaction of C<sub>60</sub> with cinnamaldehyde **1a** and aniline **2a**<sup>a</sup>

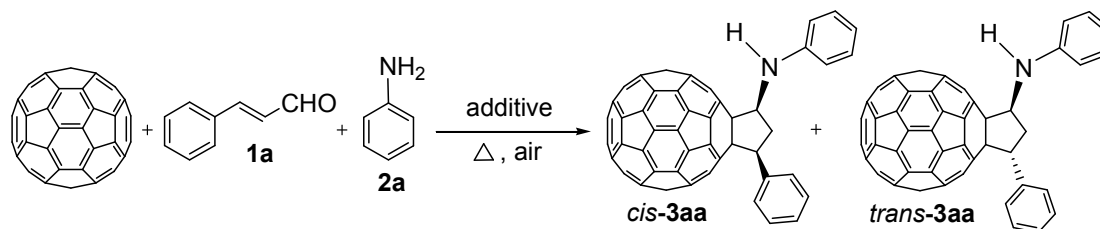

| Entry           | Additive                                              | Molar ratio <sup>b</sup> | Temp. (°C) | Time (min) | Yield (%) of <i>cis</i> - <b>3aa</b> <sup>c</sup> | Yield (%) of <i>trans</i> - <b>3aa</b> <sup>c</sup> |
|-----------------|-------------------------------------------------------|--------------------------|------------|------------|---------------------------------------------------|-----------------------------------------------------|
| 1               | Mg(ClO <sub>4</sub> ) <sub>2</sub>                    | 1:5:5:1                  | 180        | 120        | 15 (68)                                           | 6 (27)                                              |
| 2               | Mg(ClO <sub>4</sub> ) <sub>2</sub>                    | 1:10:10:1                | 180        | 60         | 16 (52)                                           | 13 (42)                                             |
| 3               | Mg(ClO <sub>4</sub> ) <sub>2</sub>                    | 1:20:20:1                | 180        | 40         | 12 (50)                                           | 11 (46)                                             |
| 4               | Mg(ClO <sub>4</sub> ) <sub>2</sub>                    | 1:10:10:3                | 180        | 30         | 22 (54)                                           | 18 (44)                                             |
| 5               | <b>Mg(ClO<sub>4</sub>)<sub>2</sub></b>                | <b>1:10:10:4</b>         | <b>180</b> | <b>60</b>  | <b>33 (75)</b>                                    | <b>10 (23)</b>                                      |
| 6               | Mg(ClO <sub>4</sub> ) <sub>2</sub>                    | 1:10:10:5                | 180        | 40         | 26 (74)                                           | 8 (23)                                              |
| 7               | Mg(ClO <sub>4</sub> ) <sub>2</sub>                    | 1:15:10:4                | 180        | 40         | 27 (59)                                           | 16 (35)                                             |
| 8               | Mg(ClO <sub>4</sub> ) <sub>2</sub>                    | 1:5:10:4                 | 180        | 120        | 2 (20)                                            | trace                                               |
| 9               | Mg(ClO <sub>4</sub> ) <sub>2</sub>                    | 1:10:15:4                | 180        | 30         | 22 (56)                                           | 15 (38)                                             |
| 10              | Mg(ClO <sub>4</sub> ) <sub>2</sub>                    | 1:10:5:4                 | 180        | 60         | 11 (61)                                           | 4 (22)                                              |
| 11              | Mg(ClO <sub>4</sub> ) <sub>2</sub>                    | 1:10:10:4                | 160        | 70         | 20 (67)                                           | 9 (30)                                              |
| 12 <sup>d</sup> | Mg(ClO <sub>4</sub> ) <sub>2</sub>                    | 1:10:10:4                | 180        | 90         | 32 (78)                                           | 8 (20)                                              |
| 13              | AlCl <sub>3</sub>                                     | 1:10:10:4                | 180        | 60         | 8 (36)                                            | 3 (14)                                              |
| 14              | Fe(ClO <sub>4</sub> ) <sub>3</sub> ·xH <sub>2</sub> O | 1:10:10:4                | 180        | 90         | 0                                                 | 0                                                   |
| 15              | Mn(OAc) <sub>3</sub> ·2H <sub>2</sub> O               | 1:10:10:4                | 180        | 150        | 0                                                 | 0                                                   |
| 16              | CuCl <sub>2</sub>                                     | 1:10:10:4                | 180        | 120        | 0                                                 | 0                                                   |
| 17              | Cu(OAc) <sub>2</sub>                                  | 1:10:10:4                | 180        | 120        | 0                                                 | 0                                                   |

<sup>a</sup>Unless otherwise indicated, all reactions were performed in *o*-dichlorobenzene (ODCB) under air conditions. <sup>b</sup>Molar ratio refers to C<sub>60</sub>/**1a**/**2a**/additive. <sup>c</sup>Isolated yield; those in parentheses were based on consumed C<sub>60</sub>. <sup>d</sup>The reaction was conducted under nitrogen atmosphere.

**Table S2** Optimization of reaction conditions for the reaction of C<sub>60</sub> with cinnamaldehyde **1a** and diethylamine **4a**<sup>a</sup>

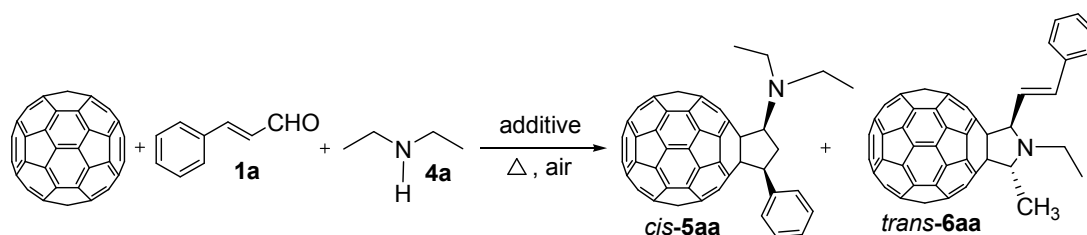

| Entry           | Additive                                                                                  | Molar ratio <sup>b</sup> | Temp<br>(°C) | Time<br>(min) | Yield (%) of<br><i>cis</i> - <b>5aa</b> <sup>c</sup> | Yield (%) of<br><i>trans</i> - <b>6aa</b> <sup>c</sup> |
|-----------------|-------------------------------------------------------------------------------------------|--------------------------|--------------|---------------|------------------------------------------------------|--------------------------------------------------------|
| 1               | Mg(ClO <sub>4</sub> ) <sub>2</sub>                                                        | 1:10:10:4:0              | 100          | 90            | 18 (58)                                              | 12 (39)                                                |
| 2               | Mg(ClO <sub>4</sub> ) <sub>2</sub>                                                        | 1:10:10:2:0              | 100          | 90            | 29 (55)                                              | 22 (42)                                                |
| 3               | Mg(ClO <sub>4</sub> ) <sub>2</sub>                                                        | 1:10:10:1:0              | 100          | 90            | 36 (55)                                              | 25 (38)                                                |
| 4               | Mg(ClO <sub>4</sub> ) <sub>2</sub>                                                        | 1:10:10:0.5:0            | 100          | 60            | 37 (63)                                              | 20 (34)                                                |
| 5               | Mg(ClO <sub>4</sub> ) <sub>2</sub>                                                        | 1:10:10:0.2:0            | 100          | 60            | 18 (40)                                              | 26 (58)                                                |
| 6               | Mg(ClO <sub>4</sub> ) <sub>2</sub> /Fe(ClO <sub>4</sub> ) <sub>3</sub> ·xH <sub>2</sub> O | 1:10:10:0.5:0.5          | 100          | 50            | 28 (53)                                              | 14 (26)                                                |
| 7               | Mg(ClO <sub>4</sub> ) <sub>2</sub> /Fe(ClO <sub>4</sub> ) <sub>3</sub> ·xH <sub>2</sub> O | 1:10:15:0.5:0.5          | 100          | 50            | 40 (59)                                              | 17 (25)                                                |
| 8               | Mg(ClO <sub>4</sub> ) <sub>2</sub> /Fe(ClO <sub>4</sub> ) <sub>3</sub> ·xH <sub>2</sub> O | 1:10:20:0.5:0.5          | 100          | 35            | 40 (70)                                              | 7 (12)                                                 |
| 9               | Mg(ClO <sub>4</sub> ) <sub>2</sub> /Fe(ClO <sub>4</sub> ) <sub>3</sub> ·xH <sub>2</sub> O | 1:10:25:0.5:0.5          | 100          | 30            | 38 (72)                                              | 7 (13)                                                 |
| 10              | Mg(ClO <sub>4</sub> ) <sub>2</sub> /Fe(ClO <sub>4</sub> ) <sub>3</sub> ·xH <sub>2</sub> O | 1:5:20:0.5:0.5           | 100          | 35            | 35 (81)                                              | 6 (14)                                                 |
| 11              | Mg(ClO <sub>4</sub> ) <sub>2</sub> /Fe(ClO <sub>4</sub> ) <sub>3</sub> ·xH <sub>2</sub> O | 1:15:20:0.5:0.5          | 100          | 15            | 31 (45)                                              | 18 (26)                                                |
| 12              | Mg(ClO <sub>4</sub> ) <sub>2</sub> /Fe(ClO <sub>4</sub> ) <sub>3</sub> ·xH <sub>2</sub> O | 1:10:20:0.5:0.2          | 100          | 20            | 32 (41)                                              | 12 (15)                                                |
| 13              | Mg(ClO <sub>4</sub> ) <sub>2</sub> /Fe(ClO <sub>4</sub> ) <sub>3</sub> ·xH <sub>2</sub> O | 1:10:20:0.5:1            | 100          | 40            | 40 (69)                                              | 9 (16)                                                 |
| 14              | <b>Mg(ClO<sub>4</sub>)<sub>2</sub>/Fe(ClO<sub>4</sub>)<sub>3</sub>·xH<sub>2</sub>O</b>    | <b>1:10:20:0.5:0.5</b>   | <b>80</b>    | <b>60</b>     | <b>40 (80)</b>                                       | <b>8 (16)</b>                                          |
| 15              | Mg(ClO <sub>4</sub> ) <sub>2</sub> /Fe(ClO <sub>4</sub> ) <sub>3</sub> ·xH <sub>2</sub> O | 1:10:20:0.5:0.5          | 60           | 110           | 15 (79)                                              | trace                                                  |
| 16 <sup>d</sup> | Mg(ClO <sub>4</sub> ) <sub>2</sub> /Fe(ClO <sub>4</sub> ) <sub>3</sub> ·xH <sub>2</sub> O | 1:10:20:0.5:0.5          | 80           | 60            | 39 (78)                                              | 8 (16)                                                 |
| 17              | Mg(ClO <sub>4</sub> ) <sub>2</sub>                                                        | 1:10:20:0.5:0            | 80           | 40            | 25 (76)                                              | 4 (12)                                                 |
| 18              | Fe(ClO <sub>4</sub> ) <sub>3</sub> ·xH <sub>2</sub> O                                     | 1:10:20:0:0.5            | 80           | 60            | 29 (35)                                              | 21 (25)                                                |
| 19              | Mg(ClO <sub>4</sub> ) <sub>2</sub> /CuCl <sub>2</sub>                                     | 1:10:20:0.5:0.5          | 80           | 60            | 18 (50)                                              | 10 (28)                                                |
| 20              | Mg(ClO <sub>4</sub> ) <sub>2</sub> /CuCl <sub>2</sub> ·H <sub>2</sub> O                   | 1:10:20:0.5:0.5          | 80           | 45            | 20 (65)                                              | 8 (26)                                                 |
| 21              | Mg(ClO <sub>4</sub> ) <sub>2</sub> /DMAP                                                  | 1:10:20:0.5:0.5          | 80           | 70            | 30 (51)                                              | 11 (19)                                                |
| 22 <sup>e</sup> | Mg(ClO <sub>4</sub> ) <sub>2</sub> /Fe(ClO <sub>4</sub> ) <sub>3</sub> ·xH <sub>2</sub> O | 1:10:20:0.5:0.5          | 80           | 60            | 39 (80)                                              | 5 (10)                                                 |
| 23 <sup>f</sup> | Mg(ClO <sub>4</sub> ) <sub>2</sub> /Fe(ClO <sub>4</sub> ) <sub>3</sub> ·xH <sub>2</sub> O | 1:10:20:0.5:0.5          | 80           | 60            | 22 (71)                                              | 6 (19)                                                 |

<sup>a</sup>Unless otherwise indicated, all reactions were performed in chlorobenzene under air conditions. <sup>b</sup>Molar ratio refers to C<sub>60</sub>/**1a**/**4a**/Mg(ClO<sub>4</sub>)<sub>2</sub>/other additive. <sup>c</sup>Isolated yield; those in parentheses were based on consumed C<sub>60</sub>. <sup>d</sup>The reaction was conducted under nitrogen atmosphere. <sup>e</sup>The reaction was carried out in *o*-dichlorobenzene (10 mL).

*f*The reaction was conducted in toluene (10 mL).

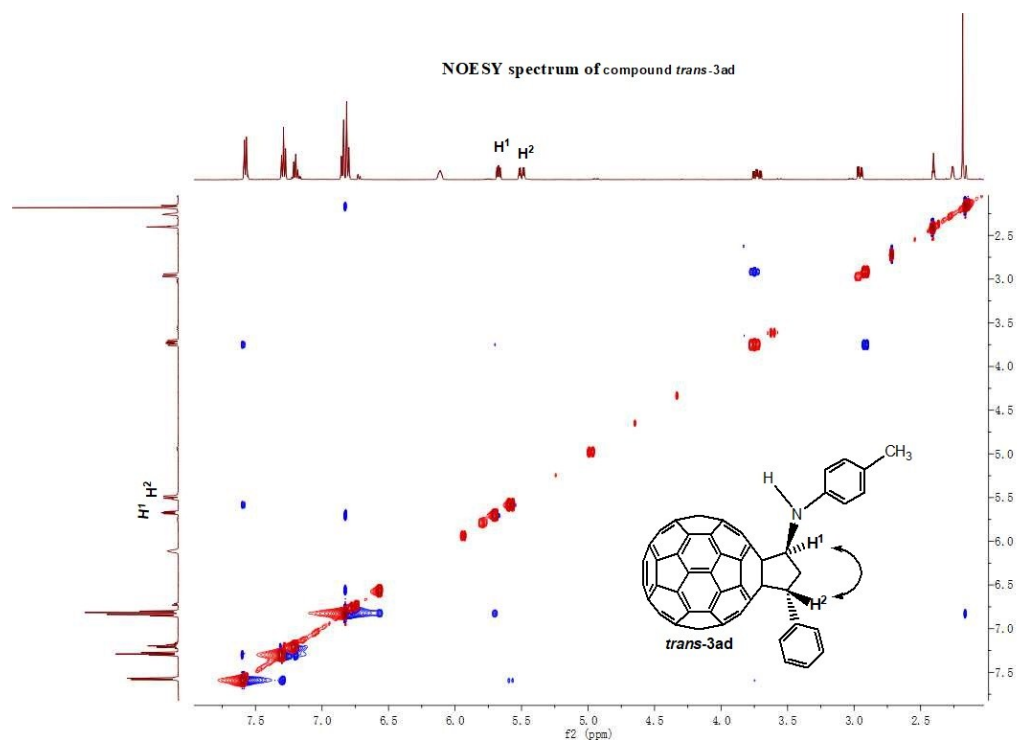

**Figure S1.** NOESY (500 MHz, CS<sub>2</sub>/DMSO-*d*<sub>6</sub>) spectrum of *trans*-3ad.

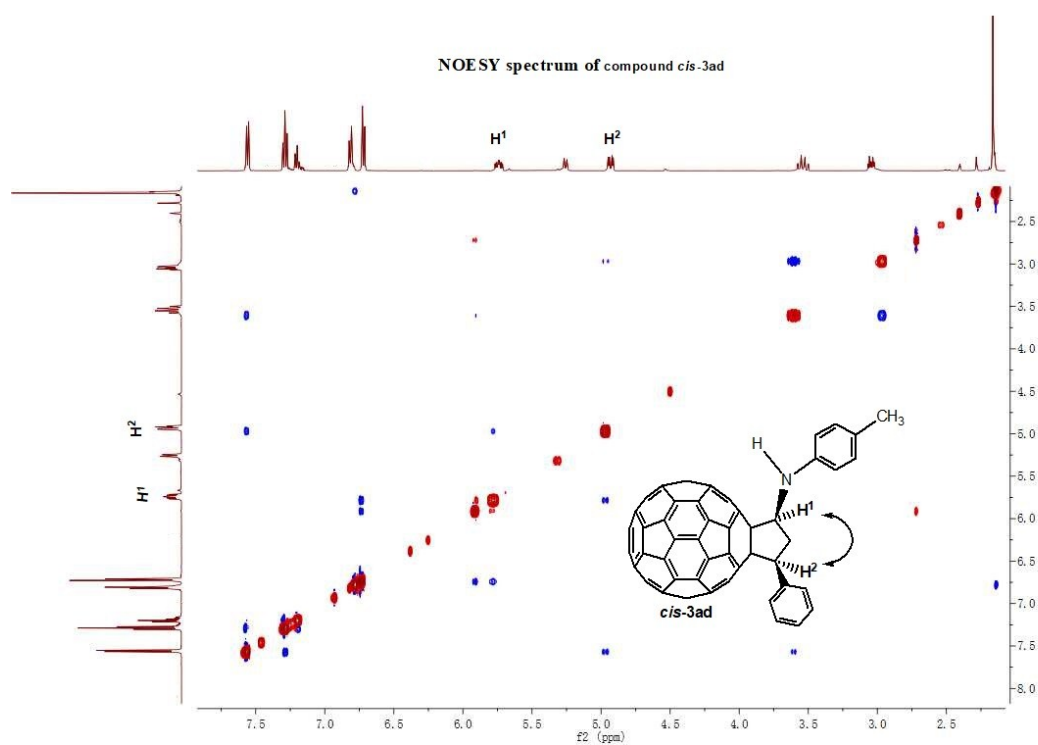

**Figure S2.** NOESY (500 MHz, CS<sub>2</sub>/DMSO-*d*<sub>6</sub>) spectrum of *cis*-3ad, and the nuclear Overhauser effect between the two methine protons is indicated by the curved arrow.

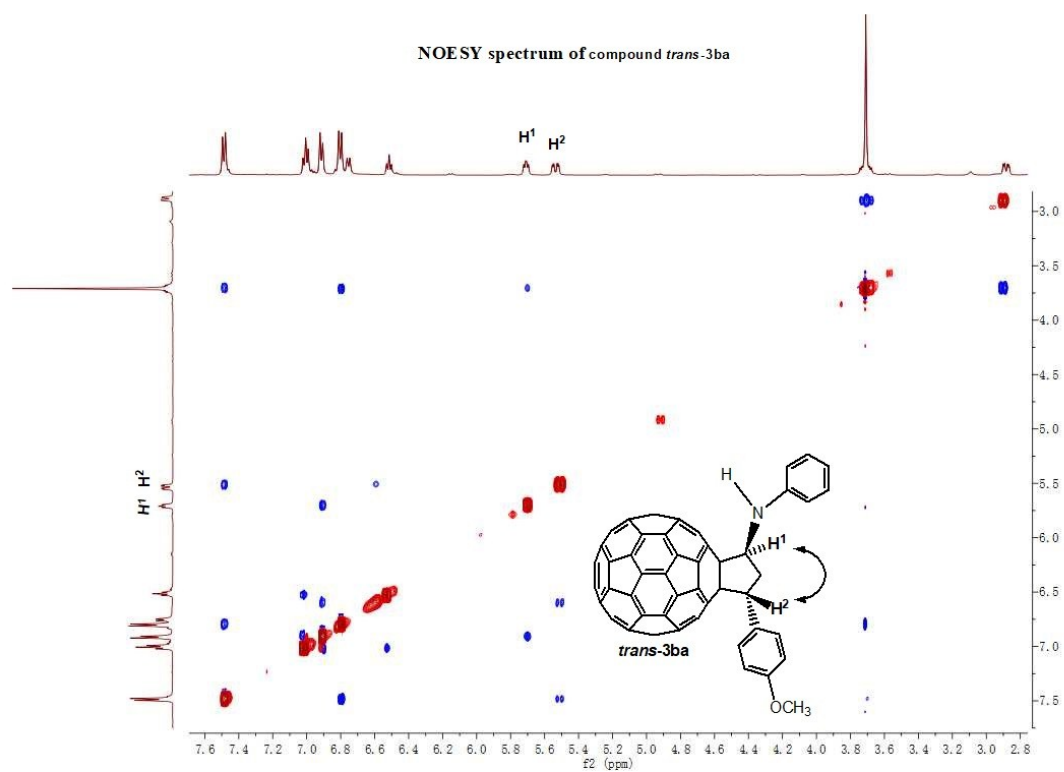

**Figure S3.** NOESY (500 MHz, CS<sub>2</sub>/DMSO-*d*<sub>6</sub>) spectrum of *trans*-3ba.

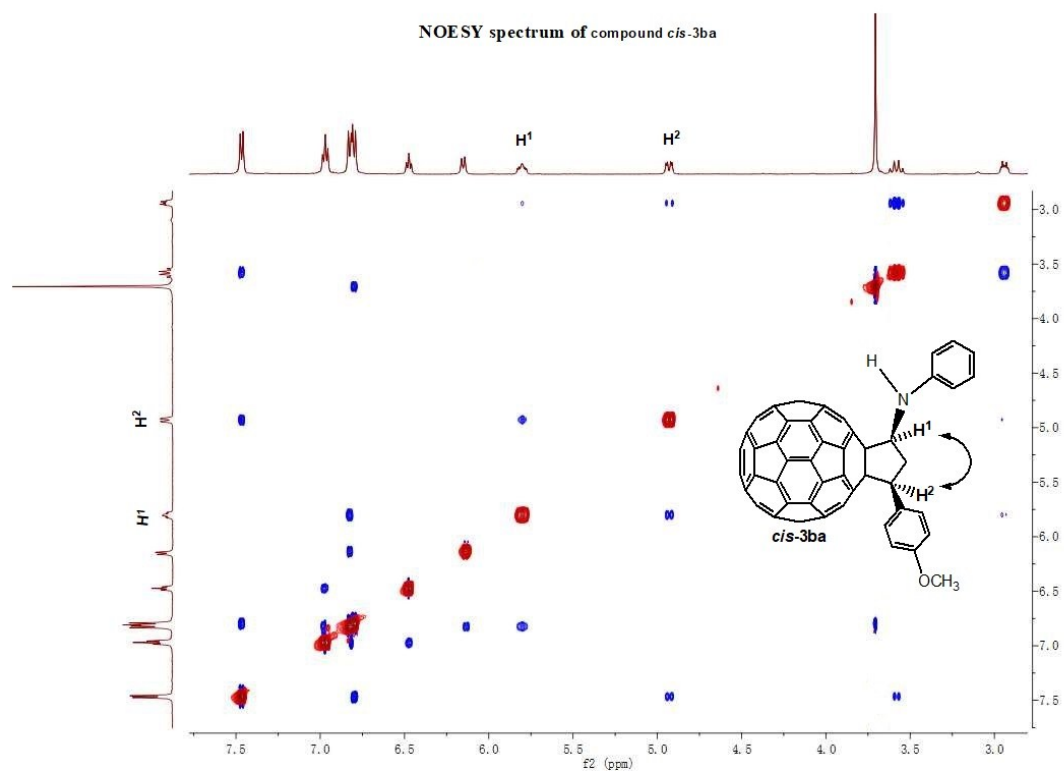

**Figure S4.** NOESY (500 MHz, CS<sub>2</sub>/DMSO-*d*<sub>6</sub>) spectrum of *cis*-3ba, and the nuclear Overhauser effect between the two methine protons is indicated by the curved arrow.



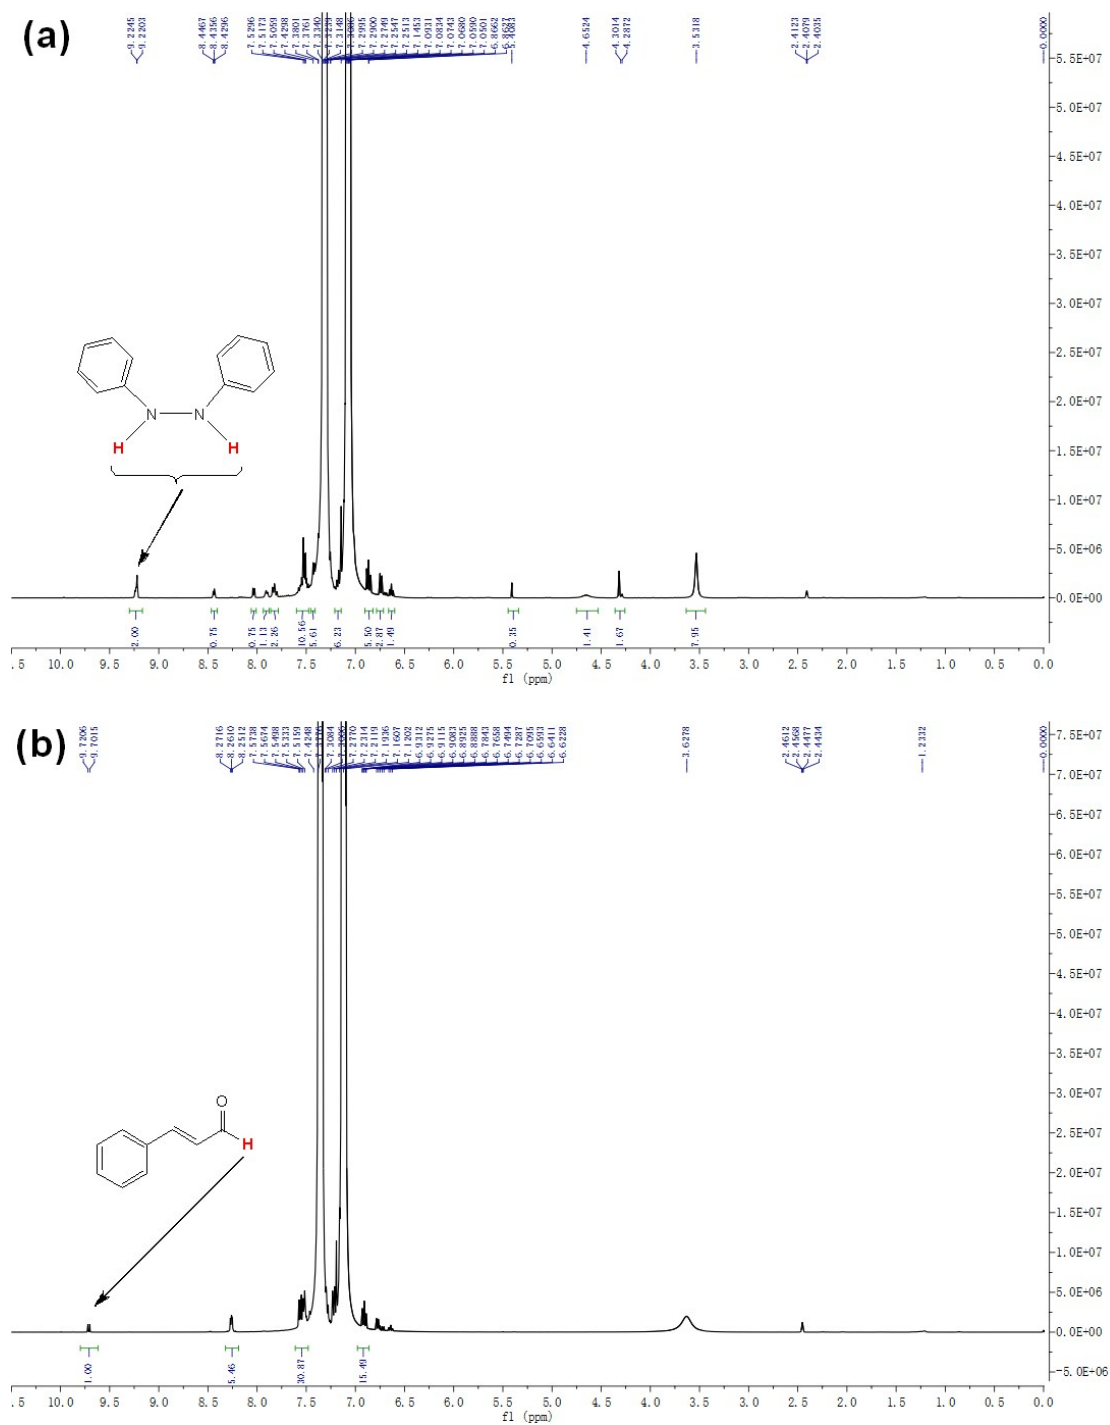

**Figure S5.** (a) <sup>1</sup>H NMR (400 MHz, DMSO-*d*<sub>6</sub>) spectrum of the reaction mixture of C<sub>60</sub>, cinnamaldehyde (**1a**), aniline (**2a**), and Mg(ClO<sub>4</sub>)<sub>2</sub> for 1 h under the optimized conditions. (b) <sup>1</sup>H NMR (400 MHz, DMSO-*d*<sub>6</sub>) spectrum of the reaction mixture of C<sub>60</sub>, cinnamaldehyde (**1a**), aniline (**2a**), and Mg(ClO<sub>4</sub>)<sub>2</sub> for 0 h under the optimized conditions.

## Experimental details and spectra data

### General procedure for the synthesis of amino-substituted cyclopentafullerenes

**3.** C<sub>60</sub> (36.0 mg, 0.05 mmol), cinnamaldehydes **1** (0.50 mmol), arylamines **2** (0.50 mmol) and Mg(ClO<sub>4</sub>)<sub>2</sub> (44.7 mg, 0.20 mmol) were added to a 50 mL round-bottom flask equipped with a reflux condenser and a magnetic stirrer. After they were completely dissolved in 6 mL of *o*-dichlorobenzene by sonication, the resulting solution was put into an oil bath preset at 180 °C and stirred under air conditions. Thin-layer chromatography (TLC) was employed to carefully monitor the reaction and to stop the reaction at the designated time. The reaction mixture was filtered through a silica gel plug to remove any insoluble material. After the solvent evaporation in vacuo was completed, the residue was separated on a silica gel column with carbon disulfide/dichloromethane as the eluent to afford first unreacted C<sub>60</sub> and then amino-substituted cyclopentafullerenes **3**.

**Cyclopentafullerenes *trans*-3aa and *cis*-3aa:** According to the general procedure, the reaction of C<sub>60</sub> (36.0 mg, 0.05 mmol) with **1a** (63 μL, 0.50 mmol), **2a** (46 μL, 0.50 mmol) and Mg(ClO<sub>4</sub>)<sub>2</sub> (44.7 mg, 0.20 mmol) in *o*-dichlorobenzene (6 mL) at 180 °C for 60 min afforded first unreacted C<sub>60</sub> (20.1 mg, 56%) and then *trans*-**3aa** (4.7 mg, 10%, R<sub>f</sub> = 0.68), *cis*-**3aa** (15.2 mg, 33%, R<sub>f</sub> = 0.59) as amorphous brown solid with CS<sub>2</sub> as eluent: mp > 300 °C. *trans*-**3aa**: <sup>1</sup>H NMR (500 MHz, CS<sub>2</sub>/DMSO-*d*<sub>6</sub>) δ 7.59 (d, *J* = 7.2 Hz, 2H), 7.30 (t, *J* = 7.6 Hz, 2H), 7.21 (t, *J* = 7.4 Hz, 1H), 7.01 (t, *J* = 7.9 Hz, 2H), 6.92 (d, *J* = 7.6 Hz, 2H), 6.74 (d, *J* = 8.5 Hz, 1H), 6.52 (t, *J* = 7.2 Hz, 1H), 5.73 (dd, *J* = 8.0, 5.3 Hz, 1H), 5.59 (dd, *J* = 14.4, 4.5 Hz, 1H), 3.80-3.73 (m, 1H), 2.92 (dd,

$J = 12.7, 4.5$  Hz, 1H);  $^{13}\text{C}$  NMR (125 MHz,  $\text{CS}_2/\text{DMSO-}d_6$ ) (all 1C unless indicated)  $\delta$  154.97, 154.26, 152.57, 152.53, 145.71, 145.60, 145.22 (2C), 145.08, 144.62, 144.30, 144.24, 144.22, 144.16, 144.09, 144.01 (2C), 143.98, 143.74, 143.61, 143.45, 143.37 (2C), 143.28 (5C), 143.10, 142.69, 142.55 (2C), 142.49, 141.12, 141.05, 140.75, 140.60, 140.52 (2C), 140.43, 140.28, 140.25, 140.23, 140.17, 140.10, 139.98 (3C), 139.80, 139.72, 139.63, 138.37, 137.68, 137.52, 137.45, 136.74, 135.81, 134.41, 134.14, 133.25, 127.79 (2C, aryl C), 127.56 (2C, aryl C), 127.04 (2C, aryl C), 126.10 (aryl C), 115.87 (aryl C), 111.84 (2C, aryl C), 76.15 ( $\text{sp}^3\text{-C}$  of  $\text{C}_{60}$ ), 73.40 ( $\text{sp}^3\text{-C}$  of  $\text{C}_{60}$ ), 63.50, 55.37, 35.15; FT-IR  $\nu/\text{cm}^{-1}$  (KBr) 3395, 3042, 1599, 1498, 1456, 1426, 1313, 1251, 1183, 1152, 1077, 869, 783, 746, 694, 599, 570, 527; UV-vis ( $\text{CHCl}_3$ )  $\lambda_{\text{max}}/\text{nm}$  256, 310, 431; HRMS (ESI)  $m/z$ :  $[\text{M}]^-$  Calcd for  $\text{C}_{75}\text{H}_{15}\text{N}$  929.1205; Found 929.1183. *cis*-**3aa**:  $^1\text{H}$  NMR (500 MHz,  $\text{CS}_2/\text{DMSO-}d_6$ )  $\delta$  7.57 (d,  $J = 7.3$  Hz, 2H), 7.30 (t,  $J = 7.6$  Hz, 2H), 7.20 (t,  $J = 7.4$  Hz, 1H), 7.00-6.96 (m, 2H), 6.83 (d,  $J = 7.7$  Hz, 2H), 6.49 (t,  $J = 7.3$  Hz, 1H), 6.05 (dd,  $J = 9.8, 3.5$  Hz, 1H), 5.84-5.79 (m, 1H), 4.98 (dd,  $J = 13.9, 4.4$  Hz, 1H), 3.67-3.59 (m, 1H), 3.01-2.97 (m, 1H);  $^{13}\text{C}$  NMR (125 MHz,  $\text{CS}_2/\text{DMSO-}d_6$ ) (all 1C unless indicated)  $\delta$  154.76, 153.09, 152.94, 152.54, 145.85, 145.79, 145.55, 145.06 (2C), 145.04, 144.18, 144.09, 144.07, 143.97, 143.95, 143.91, 143.86 (3C), 143.66, 143.56, 143.30, 143.19, 143.16, 143.10, 142.99 (2C), 142.96 (2C), 142.55, 142.35, 142.29 (2C), 140.94, 140.84, 140.52, 140.48 (2C), 140.41 (2C), 140.22 (2C), 140.11, 140.00, 139.86, 139.84, 139.75, 139.63, 139.60 (2C), 139.38, 137.72, 137.53 (2C), 137.08, 135.68, 134.33, 134.22, 133.56, 132.62, 127.50 (4C, aryl C), 127.09 (2C, aryl C), 126.05 (aryl C), 115.58 (aryl C), 111.90 (2C,

aryl C), 74.07 (sp<sup>3</sup>-C of C<sub>60</sub>), 73.84 (sp<sup>3</sup>-C of C<sub>60</sub>), 64.54, 54.35, 34.58; FT-IR  $\nu/\text{cm}^{-1}$  (KBr) 3399, 3028, 2881, 1599, 1500, 1456, 1428, 1317, 1252, 1226, 1185, 1150, 1070, 1015, 746, 693, 664, 571, 526; UV-vis (CHCl<sub>3</sub>)  $\lambda_{\text{max}}/\text{nm}$  257, 311, 430; HRMS (MALDI-TOF)  $m/z$ : [M]<sup>-</sup> Calcd for C<sub>75</sub>H<sub>15</sub>N 929.1205; Found 929.1202.

**Cyclopentafullerenes *trans*-3ab and *cis*-3ab:** According to the general procedure, the reaction of C<sub>60</sub> (36.0 mg, 0.05 mmol) with **1a** (63  $\mu\text{L}$ , 0.50 mmol), **2b** (61.6 mg, 0.50 mmol) and Mg(ClO<sub>4</sub>)<sub>2</sub> (44.7 mg, 0.20 mmol) in *o*-dichlorobenzene (6 mL) at 180 °C for 40 min afforded first unreacted C<sub>60</sub> (21.4 mg, 59%) and then *trans*-**3ab** (6.7 mg, 14%, R<sub>f</sub> = 0.68), *cis*-**3ab** (10.5 mg, 22%, R<sub>f</sub> = 0.59) as amorphous brown solid with CS<sub>2</sub>/CH<sub>2</sub>Cl<sub>2</sub> as eluent (V/V = 10/1): mp > 300 °C. *trans*-**3ab**: <sup>1</sup>H NMR (500 MHz, CS<sub>2</sub>/DMSO-*d*<sub>6</sub>)  $\delta$  7.58 (d,  $J$  = 7.8 Hz, 2H), 7.29 (t,  $J$  = 6.9 Hz, 2H), 7.20 (t,  $J$  = 7.4 Hz, 1H), 6.87 (d,  $J$  = 8.9 Hz, 2H), 6.61 (d,  $J$  = 8.9 Hz, 2H), 6.35 (d,  $J$  = 8.0 Hz, 1H), 5.65 (dd,  $J$  = 7.8, 5.7 Hz, 1H), 5.57 (dd,  $J$  = 14.3, 4.4 Hz, 1H), 3.76-3.70 (m, 1H), 3.62 (s, 3H), 2.94-2.90 (m, 1H); <sup>13</sup>C NMR (125 MHz, CS<sub>2</sub>/DMSO-*d*<sub>6</sub>) (all 1C unless indicated)  $\delta$  154.96, 154.19, 152.60, 152.50, 149.97, 145.45, 145.11 (2C), 145.02, 144.54, 144.18, 144.12 (2C), 144.04, 143.98, 143.91 (2C), 143.86, 143.63, 143.51, 143.39, 143.27, 143.25, 143.18 (2C), 143.16, 143.14 (2C), 143.00, 142.58, 142.47, 142.45, 142.38, 141.00, 140.96, 140.66, 140.49, 140.42 (2C), 140.32, 140.19, 140.14, 140.12, 140.07, 139.99, 139.88 (2C), 139.84, 139.69, 139.62 (2C), 139.53, 138.26, 137.57, 137.41, 137.36, 136.65, 135.63, 134.34, 134.02, 133.08, 127.69 (2C, aryl C), 126.93 (2C, aryl C), 125.98 (aryl C), 113.05 (2C, aryl C), 113.03 (2C, aryl C), 75.96 (sp<sup>3</sup>-C of C<sub>60</sub>), 73.30 (sp<sup>3</sup>-C of C<sub>60</sub>), 64.34, 55.20, 53.89, 35.01; FT-IR  $\nu/\text{cm}^{-1}$  (KBr) 3419,

3119, 3026, 2929, 1510, 1384, 1367, 1239, 1182, 1098, 1034, 821, 756, 697, 660, 570, 526; UV-vis (CHCl<sub>3</sub>)  $\lambda_{\text{max}}$ /nm 257, 310, 431; HRMS (ESI)  $m/z$ : [M]<sup>-</sup> Calcd for C<sub>76</sub>H<sub>17</sub>NO 959.1310; Found 959.1298. *cis*-**3ab**: <sup>1</sup>H NMR (500 MHz, CS<sub>2</sub>/DMSO-*d*<sub>6</sub>)  $\delta$  7.57 (d,  $J$  = 7.5 Hz, 2H), 7.29 (t,  $J$  = 7.5 Hz, 2H), 7.20 (t,  $J$  = 7.3 Hz, 1H), 6.78 (d,  $J$  = 8.6 Hz, 2H), 6.57 (d,  $J$  = 8.6 Hz, 2H), 5.77-5.70 (m, 2H), 4.96 (dd,  $J$  = 13.8, 4.1 Hz, 1H), 3.61 (s, 3H), 3.58-3.55 (m, 1H), 2.99-2.97 (m, 1H); <sup>13</sup>C NMR (125 MHz, CS<sub>2</sub>/DMSO-*d*<sub>6</sub>) (all 1C unless indicated)  $\delta$  155.07 (aryl C), 153.36, 153.21, 152.77, 150.01, 146.20, 145.85, 145.33, 145.29, 145.26, 144.42, 144.33, 144.30, 144.23, 144.16, 144.15, 144.09 (3C), 143.91, 143.79, 143.53, 143.43, 143.40, 143.33, 143.25, 143.22, 143.19 (2C), 142.79, 142.60, 142.53 (2C), 141.18, 141.08, 140.76, 140.72 (2C), 140.65 (2C), 140.47 (2C), 140.36, 140.24, 140.08 (3C), 139.99, 139.86 (2C), 139.82, 139.61, 137.97, 137.73, 137.70, 137.32, 135.93, 134.60, 134.46, 133.79, 132.81 (aryl C), 127.73 (2C, aryl C), 127.24 (2C, aryl C), 126.20 (aryl C), 113.38 (2C, aryl C), 113.27 (2C, aryl C), 74.32 (sp<sup>3</sup>-C of C<sub>60</sub>), 74.09 (sp<sup>3</sup>-C of C<sub>60</sub>), 65.85, 54.60, 54.02, 34.93; FT-IR  $\nu/\text{cm}^{-1}$  (KBr) 3364, 3028, 2942, 2890, 2825, 1602, 1510, 1457, 1428, 1357, 1288, 1237, 1181, 1146, 1099, 1069, 1037, 906, 819, 783, 762, 696, 664, 599, 571, 526; UV-vis (CHCl<sub>3</sub>)  $\lambda_{\text{max}}$ /nm 257, 310, 431; HRMS (ESI)  $m/z$ : [M]<sup>-</sup> Calcd for C<sub>76</sub>H<sub>17</sub>NO 959.1310; Found 959.1281.

**Cyclopentafullerenes *trans/cis*-3ac:** According to the general procedure, the reaction of C<sub>60</sub> (36.0 mg, 0.05 mmol) with **1a** (63  $\mu$ L, 0.50 mmol), **2c** (70  $\mu$ L, 0.50 mmol) and Mg(ClO<sub>4</sub>)<sub>2</sub> (44.7 mg, 0.20 mmol) in *o*-dichlorobenzene (6 mL) at 180 °C for 30 min afforded first unreacted C<sub>60</sub> (29.8 mg, 83%) and then *trans/cis*-**3ac** (7.9 mg,

16%, *trans/cis* = 1/5.6,  $R_f = 0.66$ ) as an amorphous brown solid with  $CS_2$  as eluent: mp > 300 °C. *cis*-**3ac**:  $^1H$  NMR (500 MHz,  $CS_2/DMSO-d_6$ )  $\delta$  7.54 (d,  $J = 7.5$  Hz, 2H), 7.26 (t,  $J = 7.6$  Hz, 2H), 7.18 (t,  $J = 7.4$  Hz, 1H), 6.76 (s, 2H), 5.26-5.20 (m, 1H), 4.79 (dd,  $J = 13.7, 4.2$  Hz, 1H), 3.65 (d,  $J = 12.2$  Hz, 1H), 3.43 (q,  $J = 12.4$  Hz, 1H), 2.92-2.88 (m, 1H), 2.42 (s, 6H), 2.21 (s, 3H);  $^{13}C$  NMR (125 MHz,  $CS_2/DMSO-d_6$ ) (all 1C unless indicated)  $\delta$  154.46, 153.65, 152.49, 150.94, 146.47, 145.66, 145.25, 145.21, 144.83, 144.43, 144.31 (2C), 144.25 (2C), 144.14, 144.10, 144.02, 143.98, 143.86, 143.73, 143.68, 143.40, 143.34 (3C), 143.21, 143.14 (2C), 142.62, 142.59, 142.54, 142.48, 141.14, 141.09, 140.75, 140.70, 140.67, 140.60, 140.51, 140.45, 140.36, 140.24 (3C), 140.08, 140.03, 139.89, 139.81 (2C), 139.70 (2C), 137.99, 137.75, 137.50, 137.39, 135.53, 135.30, 134.19, 133.43, 132.97 (aryl C), 130.02 (aryl C), 128.61 (2C, aryl C), 128.35 (2C, aryl C), 127.71 (2C, aryl C), 127.09 (2C, aryl C), 126.17 (aryl C), 73.80 ( $sp^3$ -C of  $C_{60}$ ), 73.10 ( $sp^3$ -C of  $C_{60}$ ), 68.70, 54.82, 36.51, 19.41, 17.78 (2C); FT-IR  $\nu/cm^{-1}$  (KBr) 3419, 3027, 2951, 2895, 1599, 1482, 1429, 1372, 1303, 1228, 1186, 1070, 1027, 906, 854, 762, 695, 667, 597, 571, 527; UV-vis ( $CHCl_3$ )  $\lambda_{max}/nm$  257, 310, 431; HRMS (MALDI-TOF)  $m/z$ :  $[M]^-$  Calcd for  $C_{78}H_{21}N$  971.1674; Found 971.1673.

**Cyclopentafullerenes *trans*-3ad and *cis*-3ad:** According to the general procedure, the reaction of  $C_{60}$  (36.0 mg, 0.05 mmol) with **1a** (63  $\mu$ L, 0.50 mmol), **2d** (53.6 mg, 0.50 mmol) and  $Mg(ClO_4)_2$  (44.7 mg, 0.20 mmol) in *o*-dichlorobenzene (6 mL) at 180 °C for 60 min afforded first unreacted  $C_{60}$  (22.3 mg, 62%) and then *trans*-**3ad** (3.1 mg, 7%,  $R_f = 0.47$ ), *cis*-**3ad** (13.1 mg, 28%,  $R_f = 0.29$ ) as amorphous brown solid with

CS<sub>2</sub> as eluent: mp > 300 °C. *trans*-**3ad**: <sup>1</sup>H NMR (500 MHz, CS<sub>2</sub>/DMSO-*d*<sub>6</sub>) δ 7.58 (d, *J* = 7.2 Hz, 2H), 7.29 (t, *J* = 7.6 Hz, 2H), 7.20 (t, *J* = 7.4 Hz, 1H), 6.85 (d, *J* = 8.5 Hz, 2H), 6.81 (d, *J* = 8.5 Hz, 2H), 6.12-6.10 (m, 1H), 5.67 (dd, *J* = 7.2, 5.3 Hz, 1H), 5.50 (dd, *J* = 14.3, 4.5 Hz, 1H), 3.76-3.70 (m, 1H), 2.96 (dd, *J* = 12.6, 4.6 Hz, 1H), 2.18 (s, 3H); <sup>13</sup>C NMR (125 MHz, CS<sub>2</sub>/DMSO-*d*<sub>6</sub>) (all 1C unless indicated) δ 155.02, 154.30, 152.67, 152.59, 145.63, 145.21 (2C), 145.10, 144.64, 144.29, 144.24, 144.22, 144.14, 144.08, 144.01 (2C), 143.97, 143.74, 143.62, 143.48, 143.42, 143.36 (2C), 143.29 (3C), 143.27, 143.25, 143.10, 142.69, 142.56 (2C), 142.48, 141.11, 141.05, 140.76, 140.59, 140.52 (2C), 140.43, 140.29, 140.25, 140.23, 140.18, 140.10, 139.98 (3C), 139.79, 139.72, 139.63, 138.36, 137.67, 137.51, 137.43, 136.76, 135.76, 134.42, 134.13, 133.21, 128.06 (2C, aryl C), 127.78 (2C, aryl C), 127.03 (2C, aryl C), 126.08 (aryl C), 123.98 (aryl C), 112.01 (2C, aryl C), 76.18 (sp<sup>3</sup>-C of C<sub>60</sub>), 73.40 (sp<sup>3</sup>-C of C<sub>60</sub>), 63.77, 55.35, 35.13, 19.24; FT-IR ν/cm<sup>-1</sup> (KBr) 3396, 3019, 2948, 1617, 1516, 1456, 1383, 1303, 1249, 1185, 885, 807, 695, 670, 527; UV-vis (CHCl<sub>3</sub>) λ<sub>max</sub>/nm 257, 309, 431; HRMS (ESI) *m/z*: [M]<sup>-</sup> Calcd for C<sub>76</sub>H<sub>17</sub>N 943.1361; Found 943.1338. *cis*-**3ad**: <sup>1</sup>H NMR (500 MHz, CS<sub>2</sub>/DMSO-*d*<sub>6</sub>) δ 7.56 (d, *J* = 7.4 Hz, 2H), 7.29 (t, *J* = 7.6 Hz, 2H), 7.20 (t, *J* = 7.4 Hz, 1H), 6.82 (d, *J* = 8.4 Hz, 2H), 6.72 (d, *J* = 8.4 Hz, 2H), 5.77-5.71 (m, 1H), 5.26 (d, *J* = 9.9 Hz, 1H), 4.93 (dd, *J* = 13.8, 4.4 Hz, 1H), 3.58-3.50 (m, 1H), 3.07-3.02 (m, 1H), 2.16 (s, 3H); <sup>13</sup>C NMR (125 MHz, CS<sub>2</sub>/DMSO-*d*<sub>6</sub>) (all 1C unless indicated) δ 154.64, 152.93, 152.73, 152.36, 145.70, 145.43, 144.89, 144.86, 144.84, 143.98, 143.87 (2C), 143.78, 143.74, 143.72, 143.66 (3C), 143.46, 143.37, 143.27, 143.10, 142.99, 142.97, 142.90, 142.81, 142.78, 142.76 (2C), 142.36,

142.17, 142.09 (2C), 140.74, 140.64, 140.33, 140.29 (2C), 140.22 (2C), 140.03 (2C), 139.92, 139.81, 139.68, 139.64, 139.56, 139.42 (3C), 139.18, 137.53, 137.32, 137.31, 136.88, 135.50, 134.13, 134.03, 133.37, 132.37, 127.83 (2C, aryl C), 127.35 (2C, aryl C), 126.95 (2C, aryl C), 125.92 (aryl C), 123.52 (aryl C), 111.90 (2C, aryl C), 73.92 (sp<sup>3</sup>-C of C<sub>60</sub>), 73.66 (sp<sup>3</sup>-C of C<sub>60</sub>), 64.66, 54.18, 34.47, 18.97; FT-IR  $\nu/\text{cm}^{-1}$  (KBr) 3413, 3024, 2908, 1614, 1515, 1455, 1426, 1356, 1295, 1249, 1223, 1185, 1141, 1011, 807, 761, 696, 666, 653, 571, 527; UV-vis (CHCl<sub>3</sub>)  $\lambda_{\text{max}}/\text{nm}$  257, 310, 430; HRMS (ESI)  $m/z$ : [M]<sup>-</sup> Calcd for C<sub>76</sub>H<sub>17</sub>N 943.1361; Found 943.1335.

**Cyclopentafullerenes *trans*-3ae and *cis*-3ae:** According to the general procedure, the reaction of C<sub>60</sub> (36.0 mg, 0.05 mmol) with **1a** (63  $\mu\text{L}$ , 0.50 mmol), **2e** (63.8 mg, 0.50 mmol) and Mg(ClO<sub>4</sub>)<sub>2</sub> (44.7 mg, 0.20 mmol) in *o*-dichlorobenzene (6 mL) at 180 °C for 30 min afforded first unreacted C<sub>60</sub> (25.1 mg, 70%) and then *trans*-**3ae** (5.1 mg, 11%, R<sub>f</sub> = 0.64), *cis*-**3ae** (6.3 mg, 13%, R<sub>f</sub> = 0.45) as amorphous brown solid with CS<sub>2</sub> as eluent: mp > 300 °C. *trans*-**3ae**: <sup>1</sup>H NMR (500 MHz, CS<sub>2</sub>/DMSO-*d*<sub>6</sub>)  $\delta$  7.59 (d,  $J$  = 7.2 Hz, 2H), 7.30 (t,  $J$  = 7.6 Hz, 2H), 7.21 (t,  $J$  = 7.4 Hz, 1H), 7.08 (d,  $J$  = 8.3 Hz, 1H), 6.96 (d,  $J$  = 9.1 Hz, 2H), 6.92 (d,  $J$  = 9.1 Hz, 2H), 5.71 (dd,  $J$  = 8.0, 5.4 Hz, 1H), 5.58 (dd,  $J$  = 14.4, 4.5 Hz, 1H), 3.80-3.73 (m, 1H), 2.90 (dd,  $J$  = 12.5, 4.3 Hz, 1H); <sup>13</sup>C NMR (125 MHz, CS<sub>2</sub>/DMSO-*d*<sub>6</sub>) (all 1C unless indicated)  $\delta$  154.40, 153.75, 152.04, 151.99, 145.07, 144.83 (2C), 144.65, 144.17 (2C), 143.90, 143.85, 143.83, 143.77, 143.70, 143.62 (2C), 143.59, 143.33, 143.19, 142.98 (2C), 142.90 (4C), 142.85, 142.71 (2C), 142.28, 142.16 (2C), 142.09, 140.72, 140.67, 140.37, 140.21, 140.13 (2C), 140.03, 139.82 (3C), 139.75, 139.70, 139.58 (3C), 139.40, 139.33, 139.23,



137.98, 137.29, 137.12, 137.07, 136.25, 135.43, 134.01, 133.70, 132.90, 127.40 (2C, aryl C), 126.92 (2C, aryl C), 126.79 (2C, aryl C), 125.87 (aryl C), 119.40 (aryl C), 112.62 (2C, aryl C), 75.71 (sp<sup>3</sup>-C of C<sub>60</sub>), 72.96 (sp<sup>3</sup>-C of C<sub>60</sub>), 63.11, 54.95, 34.66; FT-IR  $\nu/\text{cm}^{-1}$  (KBr) 3395, 3023, 2898, 2361, 1598, 1495, 1457, 1384, 1311, 1182, 1094, 903, 813, 761, 697, 615, 528; UV-vis (CHCl<sub>3</sub>)  $\lambda_{\text{max}}/\text{nm}$  256, 311, 431; HRMS (ESI)  $m/z$ : [M]<sup>-</sup> Calcd for C<sub>75</sub>H<sub>14</sub>ClN 963.0815; Found 963.0753. *cis*-**3ae**: <sup>1</sup>H NMR (500 MHz, CS<sub>2</sub>/DMSO-*d*<sub>6</sub>)  $\delta$  7.57 (d,  $J = 7.4$  Hz, 2H), 7.30 (t,  $J = 7.6$  Hz, 2H), 7.20 (t,  $J = 7.3$  Hz, 1H), 6.92 (d,  $J = 8.8$  Hz, 2H), 6.83 (d,  $J = 8.8$  Hz, 2H), 6.52 (d,  $J = 9.5$  Hz, 1H), 5.84-5.78 (m, 1H), 4.99 (dd,  $J = 13.9, 4.3$  Hz, 1H), 3.62 (q,  $J = 12.6$  Hz, 1H), 2.98-2.94 (m, 1H); <sup>13</sup>C NMR (125 MHz, CS<sub>2</sub>/DMSO-*d*<sub>6</sub>) (all 1C unless indicated)  $\delta$  154.68, 153.15, 152.99, 152.56, 145.81, 145.54, 145.19, 145.16 (2C), 144.77, 144.30, 144.21, 144.19, 144.06 (3C), 143.99 (2C), 143.96, 143.75, 143.65, 143.42, 143.31, 143.29, 143.23, 143.11 (4C), 142.66, 142.46, 142.42 (2C), 141.07, 140.97, 140.65, 140.61 (2C), 140.55, 140.47, 140.34, 140.33, 140.22, 140.13, 140.00, 139.96, 139.87, 139.73 (2C), 139.70, 139.50, 137.86, 137.68 (2C), 137.21, 135.75, 134.44, 134.29, 133.67, 132.84, 127.61 (2C, aryl C), 127.27 (2C, aryl C), 127.18 (2C, aryl C), 126.15 (aryl C), 119.48 (aryl C), 113.11 (2C, aryl C), 74.08 (sp<sup>3</sup>-C of C<sub>60</sub>), 73.95 (sp<sup>3</sup>-C of C<sub>60</sub>), 64.53, 54.38, 34.52; FT-IR  $\nu/\text{cm}^{-1}$  (KBr) 3402, 3057, 3024, 2954, 1597, 1494, 1457, 1426, 1401, 1313, 1249, 1182, 1137, 1093, 1068, 1009, 813, 781, 762, 695, 668, 597, 571, 527; UV-vis (CHCl<sub>3</sub>)  $\lambda_{\text{max}}/\text{nm}$  257, 313, 430; HRMS (ESI)  $m/z$ : [M]<sup>-</sup> Calcd for C<sub>75</sub>H<sub>14</sub>ClN 963.0815; Found 963.0748.

**Cyclopentafullerenes *trans*-3af and *cis*-3af:** According to the general procedure, the reaction of C<sub>60</sub> (36.0 mg, 0.05 mmol) with **1a** (63 μL, 0.50 mmol), **2f** (86.0 mg, 0.50 mmol) and Mg(ClO<sub>4</sub>)<sub>2</sub> (44.7 mg, 0.20 mmol) in *o*-dichlorobenzene (6 mL) at 180 °C for 50 min afforded first unreacted C<sub>60</sub> (26.4 mg, 73%) and then *trans*-**3af** (4.4 mg, 9%, R<sub>f</sub> = 0.80), *cis*-**3af** (6.2 mg, 12%, R<sub>f</sub> = 0.63) as amorphous brown solid with CS<sub>2</sub> as eluent: mp > 300 °C. *trans*-**3af**: <sup>1</sup>H NMR (500 MHz, CS<sub>2</sub>/DMSO-*d*<sub>6</sub>) δ 7.59 (d, *J* = 7.4 Hz, 2H), 7.30 (t, *J* = 7.6 Hz, 2H), 7.21 (t, *J* = 7.4 Hz, 1H), 7.12 (d, *J* = 8.5 Hz, 1H), 7.08 (d, *J* = 8.8 Hz, 2H), 6.88 (d, *J* = 8.8 Hz, 2H), 5.70 (dd, *J* = 8.2, 5.4 Hz, 1H), 5.58 (dd, *J* = 14.4, 4.5 Hz, 1H), 3.80-3.73 (m, 1H), 2.89 (dd, *J* = 12.7, 4.5 Hz, 1H); <sup>13</sup>C NMR (125 MHz, CS<sub>2</sub>/DMSO-*d*<sub>6</sub>) (all 1C unless indicated) δ 154.40, 153.77, 152.06, 151.98, 145.09, 144.85 (2C), 144.67, 144.60, 144.19, 143.93, 143.88, 143.85, 143.79, 143.72, 143.64 (2C), 143.61, 143.35, 143.21, 143.01 (2C), 142.93 (5C), 142.88, 142.74, 142.31, 142.19 (2C), 142.11, 140.75, 140.69, 140.39, 140.24, 140.16 (2C), 140.06, 139.84 (3C), 139.77, 139.73, 139.61 (3C), 139.43, 139.35, 139.25, 138.01, 137.31, 137.15, 137.10, 136.27, 135.46, 134.03, 133.72, 132.94, 129.78 (2C, aryl C), 127.42 (2C, aryl C), 126.82 (2C, aryl C), 125.90 (aryl C), 113.15 (2C, aryl C), 106.84 (aryl C), 75.73 (sp<sup>3</sup>-C of C<sub>60</sub>), 72.98 (sp<sup>3</sup>-C of C<sub>60</sub>), 63.03, 54.97, 34.66; FT-IR ν/cm<sup>-1</sup> (KBr) 3399, 3023, 2884, 2799, 1592, 1493, 1457, 1427, 1395, 1311, 1249, 1184, 1075, 929, 810, 763, 695, 570, 528; UV-vis (CHCl<sub>3</sub>) λ<sub>max</sub>/nm 257, 312, 431; HRMS (ESI) *m/z*: [M]<sup>-</sup> Calcd for C<sub>75</sub>H<sub>14</sub>BrN 1007.0310; Found 1007.0259. *cis*-**3af**: <sup>1</sup>H NMR (500 MHz, CS<sub>2</sub>/DMSO-*d*<sub>6</sub>) δ 7.57 (d, *J* = 7.5 Hz, 2H), 7.30 (t, *J* = 7.6 Hz, 2H), 7.20 (t, *J* = 7.3 Hz, 1H), 7.05 (d, *J* = 8.8 Hz, 2H), 6.80 (d, *J* = 8.8 Hz, 2H), 6.57 (d, *J* = 9.4 Hz,

1H), 5.83-5.78 (m, 1H), 4.99 (dd,  $J = 13.9, 4.2$  Hz, 1H), 3.63 (q,  $J = 12.6$  Hz, 1H), 3.10-2.93 (m, 1H);  $^{13}\text{C}$  NMR (125 MHz,  $\text{CS}_2/\text{DMSO-}d_6$ ) (all 1C unless indicated)  $\delta$  154.59, 153.08, 152.91, 152.50, 145.72, 145.46, 145.11 (2C), 145.09 (2C), 144.22, 144.11 (2C), 143.98 (3C), 143.91 (3C), 143.68, 143.58, 143.34, 143.23, 143.21, 143.16, 143.03 (4C), 142.59, 142.39, 142.34 (2C), 140.99, 140.90, 140.58, 140.53 (2C), 140.47, 140.39, 140.27, 140.25, 140.14, 140.05, 139.93, 139.88, 139.79, 139.66 (2C), 139.62, 139.43, 137.78, 137.62 (2C), 137.13, 135.68, 134.36, 134.22, 133.60, 132.78, 130.05 (2C, aryl C), 127.55 (2C, aryl C), 127.14 (2C, aryl C), 126.12 (aryl C), 113.56 (2C, aryl C), 106.75 (aryl C), 73.99 ( $\text{sp}^3\text{-C}$  of  $\text{C}_{60}$ ), 73.87 ( $\text{sp}^3\text{-C}$  of  $\text{C}_{60}$ ), 64.33, 54.29, 34.42; FT-IR  $\nu/\text{cm}^{-1}$  (KBr) 3403, 3064, 3026, 2950, 2883, 1591, 1492, 1457, 1426, 1398, 1311, 1248, 1182, 1139, 1071, 1008, 810, 781, 761, 695, 653, 570, 526; UV-vis ( $\text{CHCl}_3$ )  $\lambda_{\text{max}}/\text{nm}$  257, 312, 430; HRMS (ESI)  $m/z$ :  $[\text{M}]^-$  Calcd for  $\text{C}_{75}\text{H}_{14}\text{BrN}$  1007.0310; Found 1007.0251.

**Cyclopentafullerenes *trans*-3ba and *cis*-3ba:** According to the general procedure, the reaction of  $\text{C}_{60}$  (36.0 mg, 0.05 mmol) with **1b** (88.1 mg, 0.50 mmol), **2a** (46  $\mu\text{L}$ , 0.50 mmol) and  $\text{Mg}(\text{ClO}_4)_2$  (44.7 mg, 0.20 mmol) in *o*-dichlorobenzene (6 mL) at 180  $^\circ\text{C}$  for 40 min afforded first unreacted  $\text{C}_{60}$  (25.2 mg, 70%) and then *trans*-**3ba** (4.6 mg, 10%,  $R_f = 0.77$ ), *cis*-**3ba** (7.8 mg, 16%,  $R_f = 0.67$ ) as amorphous brown solid with  $\text{CS}_2/\text{CH}_2\text{Cl}_2$  as eluent (V/V = 10/1): mp > 300  $^\circ\text{C}$ . *trans*-**3ba**:  $^1\text{H}$  NMR (500 MHz,  $\text{CS}_2/\text{DMSO-}d_6$ )  $\delta$  7.49 (d,  $J = 8.6$  Hz, 2H), 7.01 (t,  $J = 7.7$  Hz, 2H), 6.91 (d,  $J = 8.2$  Hz, 2H), 6.80 (d,  $J = 8.2$  Hz, 2H), 6.75 (d,  $J = 8.0$  Hz, 1H), 6.52 (t,  $J = 7.2$  Hz, 1H), 5.72-5.70 (m, 1H), 5.54 (dd,  $J = 14.3, 4.3$  Hz, 1H), 3.74-3.68 (m, 1H), 3.71 (s, 3H), 2.88

(dd,  $J = 12.6, 4.3$  Hz, 1H);  $^{13}\text{C}$  NMR (125 MHz,  $\text{CS}_2/\text{DMSO-}d_6$ ) (all 1C unless indicated)  $\delta$  156.77 (aryl C), 154.88, 154.28, 152.58, 152.40, 145.52, 145.42, 144.98 (2C), 144.89, 144.59, 144.06, 143.99 (2C), 143.92, 143.85, 143.77 (2C), 143.73, 143.52, 143.39, 143.23, 143.12, 143.03 (6C), 142.86, 142.46, 142.33 (2C), 142.28, 140.88, 140.81, 140.52, 140.36, 140.28 (2C), 140.20, 140.06, 140.03, 139.98 (2C), 139.87, 139.76 (2C), 139.72, 139.56, 139.53, 139.41, 138.11, 137.51, 137.36, 137.18, 135.59, 134.11, 133.85, 133.04, 128.49 (2C, aryl C), 128.30 (aryl C), 127.36 (2C, aryl C), 115.63 (aryl C), 112.24 (2C, aryl C), 111.60 (2C, aryl C), 75.89 ( $\text{sp}^3\text{-C}$  of  $\text{C}_{60}$ ), 73.41 ( $\text{sp}^3\text{-C}$  of  $\text{C}_{60}$ ), 63.21, 54.53, 53.83, 35.23; FT-IR  $\nu/\text{cm}^{-1}$  (KBr) 3395, 2922, 2851, 1601, 1507, 1461, 1427, 1311, 1251, 1180, 1149, 1034, 829, 746, 690, 666, 570, 527; UV-vis ( $\text{CHCl}_3$ )  $\lambda_{\text{max}}/\text{nm}$  257, 308, 431; HRMS (ESI)  $m/z$ :  $[\text{M}]^-$  Calcd for  $\text{C}_{76}\text{H}_{17}\text{NO}$  959.1310; Found 959.1257. *cis*-**3ba**:  $^1\text{H}$  NMR (500 MHz,  $\text{CS}_2/\text{DMSO-}d_6$ )  $\delta$  7.47 (d,  $J = 8.6$  Hz, 2H), 6.97 (t,  $J = 7.8$  Hz, 2H), 6.83-6.79 (m, 4H), 6.47 (t,  $J = 7.3$  Hz, 1H), 6.15 (d,  $J = 9.3$  Hz, 1H), 5.83-5.78 (m, 1H), 4.93 (dd,  $J = 13.8, 4.4$  Hz, 1H), 3.71 (s, 3H), 3.58 (q,  $J = 12.6$  Hz, 1H), 2.96-2.92 (m, 1H);  $^{13}\text{C}$  NMR (125 MHz,  $\text{CS}_2/\text{DMSO-}d_6$ ) (all 1C unless indicated)  $\delta$  156.63 (aryl C), 154.52, 153.10, 152.89, 152.42, 145.55 (2C), 145.32, 144.82, 144.76 (2C), 143.88 (2C), 143.80, 143.77, 143.65, 143.63, 143.56 (2C), 143.54, 143.38, 143.28, 143.00, 142.87 (2C), 142.81, 142.71 (2C), 142.67 (2C), 142.26, 142.07, 142.03, 142.01, 140.65, 140.55, 140.19 (3C), 140.13 (2C), 139.96 (2C), 139.83, 139.72, 139.56 (2C), 139.50, 139.36, 139.32 (2C), 139.11, 137.50, 137.20 (2C), 136.86, 134.05, 133.89, 133.20, 132.36, 128.17 (2C, aryl C), 127.27 (2C, aryl C), 127.14 (aryl C), 115.32 (aryl C), 112.26 (2C, aryl

C), 111.64 (2C, aryl C), 73.86 (sp<sup>3</sup>-C of C<sub>60</sub>), 73.77 (sp<sup>3</sup>-C of C<sub>60</sub>), 64.24, 53.76, 53.43, 34.62; FT-IR  $\nu/\text{cm}^{-1}$  (KBr) 3391, 3022, 2946, 2889, 2826, 1601, 1508, 1457, 1430, 1308, 1251, 1180, 1033, 830, 747, 687, 651, 525; UV-vis (CHCl<sub>3</sub>)  $\lambda_{\text{max}}/\text{nm}$  256, 308, 430; HRMS (ESI)  $m/z$ : [M]<sup>-</sup> Calcd for C<sub>76</sub>H<sub>17</sub>NO 959.1310; Found 959.1256.

**Cyclopentafullerenes *trans*-3ca and *cis*-3ca:** According to the general procedure, the reaction of C<sub>60</sub> (36.0 mg, 0.05 mmol) with **1c** (88.6 mg, 0.50 mmol), **2a** (46  $\mu\text{L}$ , 0.50 mmol) and Mg(ClO<sub>4</sub>)<sub>2</sub> (44.7 mg, 0.20 mmol) in *o*-dichlorobenzene (6 mL) at 180 °C for 40 min afforded first unreacted C<sub>60</sub> (21.3 mg, 59%) and then *trans*-**3ca** (7.6 mg, 16%, R<sub>f</sub> = 0.71), *cis*-**3ca** (10.9 mg, 22%, R<sub>f</sub> = 0.65) as amorphous brown solid with CS<sub>2</sub>/CH<sub>2</sub>Cl<sub>2</sub> as eluent (V/V = 10/1): mp > 300 °C. *trans*-**3ca**: <sup>1</sup>H NMR (500 MHz, CS<sub>2</sub>/DMSO-*d*<sub>6</sub>)  $\delta$  8.16 (d,  $J$  = 8.6 Hz, 2H), 7.87 (d,  $J$  = 8.6 Hz, 2H), 7.02 (t,  $J$  = 7.8 Hz, 2H), 6.93-6.89 (m, 3H), 6.53 (t,  $J$  = 7.2 Hz, 1H), 5.83-5.77 (m, 2H), 3.85-3.79 (m, 1H), 2.96 (dd,  $J$  = 12.6, 4.5 Hz, 1H); <sup>13</sup>C NMR (125 MHz, CS<sub>2</sub>/DMSO-*d*<sub>6</sub>) (all 1C unless indicated)  $\delta$  154.17, 153.01, 152.05, 150.98, 145.26, 145.08, 144.90 (2C), 144.84, 144.22 (2C), 143.97, 143.91, 143.85, 143.78, 143.73, 143.66 (2C), 143.63 (2C), 143.28, 143.20, 143.06, 142.98 (4C), 142.91 (3C), 142.78, 142.35, 142.23, 142.12, 142.02, 140.77, 140.71, 140.42, 140.25, 140.19, 140.15, 140.07, 139.90, 139.86 (2C), 139.68 (2C), 139.62, 139.54, 139.50, 139.41, 139.39, 139.29, 138.10, 137.38, 137.21, 137.11, 135.33, 134.43, 134.24, 132.77, 128.65 (2C, aryl C), 127.28 (2C, aryl C), 121.69 (2C, aryl C), 115.66 (aryl C), 111.50 (2C, aryl C), 75.88 (sp<sup>3</sup>-C of C<sub>60</sub>), 72.58 (sp<sup>3</sup>-C of C<sub>60</sub>), 63.17, 54.45, 34.77; FT-IR  $\nu/\text{cm}^{-1}$  (KBr) 3394, 2954, 2883, 1600, 1519, 1501, 1427, 1344, 1315, 1252, 1184, 855, 748, 694, 670, 570, 527;

UV-vis (CHCl<sub>3</sub>)  $\lambda_{\text{max}}$ /nm 257, 313, 431; HRMS (ESI)  $m/z$ : [M]<sup>-</sup> Calcd for C<sub>75</sub>H<sub>14</sub>N<sub>2</sub>O<sub>2</sub> 974.1055; Found 974.0982. *cis*-**3ca**: <sup>1</sup>H NMR (500 MHz, CS<sub>2</sub>/DMSO-*d*<sub>6</sub>)  $\delta$  8.16 (d,  $J$  = 8.5 Hz, 2H), 7.85 (d,  $J$  = 8.5 Hz, 2H), 6.98 (t,  $J$  = 7.8 Hz, 2H), 6.84 (d,  $J$  = 8.0 Hz, 2H), 6.49 (t,  $J$  = 7.2 Hz, 1H), 6.29 (d,  $J$  = 9.5 Hz, 1H), 5.92-5.86 (m, 1H), 5.19 (dd,  $J$  = 13.8, 4.4 Hz, 1H), 3.68 (q,  $J$  = 12.7 Hz, 1H), 3.03-2.99 (m, 1H); <sup>13</sup>C NMR (125 MHz, CS<sub>2</sub>/DMSO-*d*<sub>6</sub>) (all 1C unless indicated)  $\delta$  154.18, 151.89, 151.79, 151.57, 145.41, 145.39, 145.06, 144.81, 144.73, 144.66, 144.22, 143.76 (2C), 143.72, 143.56 (2C), 143.50 (3C), 143.36, 143.21, 143.13, 142.96, 142.92 (2C), 142.84, 142.72 (3C), 142.58 (2C), 142.22, 142.03, 141.84 (2C), 140.59, 140.49, 140.14 (3C), 140.04, 139.99, 139.86, 139.75 (2C), 139.58, 139.49, 139.40 (2C), 139.21 (2C), 139.18, 139.04, 137.42, 137.24, 137.18, 136.77, 134.31, 133.82, 133.61, 132.21, 128.43 (2C, aryl C), 127.20 (2C, aryl C), 121.70 (2C, aryl C), 115.31 (aryl C), 111.55 (2C, aryl C), 73.68 (sp<sup>3</sup>-C of C<sub>60</sub>), 72.92 (sp<sup>3</sup>-C of C<sub>60</sub>), 64.05, 53.16, 34.00; FT-IR  $\nu$ /cm<sup>-1</sup> (KBr) 3394, 2921, 2851, 1597, 1515, 1462, 1428, 1343, 1314, 1252, 1181, 1147, 1104, 1011, 852, 779, 747, 693, 593, 570, 525; UV-vis (CHCl<sub>3</sub>)  $\lambda_{\text{max}}$ /nm 257, 307, 430; HRMS (ESI)  $m/z$ : [M]<sup>-</sup> Calcd for C<sub>75</sub>H<sub>14</sub>N<sub>2</sub>O<sub>2</sub> 974.1055; Found 974.0985.

**Cyclopentafullerenes *trans/cis*-3da**: According to the general procedure, the reaction of C<sub>60</sub> (36.0 mg, 0.05 mmol) with **1c** (71  $\mu$ L, 0.50 mmol), **2a** (46  $\mu$ L, 0.50 mmol) and Mg(ClO<sub>4</sub>)<sub>2</sub> (44.7 mg, 0.20 mmol) in *o*-dichlorobenzene (6 mL) at 180 °C for 40 min afforded first unreacted C<sub>60</sub> (30.2 mg, 84%) and then *trans/cis*-**3ca** (6.1 mg, 13%, *trans/cis* = 1/4, R<sub>f</sub> = 0.73) as amorphous brown solid with CS<sub>2</sub> as eluent: mp > 300 °C. *cis*-**3da**: <sup>1</sup>H NMR (500 MHz, CS<sub>2</sub>/DMSO-*d*<sub>6</sub>)  $\delta$  7.92 (br.s, 2H), 7.47 (t,  $J$  =

7.3 Hz, 2H), 7.34 (t,  $J = 7.1$  Hz, 1H), 6.95 (t,  $J = 7.6$  Hz, 2H), 6.81 (d,  $J = 8.0$  Hz, 2H), 6.45 (t,  $J = 7.1$  Hz, 1H), 6.20 (d,  $J = 9.5$  Hz, 1H), 5.77-5.70 (m, 1H), 5.01 (d,  $J = 7.5$  Hz, 1H), 3.84-3.76 (m, 1H), 1.16 (d,  $J = 6.6$  Hz, 3H);  $^{13}\text{C}$  NMR (125 MHz,  $\text{CS}_2/\text{DMSO}-d_6$ ) (all 1C unless indicated)  $\delta$  157.64, 154.80, 153.21, 152.60, 146.26, 146.08, 145.62, 145.14, 145.06, 144.76, 144.17, 144.01, 143.92 (3C), 143.87 (2C), 143.72, 143.57, 143.30 (2C), 143.12 (2C), 143.06, 143.00 (2C), 142.95, 142.91, 142.79, 142.56, 142.39 (2C), 142.25, 140.94, 140.90, 140.53, 140.49, 140.37, 140.34, 140.14, 140.03 (2C), 140.01, 139.97, 139.81 (3C), 139.71 (2C), 139.53, 139.46, 137.93, 137.91, 137.69, 137.55 (2C), 135.62, 133.57, 133.38, 132.25, 128.88 (2C, aryl C), 127.43 (2C, aryl C), 127.17 (2C, aryl C), 125.98 (aryl C), 115.41 (aryl C), 111.57 (2C, aryl C), 73.83 ( $\text{sp}^3\text{-C}$  of  $\text{C}_{60}$ ), 71.26 ( $\text{sp}^3\text{-C}$  of  $\text{C}_{60}$ ), 68.28, 59.49, 40.96, 12.14; FT-IR  $\nu/\text{cm}^{-1}$  (KBr) 3407, 3012, 2883, 1599, 1501, 1455, 1429, 1384, 1311, 1252, 1185, 1144, 939, 748, 670, 527; UV-vis ( $\text{CHCl}_3$ )  $\lambda_{\text{max}}/\text{nm}$  256, 310, 431; HRMS (ESI)  $m/z$ :  $[\text{M}]^-$  Calcd for  $\text{C}_{76}\text{H}_{17}\text{N}$  943.1361; Found 943.1302.

**General Procedure for the Synthesis of Cyclopentafullerenes 5.** A mixture of  $\text{C}_{60}$  (36.0 mg, 0.05 mmol), cinnamaldehydes **1** (0.50 mmol), secondary amines **4** (1.00 mmol),  $\text{Mg}(\text{ClO}_4)_2$  (5.6 mg, 0.025 mmol) and  $\text{Fe}(\text{ClO}_4)_3 \cdot x\text{H}_2\text{O}$  (8.9 mg, 0.025 mmol) was added to a 50 mL round-bottom flask equipped with a reflux condenser and a magnetic stirrer. After they were completely dissolved in 10 mL of chlorobenzene by sonication, the resulting solution was put into an oil bath preset at 80 °C and stirred under air conditions. Thin-layer chromatography (TLC) was employed to carefully monitor the reaction and to stop the reaction at the designated time. The reaction

mixture was filtered through a silica gel plug to remove any insoluble material. After the solvent evaporation in vacuo was completed, the residue was separated on a silica gel column with carbon disulfide/dichloromethane as the eluent to afford first unreacted C<sub>60</sub> and then cyclopentafullerenes **5**.

**Cyclopentafullerene *cis*-5aa and Fulleropyrrolidine *trans*-6aa:** According to the general procedure, the reaction of C<sub>60</sub> (36.0 mg, 0.05 mmol) with **1a** (63 μL, 0.50 mmol), **4a** (103 μL, 1.00 mmol), Mg(ClO<sub>4</sub>)<sub>2</sub> (5.6 mg, 0.025 mmol) and Fe(ClO<sub>4</sub>)<sub>3</sub>·xH<sub>2</sub>O (8.9 mg, 0.025 mmol) in chlorobenzene (10 mL) at 80 °C for 60 min afforded first unreacted C<sub>60</sub> (17.9 mg, 50%) and then *cis*-**5aa**<sup>1</sup> (18.3 mg, 40%, R<sub>f</sub> = 0.82) and *trans*-**6aa**<sup>2,3</sup> (3.8 mg, 8%, R<sub>f</sub> = 0.24) as amorphous brown solid with CS<sub>2</sub> as eluent: mp > 300 °C.

**Cyclopentafullerene *cis*-5ab and Fulleropyrrolidine *trans*-6ab:** According to the general procedure, the reaction of C<sub>60</sub> (36.0 mg, 0.05 mmol) with **1a** (63 μL, 0.50 mmol), **4b** (137 μL, 1.00 mmol), Mg(ClO<sub>4</sub>)<sub>2</sub> (5.6 mg, 0.025 mmol) and Fe(ClO<sub>4</sub>)<sub>3</sub>·xH<sub>2</sub>O (8.9 mg, 0.025 mmol) in chlorobenzene (10 mL) at 80 °C for 55 min afforded first unreacted C<sub>60</sub> (22.7 mg, 63%) and then *cis*-**5ab** (13.9 mg, 30%, R<sub>f</sub> = 0.97) and *trans*-**6ab**<sup>3</sup> (trace, R<sub>f</sub> = 0.68) as amorphous brown solid with CS<sub>2</sub> as eluent: mp > 300 °C. <sup>1</sup>H NMR (500 MHz, CS<sub>2</sub>/DMSO-*d*<sub>6</sub>) δ 7.58 (d, *J* = 7.2 Hz, 2H), 7.30 (t, *J* = 7.6 Hz, 2H), 7.21 (t, *J* = 7.4 Hz, 1H), 5.04 (dd, *J* = 12.5, 4.5 Hz, 1H), 4.86 (dd, *J* = 13.4, 4.5 Hz, 1H), 3.60 (q, *J* = 12.6 Hz, 1H), 3.06 (br.s, 2H), 2.99-2.93 (m, 2H), 2.89-2.84 (m, 1H), 1.71-1.61 (m, 2H), 1.56-1.50 (m, 2H), 0.91-0.86 (m, 6H); <sup>13</sup>C NMR (125 MHz, CS<sub>2</sub>/DMSO-*d*<sub>6</sub>) (all 1C unless indicated) δ 155.39, 154.80, 153.00, 152.70,



146.17, 145.78, 145.40, 145.23, 144.81, 144.49, 144.43, 144.41, 144.34 (2C), 144.24, 144.19, 144.09, 144.03, 144.01, 143.85, 143.52, 143.45, 143.39 (2C), 143.35, 143.30 (2C), 143.17, 142.84, 142.70, 142.61, 142.52, 141.36, 141.20, 140.84, 140.79 (2C), 140.68, 140.61, 140.48 (2C), 140.39, 140.33, 140.20, 140.16, 139.99, 139.95 (2C), 139.85, 139.78, 138.15, 137.70, 137.64, 137.44, 136.09 (aryl C), 134.40, 134.00, 133.16, 132.61, 127.77 (2C, aryl C), 127.22 (2C, aryl C), 126.22 (aryl C), 75.07, 74.31, 73.36, 55.42, 29.59, 21.01 (2C), 10.72 (2C); FT-IR  $\nu/\text{cm}^{-1}$  (KBr) 2958, 2926, 2865, 2793, 1516, 1459, 1427, 1376, 1189, 1088, 1013, 759, 696, 573, 547, 527; UV-vis ( $\text{CHCl}_3$ )  $\lambda_{\text{max}}/\text{nm}$  257, 311, 431; HRMS (MALDI-TOF)  $m/z$ :  $[\text{M}]^-$  Calcd for  $\text{C}_{75}\text{H}_{23}\text{N}$  937.1831; Found 937.1832.

**Cyclopentafullerene *cis*-5ac and Fulleropyrrolidine *trans*-6ac:** According to the general procedure, the reaction of  $\text{C}_{60}$  (36.0 mg, 0.05 mmol) with **1a** (63  $\mu\text{L}$ , 0.50 mmol), **4c** (169  $\mu\text{L}$ , 1.00 mmol),  $\text{Mg}(\text{ClO}_4)_2$  (5.6 mg, 0.025 mmol) and  $\text{Fe}(\text{ClO}_4)_3 \cdot x\text{H}_2\text{O}$  (8.9 mg, 0.025 mmol) in chlorobenzene (10 mL) at 80 °C for 50 min afforded first unreacted  $\text{C}_{60}$  (17.4 mg, 48%) and then *cis*-**5ac** (21.5 mg, 45%,  $R_f = 0.97$ ) and *trans*-**6ac**<sup>3</sup> (trace,  $R_f = 0.84$ ) as amorphous brown solid with  $\text{CS}_2$  as eluent: mp > 300 °C. *cis*-**5ac**:  $^1\text{H}$  NMR (500 MHz,  $\text{CS}_2/\text{DMSO}-d_6$ )  $\delta$  7.57 (d,  $J = 7.3$  Hz, 2H), 7.29 (t,  $J = 7.0$  Hz, 2H), 7.20 (t,  $J = 7.4$  Hz, 1H), 5.03-4.99 (m, 1H), 4.84-4.81 (m, 1H), 3.57 (q,  $J = 12.6$  Hz, 1H), 3.09 (br.s, 2H), 2.94 (br.s, 2H), 2.87-2.83 (m, 1H), 1.63-1.61 (m, 2H), 1.45 (br.s, 2H), 1.33-1.26 (m, 4H), 0.87 (t,  $J = 7.1$  Hz, 6H);  $^{13}\text{C}$  NMR (125 MHz,  $\text{CS}_2/\text{DMSO}-d_6$ ) (all 1C unless indicated)  $\delta$  155.40, 154.90, 153.13, 152.77, 146.22, 145.88, 145.45, 145.28, 144.88, 144.54, 144.49, 144.46, 144.39 (2C),

144.28, 144.23, 144.15, 144.08 (2C), 143.91, 143.57, 143.51, 143.46, 143.44, 143.39, 143.35 (2C), 143.21, 142.89, 142.76, 142.67, 142.57, 141.41, 141.25, 140.88, 140.85 (2C), 140.73, 140.62, 140.55, 140.53, 140.43, 140.39, 140.25, 140.21, 139.99 (3C), 139.94, 139.84, 138.15, 137.73, 137.70, 137.48, 136.17, 134.41, 134.07, 133.25, 132.64, 127.83 (2C, aryl C), 127.28 (2C, aryl C), 126.26 (aryl C), 75.13, 74.32, 73.34, 55.49, 29.78 (2C), 29.42, 19.43 (2C), 13.06 (2C); FT-IR  $\nu/\text{cm}^{-1}$  (KBr) 2954, 2925, 2858, 1539, 1498, 1458, 1427, 1372, 1269, 1221, 1185, 1013, 896, 828, 760, 695, 573, 527; UV-vis ( $\text{CHCl}_3$ )  $\lambda_{\text{max}}/\text{nm}$  257, 311, 431; HRMS (MALDI-TOF)  $m/z$ :  $[\text{M}]^-$  Calcd for  $\text{C}_{77}\text{H}_{27}\text{N}$  965.2144; Found 965.2142.

**Cyclopentafullerene *cis*-5ad and Fulleropyrrolidine *trans*-6ad:** According to the general procedure, the reaction of  $\text{C}_{60}$  (36.0 mg, 0.05 mmol) with **1a** (63  $\mu\text{L}$ , 0.50 mmol), **4d** (129  $\mu\text{L}$ , 1.00 mmol),  $\text{Mg}(\text{ClO}_4)_2$  (5.6 mg, 0.025 mmol) and  $\text{Fe}(\text{ClO}_4)_3 \cdot x\text{H}_2\text{O}$  (8.9 mg, 0.025 mmol) in chlorobenzene (10 mL) at 80 °C for 15 min afforded first unreacted  $\text{C}_{60}$  (14.3 mg, 40%) and then *cis*-**5ad** (20.1 mg, 42%,  $R_f = 0.88$ ) and *trans*-**6ad**<sup>3</sup> (4.4 mg, 9%,  $R_f = 0.10$ ) as amorphous brown solid with  $\text{CS}_2$  as eluent: mp > 300 °C. *cis*-**5ad**:  $^1\text{H}$  NMR (500 MHz,  $\text{CS}_2/\text{DMSO}-d_6$ )  $\delta$  7.59 (d,  $J = 7.2$  Hz, 2H), 7.32-7.28 (m, 4H), 7.22-7.13 (m, 4H), 5.08 (d,  $J = 11.2$  Hz, 1H), 4.85 (d,  $J = 12.6$  Hz, 1H), 4.31 (d,  $J = 13.3$  Hz, 1H), 4.13 (d,  $J = 13.3$  Hz, 1H), 3.62 (q,  $J = 12.5$  Hz, 1H), 2.95-2.93 (m, 1H), 2.78 (s, 3H);  $^{13}\text{C}$  NMR (125 MHz,  $\text{CS}_2/\text{DMSO}-d_6$ ) (all  $^{13}\text{C}$  unless indicated)  $\delta$  155.33, 154.68, 152.93, 152.71, 145.94, 145.88, 145.51, 145.38, 144.96, 144.55 (3C), 144.47 (2C), 144.35, 144.30, 144.23, 144.19, 144.13, 143.97, 143.64, 143.60, 143.55, 143.51, 143.48, 143.43 (2C), 143.33, 142.92, 142.83,

142.77, 142.63, 141.45, 141.33, 140.98, 140.92 (2C), 140.82, 140.73, 140.62, 140.57, 140.52, 140.45, 140.33, 140.28, 140.15, 140.13, 140.07, 140.06, 139.93, 138.19, 137.98, 137.86, 137.61, 137.44, 136.17, 134.58, 134.41, 133.36, 132.88, 127.93 (2C, aryl C), 127.36 (4C, aryl C), 126.98 (2C, aryl C), 126.35 (aryl C), 125.94 (aryl C), 75.83, 74.24, 73.57, 55.39, 29.06; FT-IR  $\nu/\text{cm}^{-1}$  (KBr) 3027, 2922, 2848, 2787, 1602, 1538, 1494, 1454, 1427, 1359, 1217, 1184, 1071, 1027, 967, 907, 739, 696, 573, 527; UV-vis ( $\text{CHCl}_3$ )  $\lambda_{\text{max}}/\text{nm}$  257, 310, 431; HRMS (MALDI-TOF)  $m/z$ :  $[\text{M}]^-$  Calcd for  $\text{C}_{77}\text{H}_{19}\text{N}$  957.1518; Found 957.1515.

**Cyclopentafullerene *cis*-5ae and Fulleropyrrolidine *trans*-6ae:** According to the general procedure, the reaction of  $\text{C}_{60}$  (36.0 mg, 0.05 mmol) with **1a** (63  $\mu\text{L}$ , 0.50 mmol), **4e** (192  $\mu\text{L}$ , 1.00 mmol),  $\text{Mg}(\text{ClO}_4)_2$  (5.6 mg, 0.025 mmol) and  $\text{Fe}(\text{ClO}_4)_3 \cdot x\text{H}_2\text{O}$  (8.9 mg, 0.025 mmol) in chlorobenzene (10 mL) at 80 °C for 150 min afforded first unreacted  $\text{C}_{60}$  (18.1 mg, 50%) and then *trans*-**6ae**<sup>3</sup> (5.9 mg, 11%,  $R_f$  = 0.89) and *cis*-**5ae** (15.4 mg, 30%,  $R_f$  = 0.75) as amorphous brown solid with  $\text{CS}_2$  as eluent: mp > 300 °C. *cis*-**5ae**:  $^1\text{H}$  NMR (500 MHz,  $\text{CS}_2/\text{DMSO-}d_6$ )  $\delta$  7.58 (d,  $J$  = 7.3 Hz, 2H), 7.38 (d,  $J$  = 7.1 Hz, 4H), 7.30 (t,  $J$  = 7.7 Hz, 2H), 7.22-7.12 (m, 7H), 5.08 (dd,  $J$  = 12.6, 4.5 Hz, 1H), 4.76 (dd,  $J$  = 13.5, 4.4 Hz, 1H), 3.96-3.92 (m, 2H), 3.66 (q,  $J$  = 12.6 Hz, 1H), 3.03-2.99 (m, 1H);  $^{13}\text{C}$  NMR (125 MHz,  $\text{CS}_2/\text{DMSO-}d_6$ ) (all 1C unless indicated)  $\delta$  154.40, 154.12, 151.95, 151.42, 145.26, 145.22, 144.84, 144.72, 144.14, 143.96, 143.88, 143.82 (2C), 143.76, 143.67, 143.61, 143.59, 143.52, 143.45, 143.25, 142.99, 142.95, 142.85, 142.81, 142.74 (3C), 142.66, 142.18 (2C), 142.07, 141.94, 140.72, 140.65, 140.33, 140.25 (2C), 140.14, 140.06, 139.99, 139.88 (2C),

139.76, 139.67 (2C), 139.52, 139.35 (4C), 137.33, 137.11 (2C), 136.98, 136.79, 136.74, 135.54, 134.11, 133.89, 132.54, 131.91, 127.38 (2C, aryl C), 127.05 (aryl C), 126.89 (4C, aryl C), 126.50 (5C, aryl C), 125.92 (aryl C), 125.58 (2C, aryl C), 73.01, 72.96, 71.50, 54.76, 27.82; FT-IR  $\nu/\text{cm}^{-1}$  (KBr) 3025, 2921, 2847, 2798, 1493, 1454, 1428, 1365, 1184, 1151, 1070, 1025, 970, 905, 782, 739, 696, 572, 526; UV-vis ( $\text{CHCl}_3$ )  $\lambda_{\text{max}}/\text{nm}$  257, 312, 432; HRMS (MALDI-TOF)  $m/z$ :  $[\text{M}]^-$  Calcd for  $\text{C}_{83}\text{H}_{23}\text{N}$  1033.1831; Found 1033.1831.

**Cyclopentafullerene *cis*-5af:** According to the general procedure, the reaction of  $\text{C}_{60}$  (36.0 mg, 0.05 mmol) with **1a** (63  $\mu\text{L}$ , 0.50 mmol), **4f** (108  $\mu\text{L}$ , 1.00 mmol),  $\text{Mg}(\text{ClO}_4)_2$  (5.6 mg, 0.025 mmol) and  $\text{Fe}(\text{ClO}_4)_3 \cdot x\text{H}_2\text{O}$  (8.9 mg, 0.025 mmol) in ODCB (6 mL) at 180 °C for 120 min afforded first unreacted  $\text{C}_{60}$  (20.6 mg, 57%) and then *cis*-**5af** (8.5 mg, 18%,  $R_f = 0.87$ ) as amorphous brown solid with  $\text{CS}_2$  as eluent: mp > 300 °C. *cis*-**5af**:  $^1\text{H}$  NMR (500 MHz,  $\text{CS}_2/\text{DMSO}-d_6$ )  $\delta$  7.64 (d,  $J = 7.5$  Hz, 2H), 7.32 (t,  $J = 7.6$  Hz, 2H), 7.23 (t,  $J = 7.3$  Hz, 1H), 7.13 (t,  $J = 7.9$  Hz, 2H), 7.06 (d,  $J = 8.4$  Hz, 2H), 6.65 (t,  $J = 7.2$  Hz, 1H), 6.19 (dd,  $J = 12.3, 4.5$  Hz, 1H), 5.07 (dd,  $J = 13.4, 4.4$  Hz, 1H), 3.97 (q,  $J = 12.5$  Hz, 1H), 3.35 (s, 3H), 2.93-2.89 (m, 1H);  $^{13}\text{C}$  NMR (125 MHz,  $\text{CS}_2/\text{DMSO}-d_6$ ) (all 1C unless indicated)  $\delta$  154.20, 154.00, 152.80, 152.35, 148.49 (aryl C), 145.35, 145.29, 145.20 (2C), 145.02, 144.40, 144.35, 144.32 (2C), 144.28, 144.19, 144.14, 144.10 (2C), 143.89, 143.81, 143.52, 143.48 (2C), 143.38, 143.33, 143.25 (3C), 142.73, 142.62, 142.55, 142.51, 141.28, 141.18, 140.79, 140.76 (2C), 140.69, 140.54, 140.47, 140.39, 140.30 (2C), 140.14, 140.11, 140.02, 139.97, 139.91, 139.77 (2C), 138.16 (2C), 137.81, 137.43, 135.81, 134.43, 134.34,

133.59, 132.83, 127.81 (2C, aryl C), 127.73 (2C, aryl C), 127.25 (2C, aryl C), 126.31 (aryl C), 116.81 (aryl C), 112.61 (2C, aryl C), 73.86, 73.77, 71.60, 54.28, 33.06, 31.81; FT-IR  $\nu/\text{cm}^{-1}$  (KBr) 3026, 2807, 1594, 1503, 1426, 1400, 1314, 1242, 1184, 1156, 1121, 1089, 1009, 963, 748, 693, 572, 526; UV-vis ( $\text{CHCl}_3$ )  $\lambda_{\text{max}}/\text{nm}$  256, 307, 430; HRMS (MALDI-TOF)  $m/z$ :  $[\text{M}]^-$  Calcd for  $\text{C}_{76}\text{H}_{17}\text{N}$  943.1361; Found 943.1362.

**Cyclopentafullerene *cis*-5ag:** According to the general procedure, the reaction of  $\text{C}_{60}$  (36.0 mg, 0.05 mmol) with **1a** (63  $\mu\text{L}$ , 0.50 mmol), **4g** (126  $\mu\text{L}$ , 1.00 mmol),  $\text{Mg}(\text{ClO}_4)_2$  (5.6 mg, 0.025 mmol) and  $\text{Fe}(\text{ClO}_4)_3 \cdot x\text{H}_2\text{O}$  (8.9 mg, 0.025 mmol) in ODCB (6 mL) at 180 °C for 100 min afforded first unreacted  $\text{C}_{60}$  (27.2 mg, 76%) and then *cis*-**5ag** (6.8 mg, 14%,  $R_f = 0.91$ ) as amorphous brown solid with  $\text{CS}_2$  as eluent: mp > 300 °C. *cis*-**5ag**:  $^1\text{H}$  NMR (500 MHz,  $\text{CS}_2/\text{DMSO}-d_6$ )  $\delta$  7.64 (d,  $J = 7.4$  Hz, 2H), 7.32 (t,  $J = 7.4$  Hz, 2H), 7.23 (t,  $J = 7.2$  Hz, 1H), 7.11 (t,  $J = 7.6$  Hz, 2H), 7.06 (d,  $J = 8.1$  Hz, 2H), 6.63 (t,  $J = 6.9$  Hz, 1H), 6.19 (dd,  $J = 12.1, 3.9$  Hz, 1H), 5.05 (dd,  $J = 13.3, 3.9$  Hz, 1H), 4.14-4.07 (m, 1H), 3.94 (q,  $J = 12.3$  Hz, 1H), 3.76-3.69 (m, 1H), 2.99-2.96 (m, 1H), 1.31 (t,  $J = 6.8$  Hz, 3H);  $^{13}\text{C}$  NMR (125 MHz,  $\text{CS}_2/\text{DMSO}-d_6$ ) (all 1C unless indicated)  $\delta$  154.18, 153.71, 152.73, 152.14, 146.12 (aryl C), 145.05 (3C), 144.91, 144.77, 144.11, 144.05, 144.02 (2C), 143.97, 143.89, 143.84, 143.81 (2C), 143.61, 143.52, 143.18 (3C), 143.09, 143.04, 142.98, 142.93, 142.90, 142.45, 142.32, 142.24 (2C), 140.99, 140.89, 140.48 (3C), 140.40, 140.27, 140.17, 140.11, 140.02 (2C), 139.85 (2C), 139.71, 139.69, 139.61, 139.47, 139.40, 137.80 (2C), 137.54, 137.13, 135.55, 134.09, 134.05, 133.32, 132.31, 127.58 (4C, aryl C), 127.03 (2C, aryl C), 126.12 (aryl C), 116.54 (aryl C), 113.40 (2C, aryl C), 73.56 (2C), 70.78, 54.06,

32.21, 12.38; FT-IR  $\nu/\text{cm}^{-1}$  (KBr) 3028, 2968, 2923, 2848, 1595, 1539, 1497, 1456, 1427, 1373, 1305, 1268, 1231, 1189, 1157, 1122, 1094, 1009, 745, 696, 573, 527; UV-vis ( $\text{CHCl}_3$ )  $\lambda_{\text{max}}/\text{nm}$  257, 310, 431; HRMS (MALDI-TOF)  $m/z$ :  $[\text{M}]^-$  Calcd for  $\text{C}_{77}\text{H}_{19}\text{N}$  957.1518; Found 957.1516.

**Cyclopentafullerene *cis*-5ba and Fulleropyrrolidine *trans*-6ba:** According to the general procedure, the reaction of  $\text{C}_{60}$  (36.0 mg, 0.05 mmol) with **1b** (81.1 mg, 0.50 mmol), **4a** (103  $\mu\text{L}$ , 1.00 mmol),  $\text{Mg}(\text{ClO}_4)_2$  (5.6 mg, 0.025 mmol) and  $\text{Fe}(\text{ClO}_4)_3 \cdot x\text{H}_2\text{O}$  (8.9 mg, 0.025 mmol) in chlorobenzene (10 mL) at 80 °C for 120 min afforded first unreacted  $\text{C}_{60}$  (21.3 mg, 59%) and then *cis*-**5ba**<sup>1,4</sup> (16.2 mg, 34%,  $R_f = 0.31$ ) and *trans*-**6ba**<sup>2,3</sup> (trace,  $R_f = 0.06$ ) as amorphous brown solid with  $\text{CS}_2$  as eluent: mp > 300 °C.

**Cyclopentafullerene *cis*-5ca and Fulleropyrrolidine *trans*-6ca:** According to the general procedure, the reaction of  $\text{C}_{60}$  (36.0 mg, 0.05 mmol) with **1c** (88.6 mg, 0.50 mmol), **4a** (103  $\mu\text{L}$ , 1.00 mmol),  $\text{Mg}(\text{ClO}_4)_2$  (11.2 mg, 0.05 mmol) and  $\text{Fe}(\text{ClO}_4)_3 \cdot x\text{H}_2\text{O}$  (17.8 mg, 0.05 mmol) in chlorobenzene (10 mL) at 80 °C for 35 min afforded first unreacted  $\text{C}_{60}$  (6.8 mg, 19%) and then *cis*-**5ca**<sup>1</sup> (6.4 mg, 13%,  $R_f = 0.15$ ) and *trans*-**6ca**<sup>2,3</sup> (20.0 mg, 42%,  $R_f = 0.12$ ) as amorphous brown solid with  $\text{CS}_2$  as eluent: mp > 300 °C.

**Reaction of  $\text{C}_{60}$  with Cinnamaldehyde (1a) and Triethylamine in the Presence of  $\text{Mg}(\text{ClO}_4)_2$ .** By following the same experimental procedure as for the reaction of  $\text{C}_{60}$  with amines **2/4**, the reaction of  $\text{C}_{60}$  (36.0 mg, 0.05 mmol) with **1a** (63  $\mu\text{L}$ , 0.50 mmol), triethylamine (69  $\mu\text{L}$ , 0.50 mmol) and  $\text{Mg}(\text{ClO}_4)_2$  (44.7 mg, 0.20 mmol) in *o*-

dichlorobenzene (6 mL) at 180 °C for 60 min afforded first unreacted C<sub>60</sub> (20.6 mg, 57%) and then *cis*-**5aa**<sup>1</sup> (9.9 mg, 22%, R<sub>f</sub> = 0.82) and *trans*-**6aa**<sup>2,3</sup> (1.5 mg, 3%, R<sub>f</sub> = 0.24) as amorphous brown solid with CS<sub>2</sub> as eluent: mp > 300 °C.

**Cyclopentafullerene *cis*-7:** By following the same experimental procedure as for the reaction of C<sub>60</sub> with amines **2/4**, the reaction of *cis*-**3aa** (11.6 mg, 0.0125 mmol) with benzoyl chloride (29 μL, 0.250 mmol) and DMAP (7.6 mg, 0.0625 mmol) in chlorobenzene (5 mL) at 120 °C for 24 h afforded first unreacted *cis*-**3aa** (2.3 mg, 20%, R<sub>f</sub> = 0.98) and then *cis*-**7** (10.2 mg, 79%, R<sub>f</sub> = 0.36) as an amorphous brown solid (mp > 300 °C) with CS<sub>2</sub>/CH<sub>2</sub>Cl<sub>2</sub> as eluent (V/V = 10/1). *cis*-**7**: <sup>1</sup>H NMR (500 MHz, CS<sub>2</sub>/DMSO-*d*<sub>6</sub>) δ 7.48 (d, *J* = 7.4 Hz, 2H), 7.28-7.17 (m, 7H), 7.10-7.00 (m, 6H), 5.12 (dd, *J* = 13.6, 4.2 Hz, 1H), 3.47-3.40 (m, 1H), 2.90-2.86 (m, 1H); <sup>13</sup>C NMR (125 MHz, CS<sub>2</sub>/DMSO-*d*<sub>6</sub>) (all 1C unless indicated) δ 169.84 (C=O), 156.28, 153.70, 152.86, 152.21, 145.64 (2C), 145.59, 145.22, 145.04, 144.70, 144.61, 144.56 (3C), 144.46, 144.39 (3C), 144.25, 144.02, 143.87, 143.72, 143.66, 143.57, 143.50, 143.49, 143.42, 143.04, 142.91, 142.79 (2C), 141.48 (2C), 141.23, 141.03 (3C), 140.96, 140.91, 140.79, 140.69, 140.57, 140.34, 140.24, 140.16, 140.11, 140.03, 139.95, 139.60 (aryl C), 138.21, 138.10, 137.83, 137.82, 135.88 (aryl C), 135.02, 134.89, 134.54, 134.32, 132.43 (aryl C), 129.80 (2C, aryl C), 128.07 (aryl C), 128.01 (2C, aryl C), 127.78 (2C, aryl C), 127.39 (2C, aryl C), 127.03 (2C, aryl C), 126.61 (aryl C), 126.51 (aryl C), 126.39 (2C, aryl C), 74.43, 73.36, 66.37, 54.32, 33.29; FT-IR ν/cm<sup>-1</sup> (KBr) 2920, 2849, 1644, 1593, 1491, 1453, 1426, 1337, 1267, 1218, 1180, 1155, 1108, 1073, 1016, 783, 762, 734, 697, 574, 527; UV-vis (CHCl<sub>3</sub>) λ<sub>max</sub>/nm 257, 310,

433; HRMS (MALDI-TOF)  $m/z$ :  $[M]^-$  Calcd for  $C_{82}H_{19}NO$  1033.1467; Found 1033.1468.

**Cyclopentafullerene 8:** By following the same experimental procedure as for the reaction of  $C_{60}$  with amines **2/4**, the reaction of *cis*-**3aa** (11.6 mg, 0.0125 mmol) with paraformaldehyde (0.8 mg, 0.0250 mmol) and  $TsOH \cdot H_2O$  (2.4 mg, 0.0125 mmol) in chlorobenzene (5 mL) at 40 °C for 1.5 h afforded first unreacted *cis*-**3aa** (2.5 mg, 22%,  $R_f = 0.98$ ) and then **8** (7.5 mg, 63%, *cis-ortho-8/trans-ortho-8* = 10.5/1,  $R_f = 0.86$ ) as an amorphous brown solid (mp > 300 °C) with  $CS_2/CH_2Cl_2$  as eluent (V/V = 10/1). *cis-ortho-8*:  $^1H$  NMR (500 MHz,  $CS_2/DMSO-d_6$ )  $\delta$  7.63 (d,  $J = 7.4$  Hz, 2H), 7.31 (t,  $J = 7.7$  Hz, 2H), 7.24-7.16 (m, 2H), 7.11 (t,  $J = 8.0$  Hz, 1H), 6.91-6.82 (m, 2H), 5.84 (dd,  $J = 12.4, 4.6$  Hz, 1H), 5.56 (d,  $J = 10.6$  Hz, 1H), 4.95-4.87 (m, 1H), 4.67 (d,  $J = 10.6$  Hz, 1H), 3.91 (q,  $J = 12.8$  Hz, 1H), 3.03-2.98 (m, 1H);  $^{13}C$  NMR (125 MHz,  $CS_2/DMSO-d_6$ ) (all 1C unless indicated)  $\delta$  154.55, 154.38, 152.87, 152.08, 146.08, 145.79, 145.71, 145.63, 145.26, 144.88, 144.75 (3C), 144.70, 144.63 (2C), 144.49, 144.47, 144.33, 144.17 (2C), 144.01, 143.88 (2C), 143.85 (2C), 143.72, 143.67 (2C), 143.12, 143.03 (2C), 142.99, 141.68, 141.60, 141.22 (2C), 141.14, 141.10, 140.90 (2C), 140.77, 140.75, 140.66, 140.60, 140.55, 140.40 (2C), 140.37, 140.23, 140.18, 138.74, 138.35, 138.21, 137.89, 136.03, 135.24, 134.83, 133.84, 133.69, 128.17 (2C, aryl C), 127.52 (2C, aryl C), 126.55 (aryl C), 126.38 (aryl C), 124.04 (aryl C), 123.73 (aryl C), 120.03 (aryl C), 118.07 (aryl C), 74.90, 74.18, 73.69, 66.54, 55.12, 32.35; FT-IR  $\nu/cm^{-1}$  (KBr) 2919, 2849, 1603, 1491, 1455, 1427, 1270, 1225, 1179, 1056,



1030, 921, 750, 697, 575, 526; UV-vis (CHCl<sub>3</sub>)  $\lambda_{\text{max}}$ /nm 257, 307, 431; HRMS (MALDI-TOF)  $m/z$ : [M]<sup>-</sup> Calcd for C<sub>76</sub>H<sub>17</sub>NO 959.1310; Found 959.1311.

**Transformation of *cis*-3aa in the Presence of Mg(ClO<sub>4</sub>)<sub>2</sub>.** By following the same experimental procedure as for the reaction of C<sub>60</sub> with amines **2/4**, the reaction of *cis*-**3aa** (18.6 mg, 0.02 mmol) with Mg(ClO<sub>4</sub>)<sub>2</sub> (9.0 mg, 0.04 mmol) in *o*-dichlorobenzene (6 mL) at 180 °C for 60 min afforded first *trans*-**3aa** (4.3 mg, 24%, R<sub>f</sub> = 0.68) and then unreacted *cis*-**3aa** (11.5 mg, 62%, R<sub>f</sub> = 0.59) as amorphous brown solid with CS<sub>2</sub> as eluent: mp > 300 °C.

**Transformation of *trans*-3aa in the Presence of Mg(ClO<sub>4</sub>)<sub>2</sub>.** By following the same experimental procedure as for the reaction of C<sub>60</sub> with amines **2/4**, the reaction of *trans*-**3aa** (18.6 mg, 0.02 mmol) with Mg(ClO<sub>4</sub>)<sub>2</sub> (9.0 mg, 0.04 mmol) in *o*-dichlorobenzene (6 mL) at 180 °C for 60 min afforded first C<sub>60</sub> (1.3 mg, 9%) and then unreacted *trans*-**3aa** (1.7 mg, 8%, R<sub>f</sub> = 0.68), *cis*-**3aa** (7.4 mg, 40%, R<sub>f</sub> = 0.59) as amorphous brown solid with CS<sub>2</sub> as eluent: mp > 300 °C.

## References

- 1 M. Zhang, H.-Y. Zhang, H.-J. Wang, F.-B. Li, Y. Huang, L. Liu, C.-Y. Liu, A. M. Asiri and K. A. Alamry, *New J. Chem*, 2018, **42**, 9291.
- 2 M. Zhang, H.-J. Wang, F.-B. Li, X.-X. Zhong, Y.-S. Huang, L. Liu, C.-Y. Liu, A. M. Asiri and K. A. *Org. Biomol. Chem.*, 2018, **16**, 2975.
- 3 W. Ma, D. Zhang, H.-J. Wang, F.-B. Li, L. Liu, X.-F. Liu, C.-Y. Liu, A. M. Asiri and K. A. Alamry, *ChemistrySelect*, 2019, **4**, 5240.
- 4 G.-W. Wang, X.-P. Chen and X. Cheng, *Chem. Eur. J*, 2006, **12**, 7246.

## Typical MALDI-TOF MS of cyclopentafullerenes

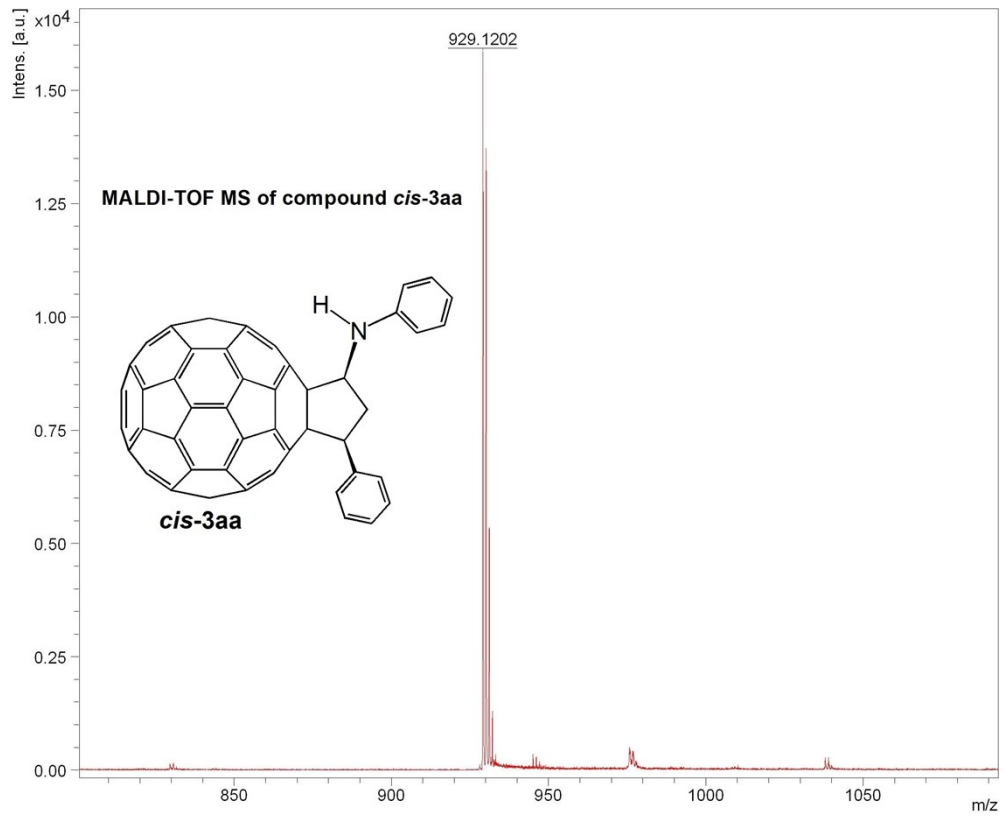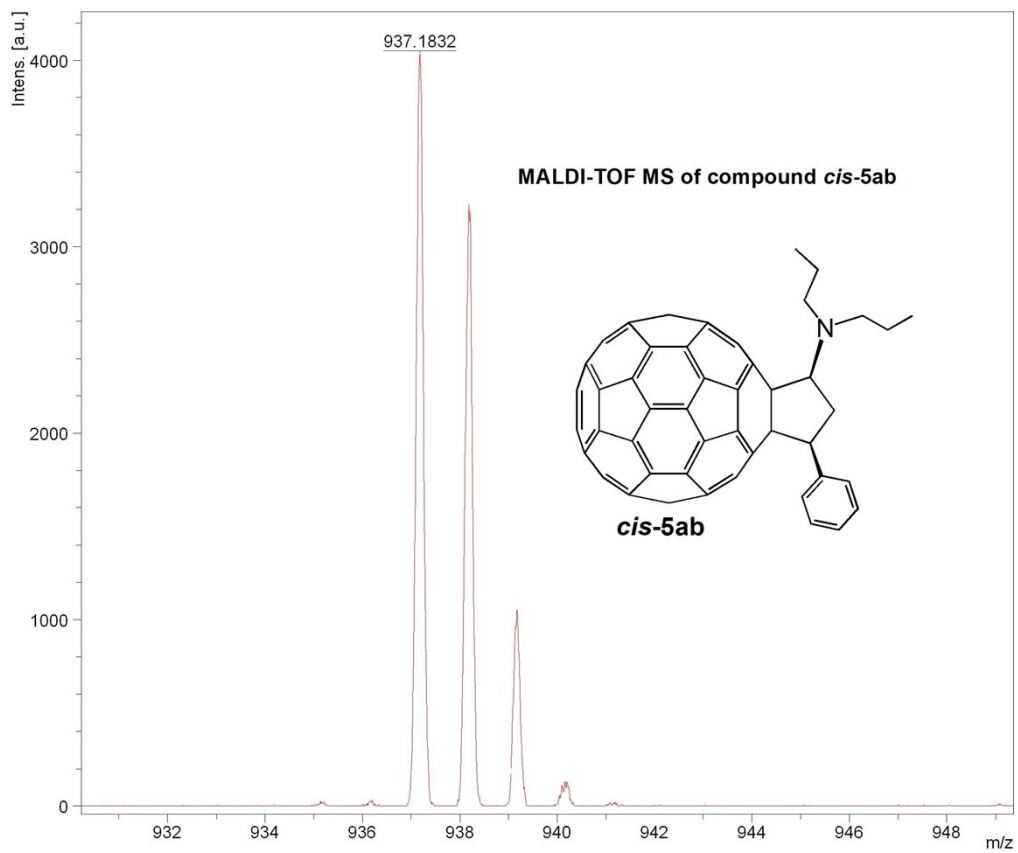

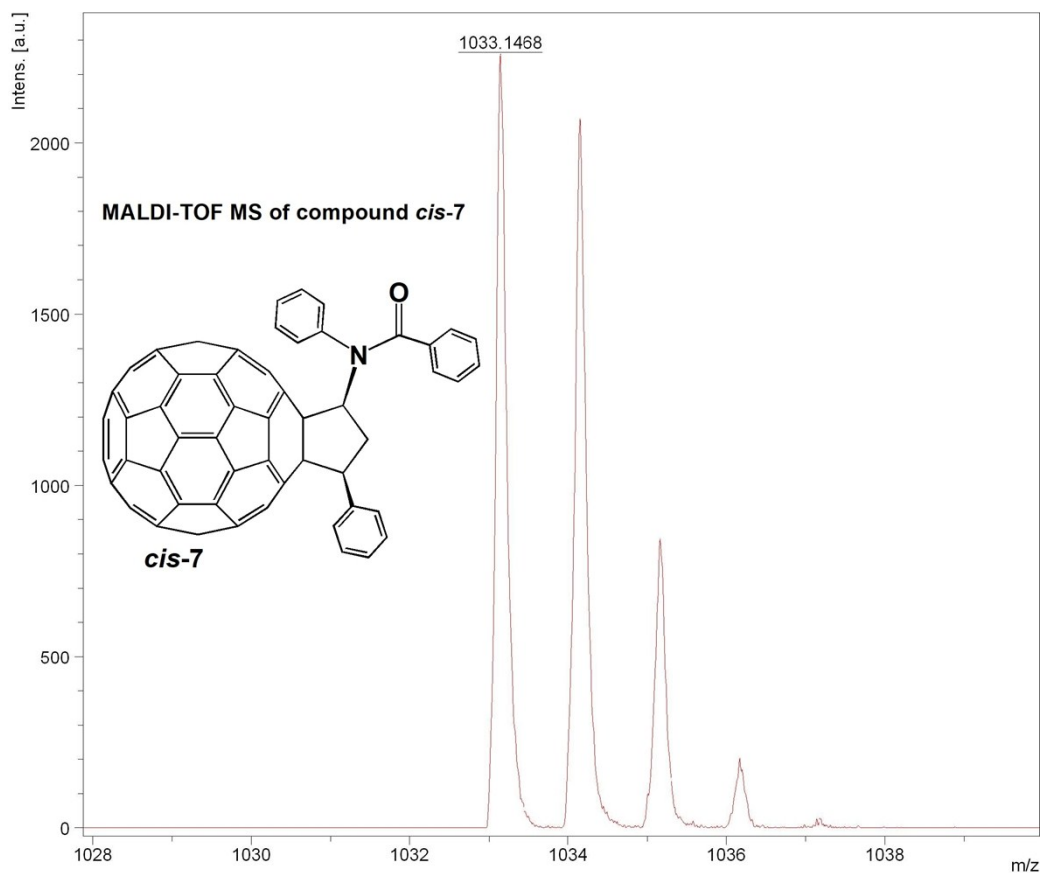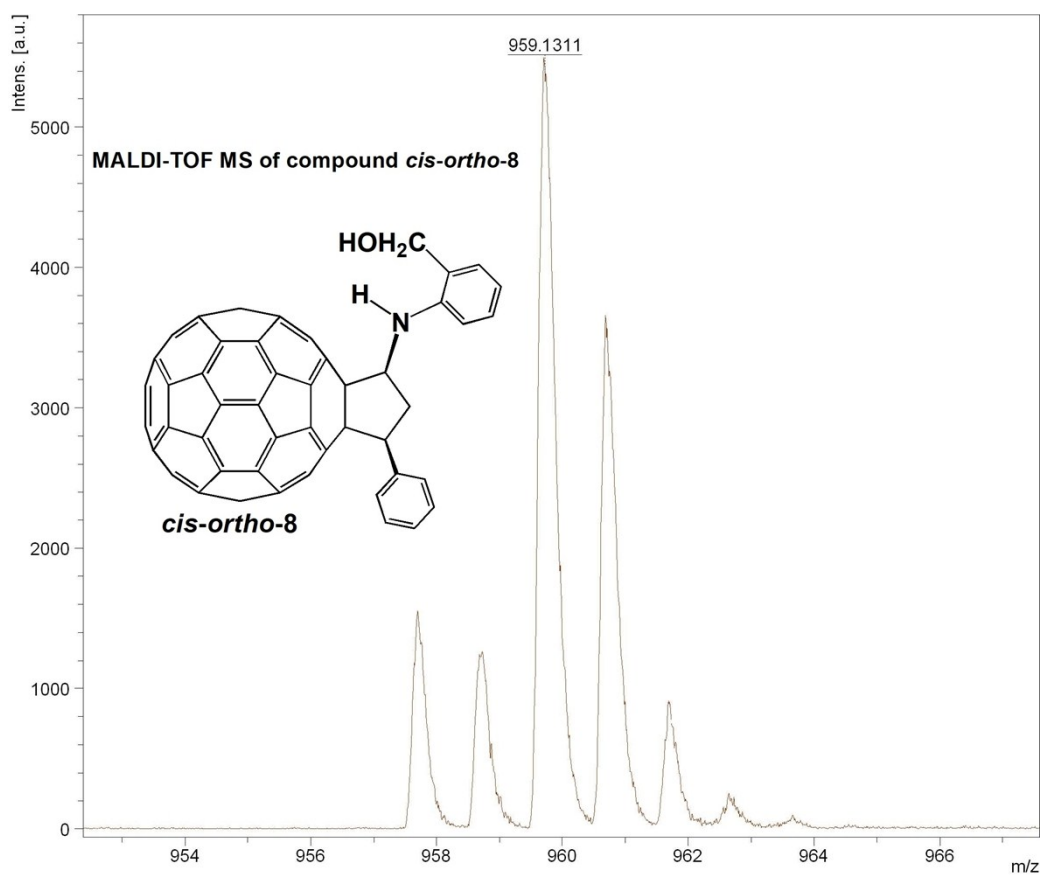

Typical UV-vis spectra of cyclopentafullerenes

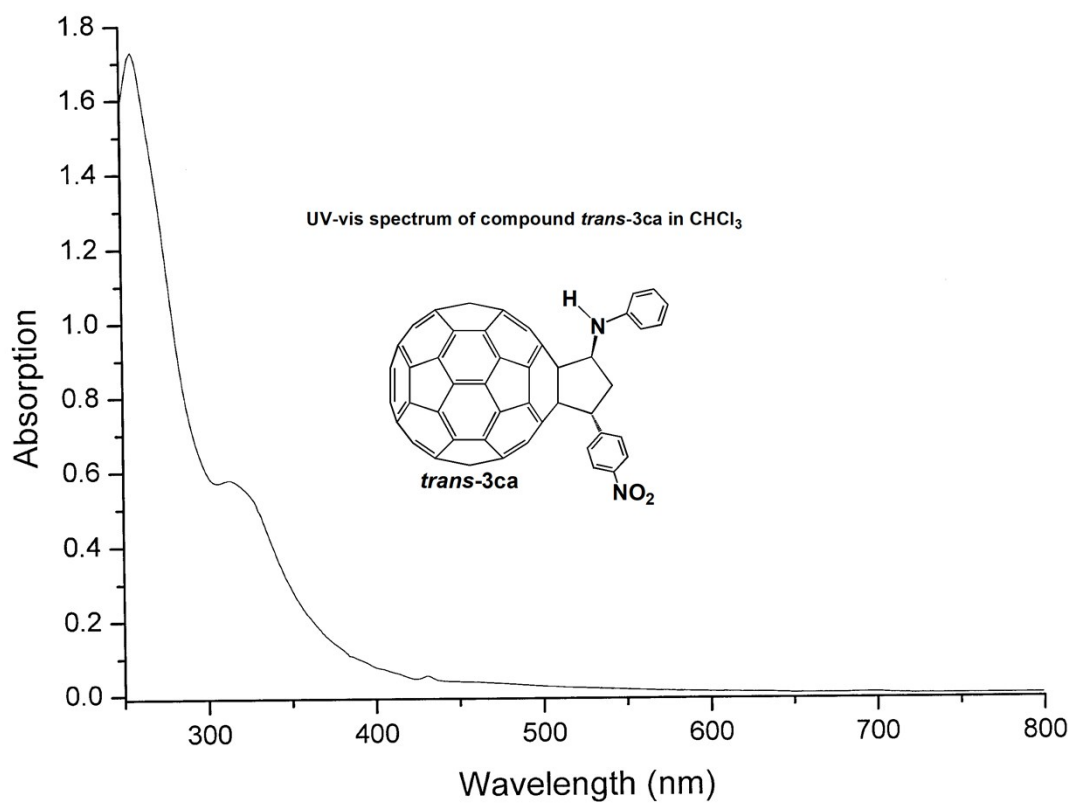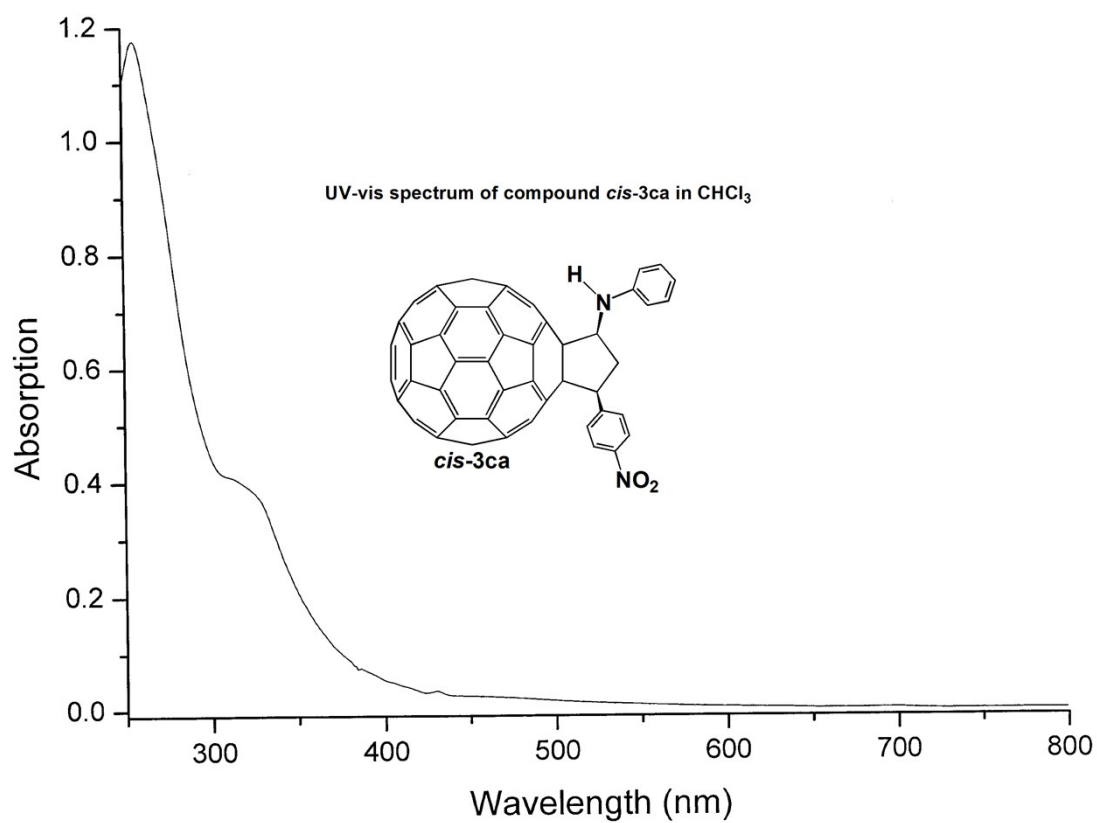

$^1\text{H}$  NMR (500 MHz,  $\text{CS}_2/\text{DMSO-}d_6$ ) spectrum of compound *trans*-**3aa**

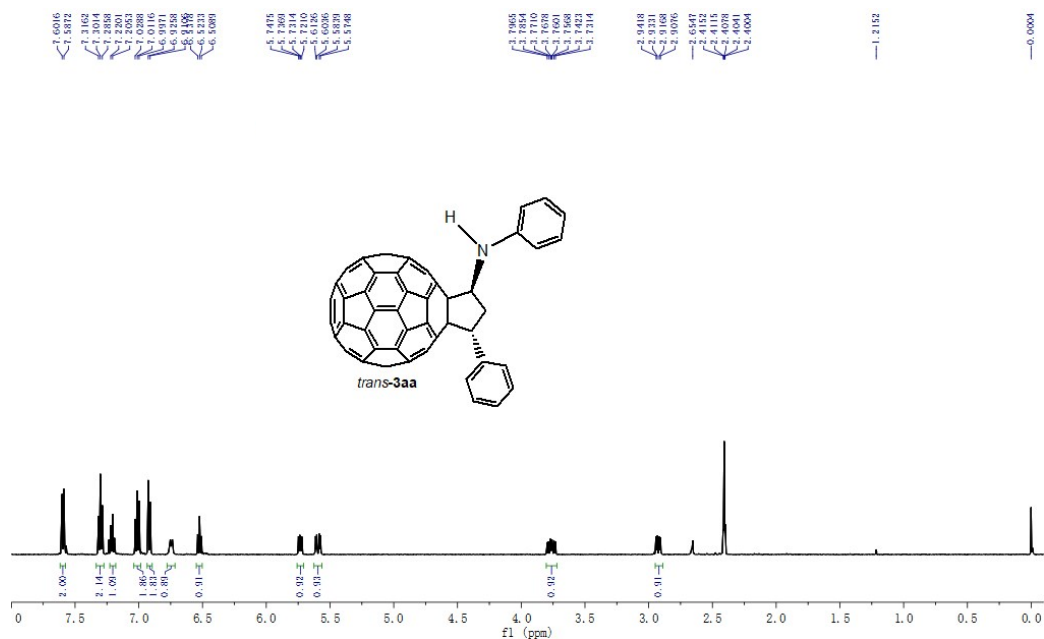

$^{13}\text{C}$  NMR (125 MHz,  $\text{CS}_2/\text{DMSO-}d_6$ ) spectrum of compound *trans*-**3aa**

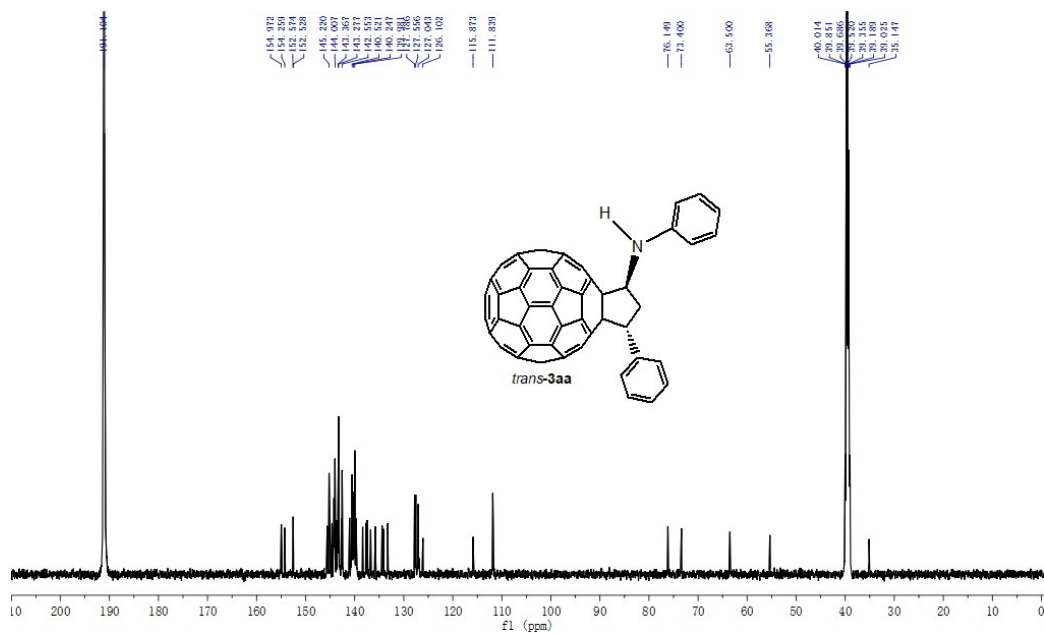

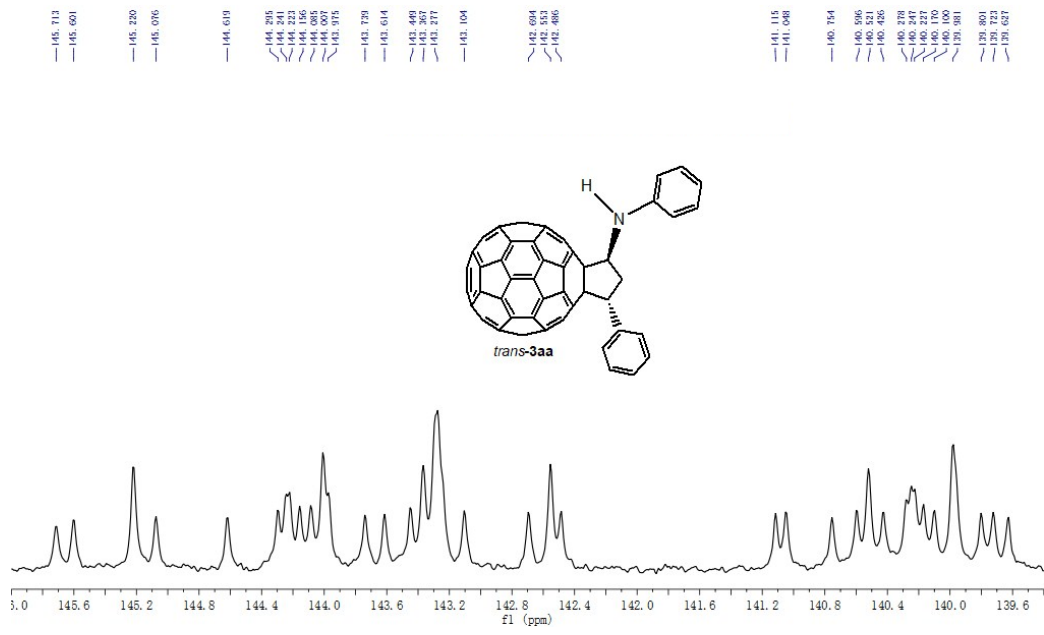

$^1\text{H}$  NMR (500 MHz,  $\text{CS}_2/\text{DMSO}-d_6$ ) spectrum of compound *cis-3aa*

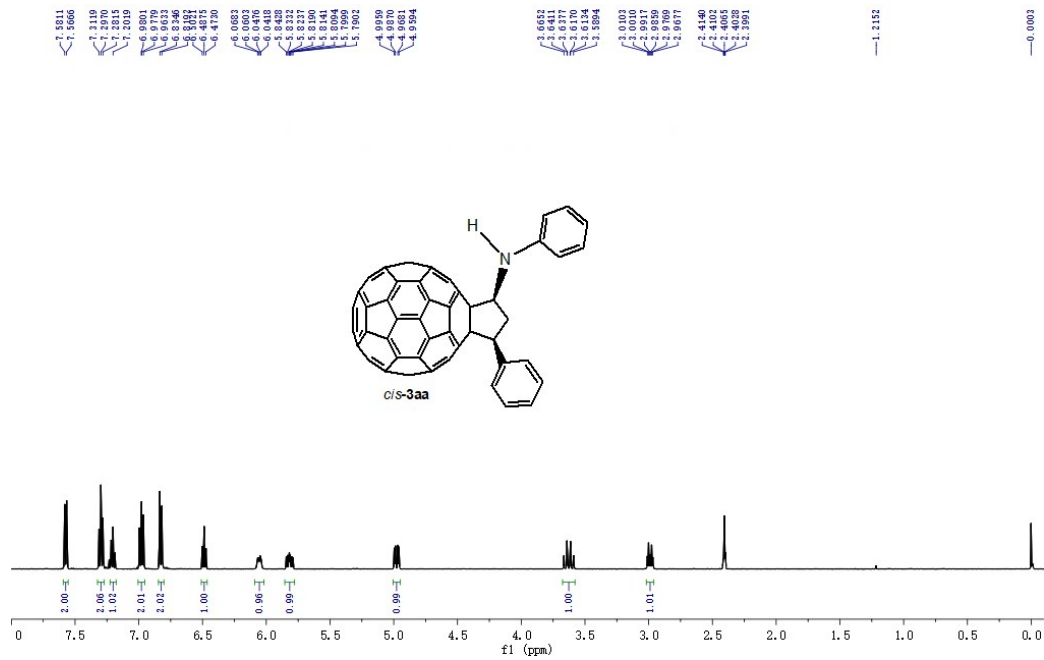

$^{13}\text{C}$  NMR (125 MHz,  $\text{CS}_2/\text{DMSO-}d_6$ ) spectrum of compound *cis*-**3aa**

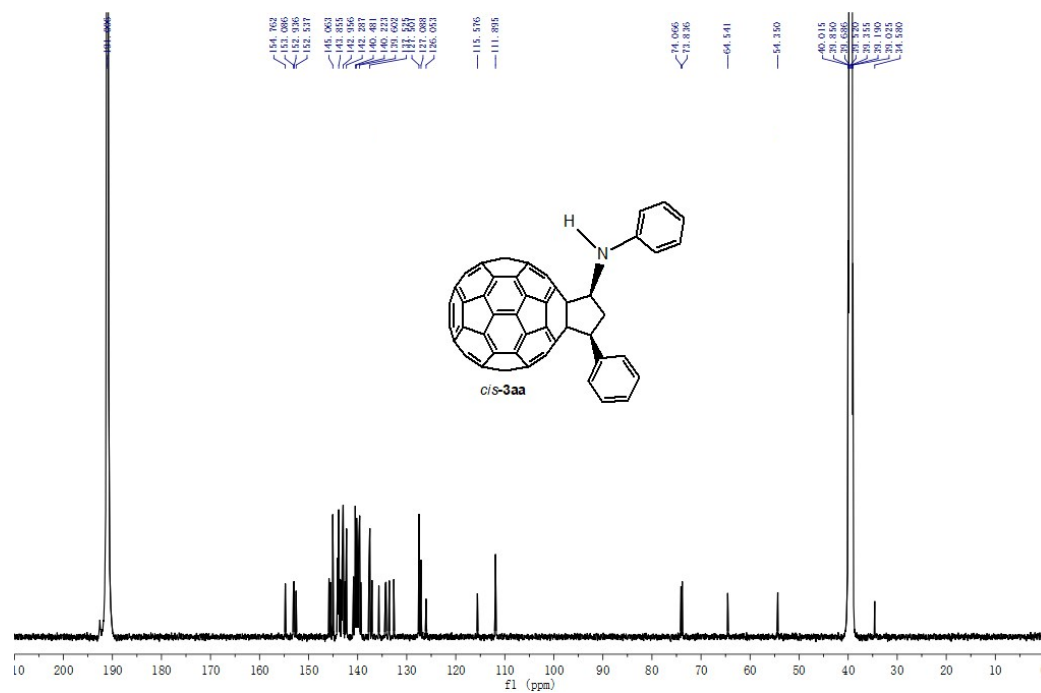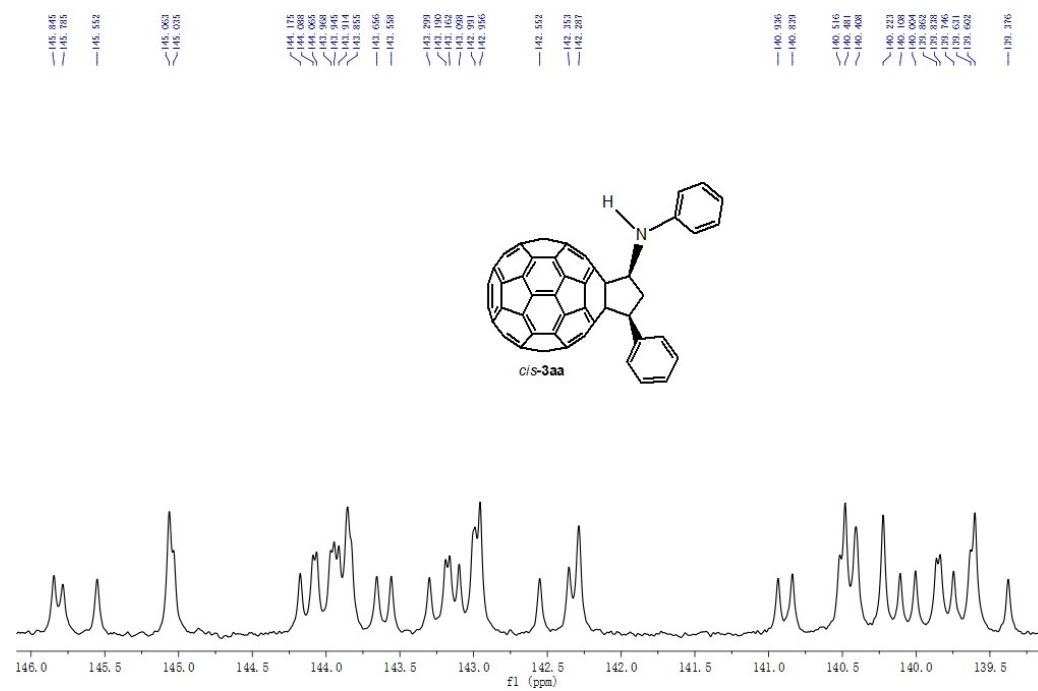





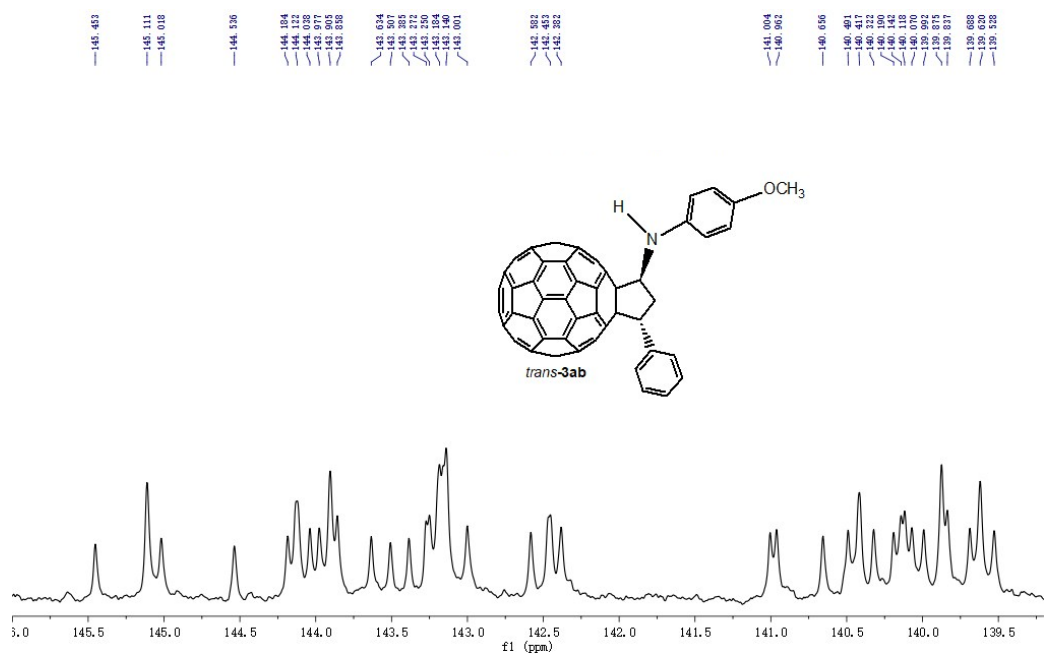

<sup>1</sup>H NMR (500 MHz, CS<sub>2</sub>/DMSO-*d*<sub>6</sub>) spectrum of compound *cis*-**3ab**

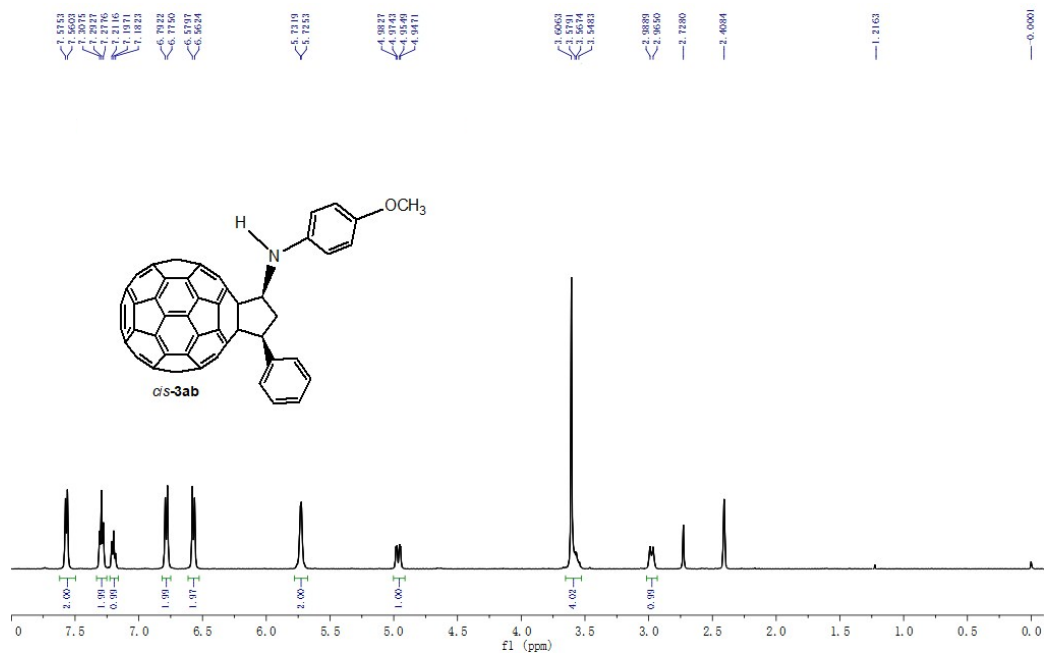

$^{13}\text{C}$  NMR (125 MHz,  $\text{CS}_2/\text{DMSO-}d_6$ ) spectrum of compound *cis*-**3ab**

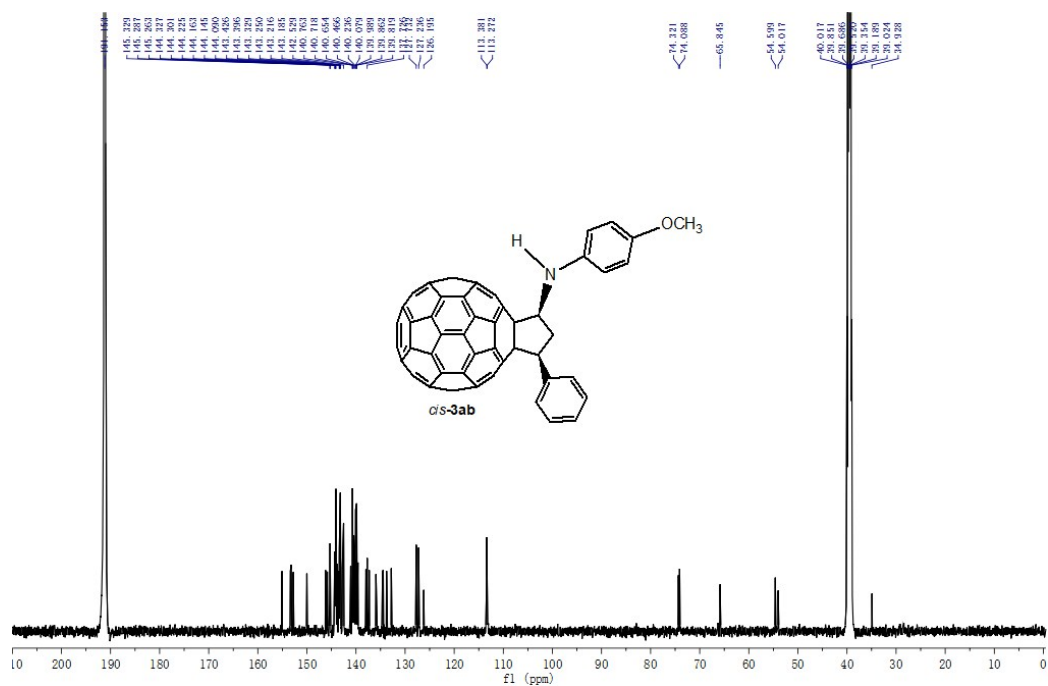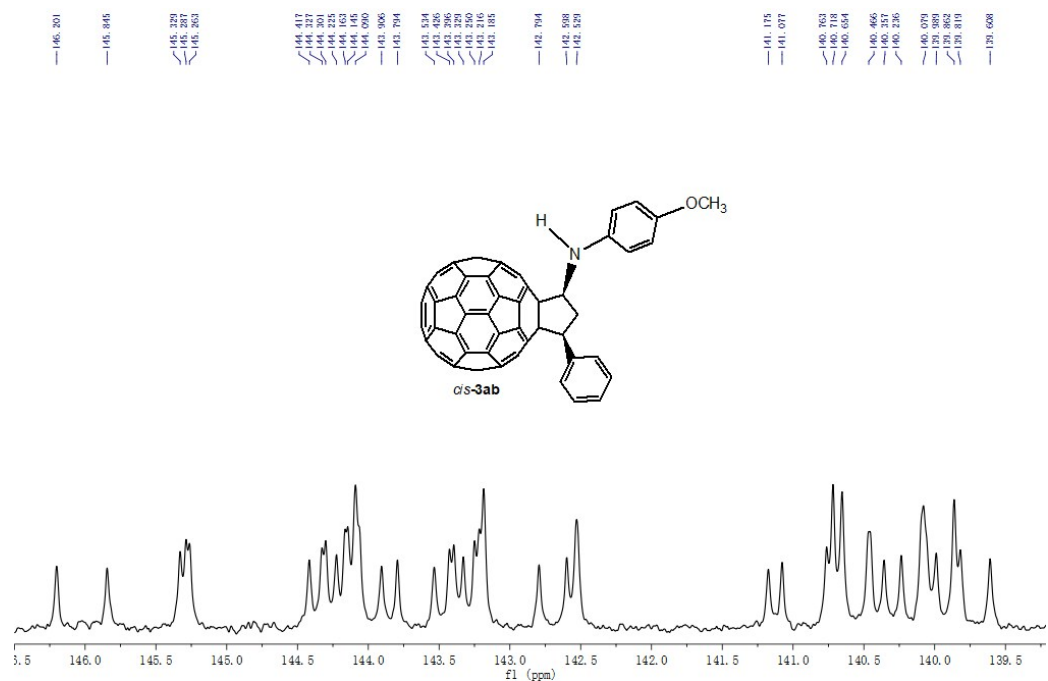

$^1\text{H}$  NMR (500 MHz,  $\text{CS}_2/\text{DMSO-}d_6$ ) spectrum of compound *trans/cis*-**3ac**

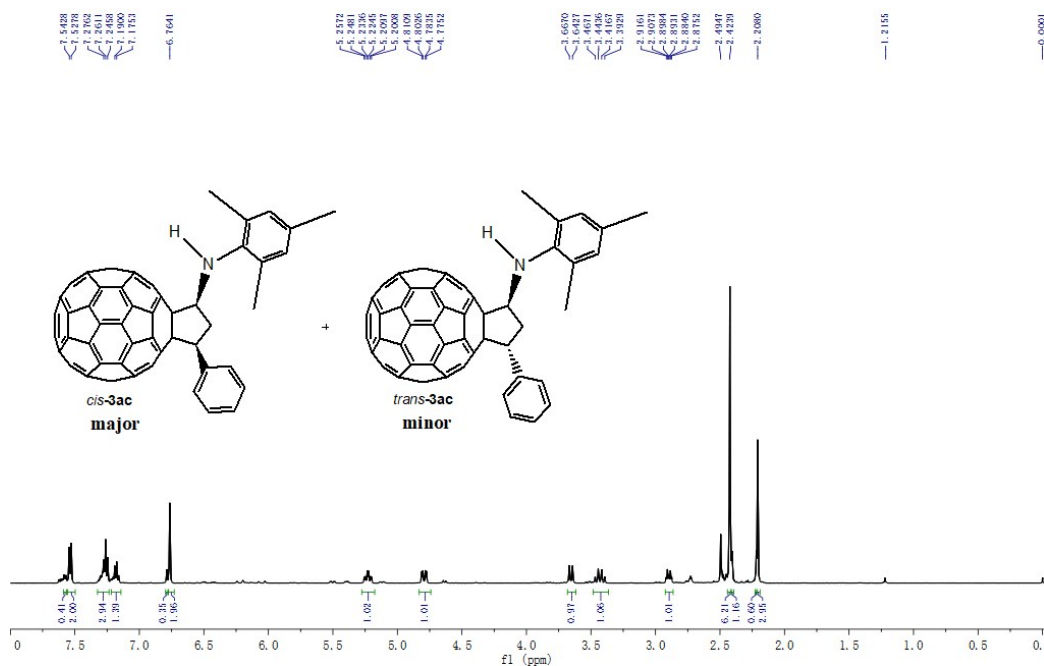

NOESY (500 MHz,  $\text{CS}_2/\text{DMSO-}d_6$ ) spectrum of *trans/cis*-**3ac**

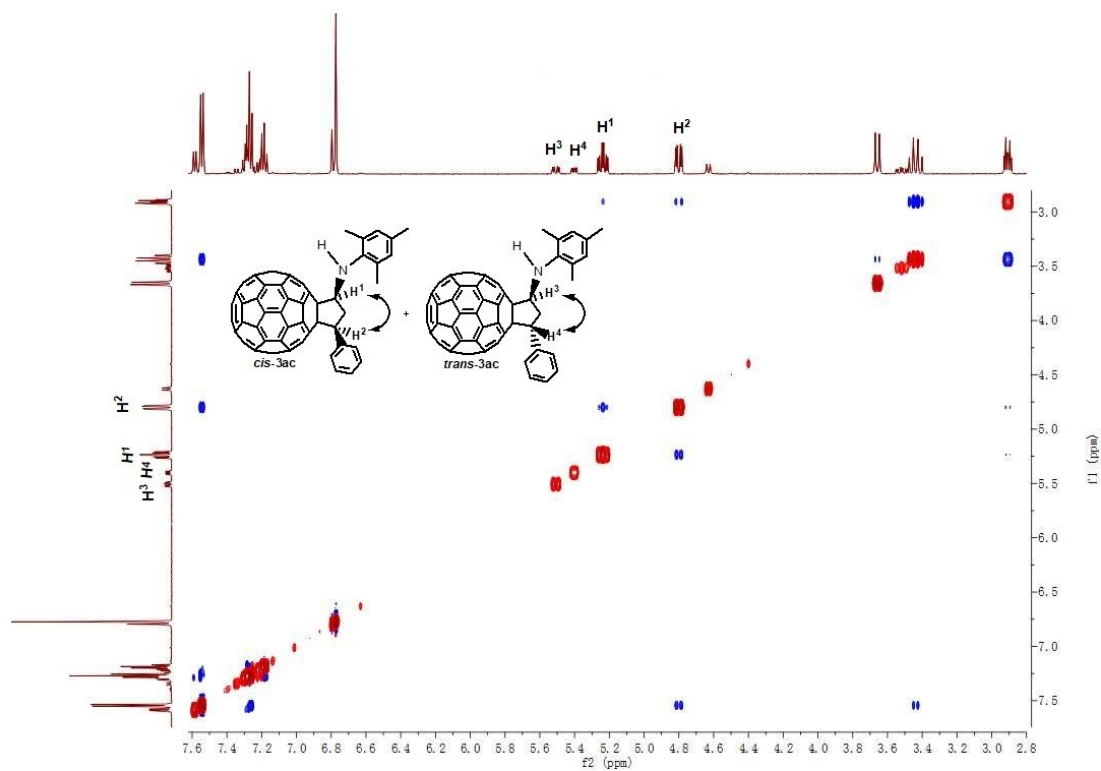



$^1\text{H}$  NMR (500 MHz,  $\text{CS}_2/\text{DMSO}-d_6$ ) spectrum of compound *trans*-**3ad**

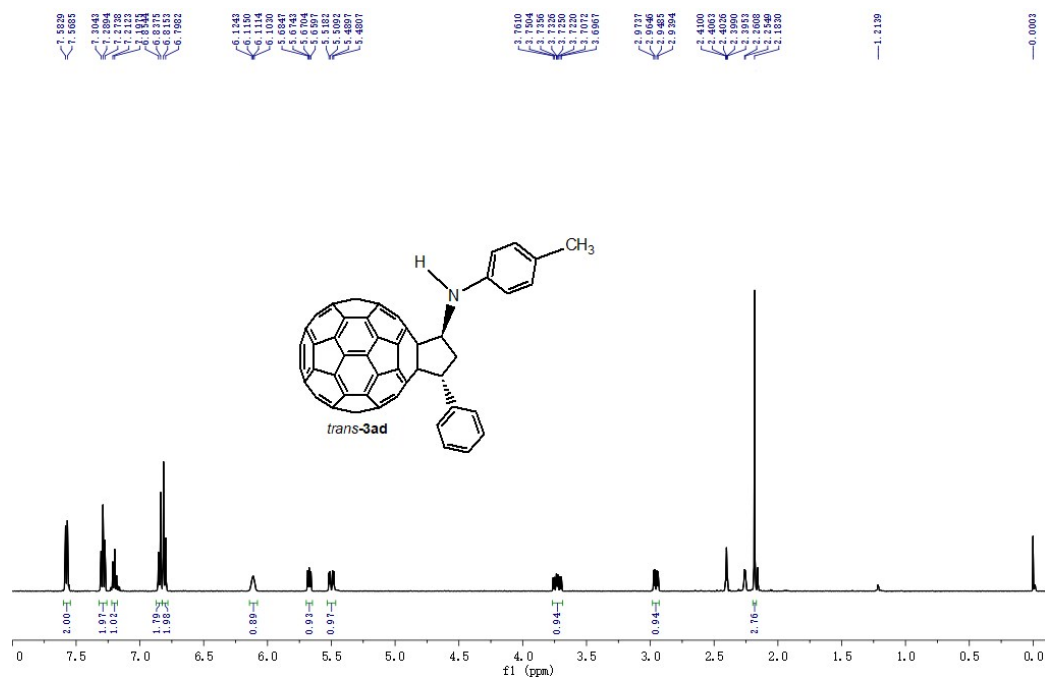

$^{13}\text{C}$  NMR (125 MHz,  $\text{CS}_2/\text{DMSO}-d_6$ ) spectrum of compound *trans*-**3ad**

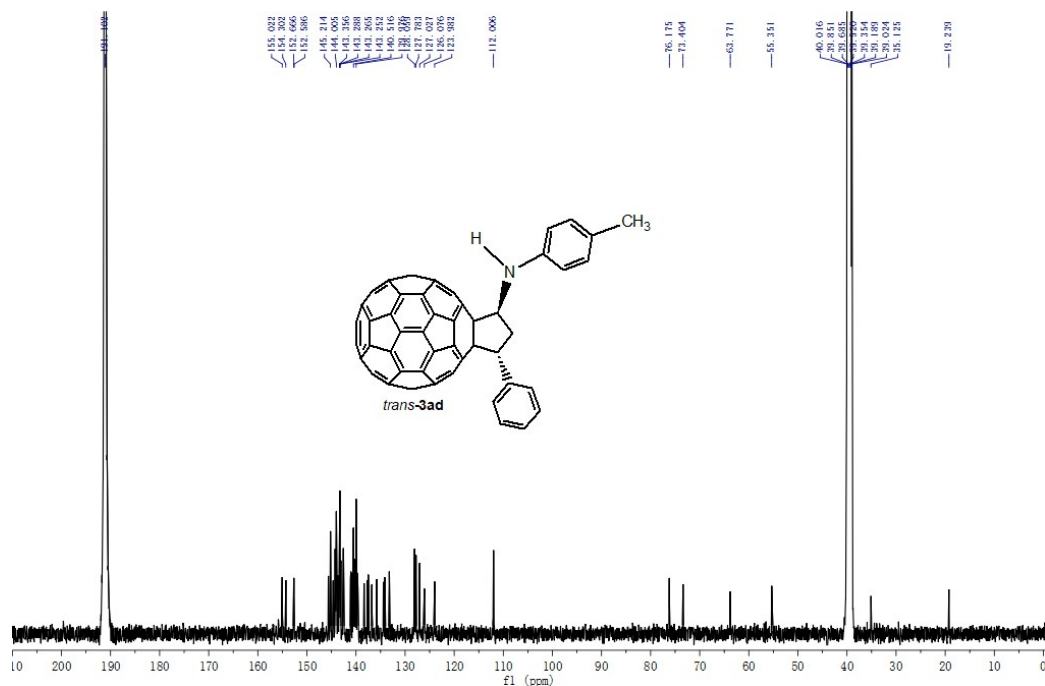

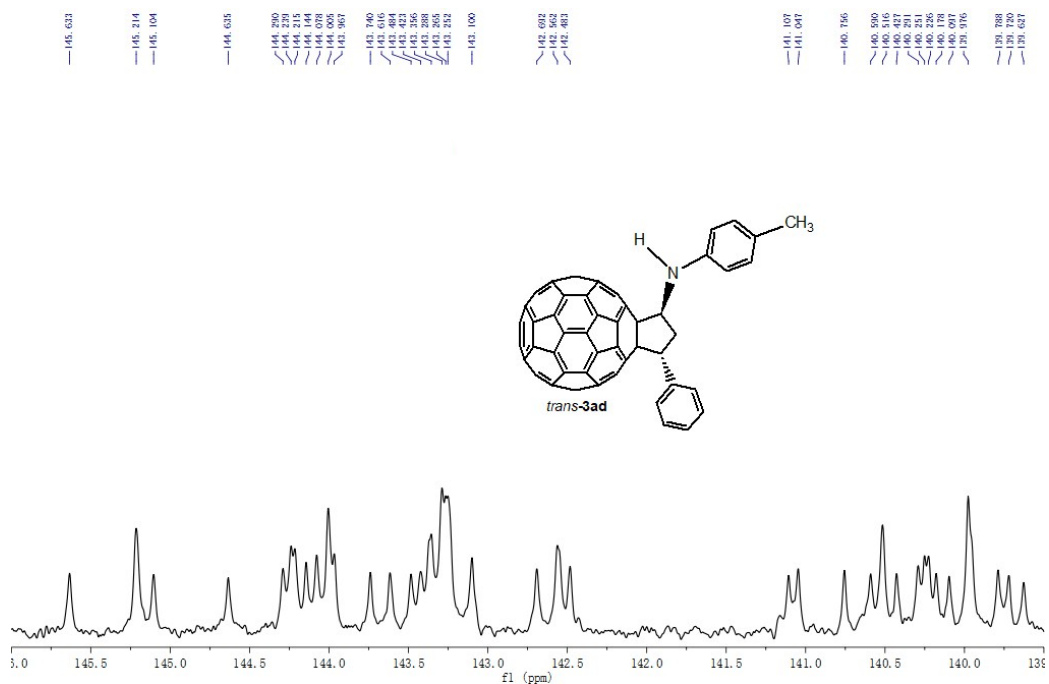

$^1\text{H}$  NMR (500 MHz,  $\text{CS}_2/\text{DMSO-}d_6$ ) spectrum of compound *cis-3ad*

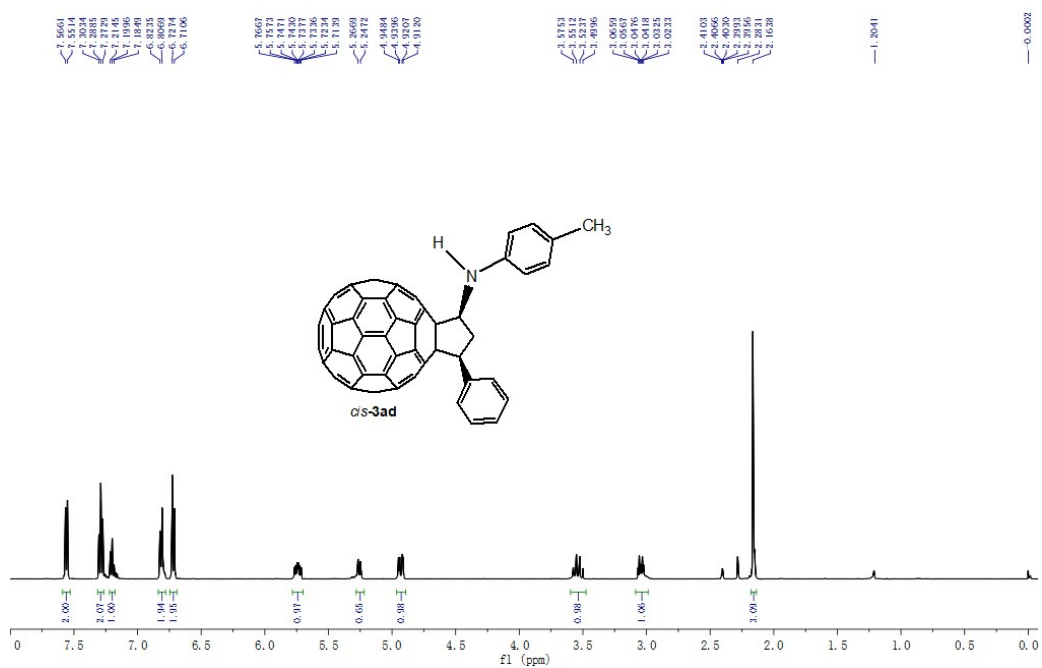

$^{13}\text{C}$  NMR (125 MHz,  $\text{CS}_2/\text{DMSO-}d_6$ ) spectrum of compound *cis-3ad*

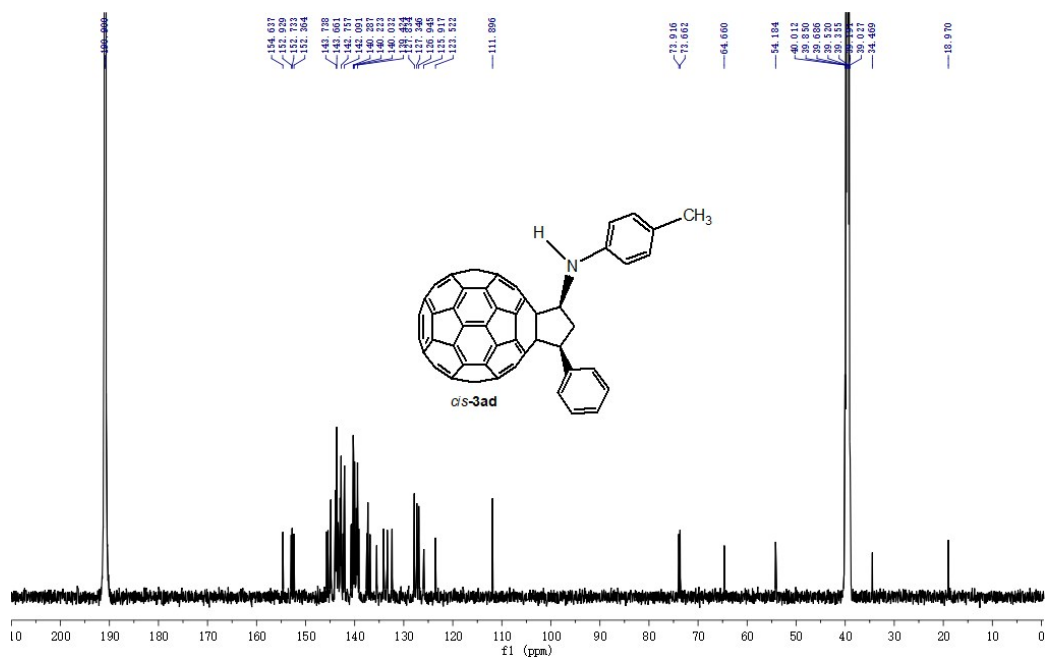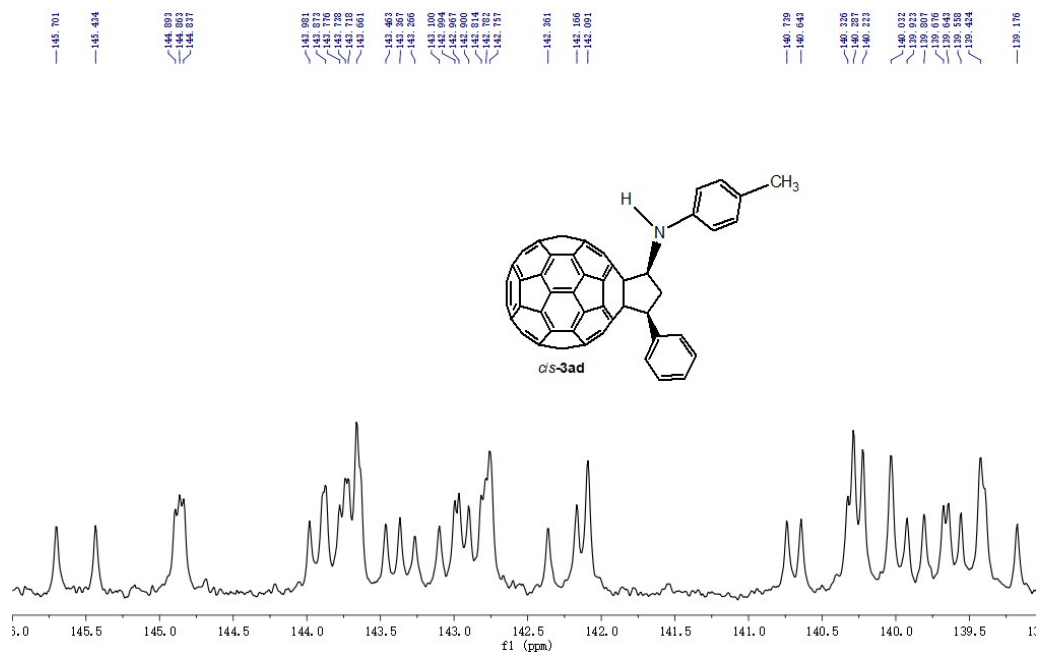

$^1\text{H}$  NMR (500 MHz,  $\text{CS}_2/\text{DMSO-}d_6$ ) spectrum of compound *trans-3ae*

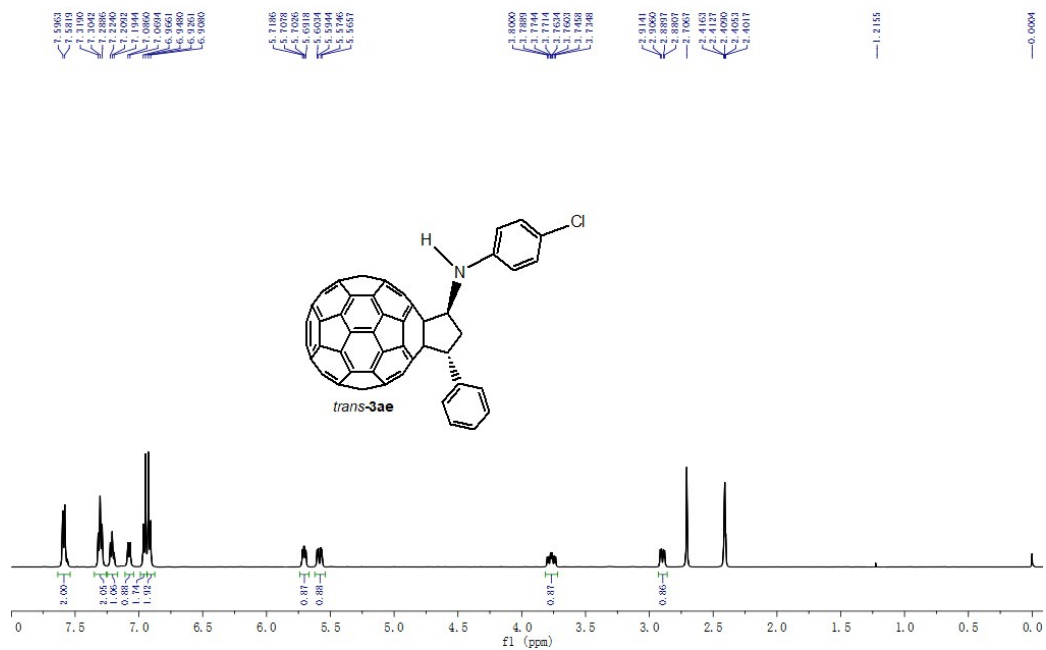

$^{13}\text{C}$  NMR (125 MHz,  $\text{CS}_2/\text{DMSO-}d_6$ ) spectrum of compound *trans-3ae*

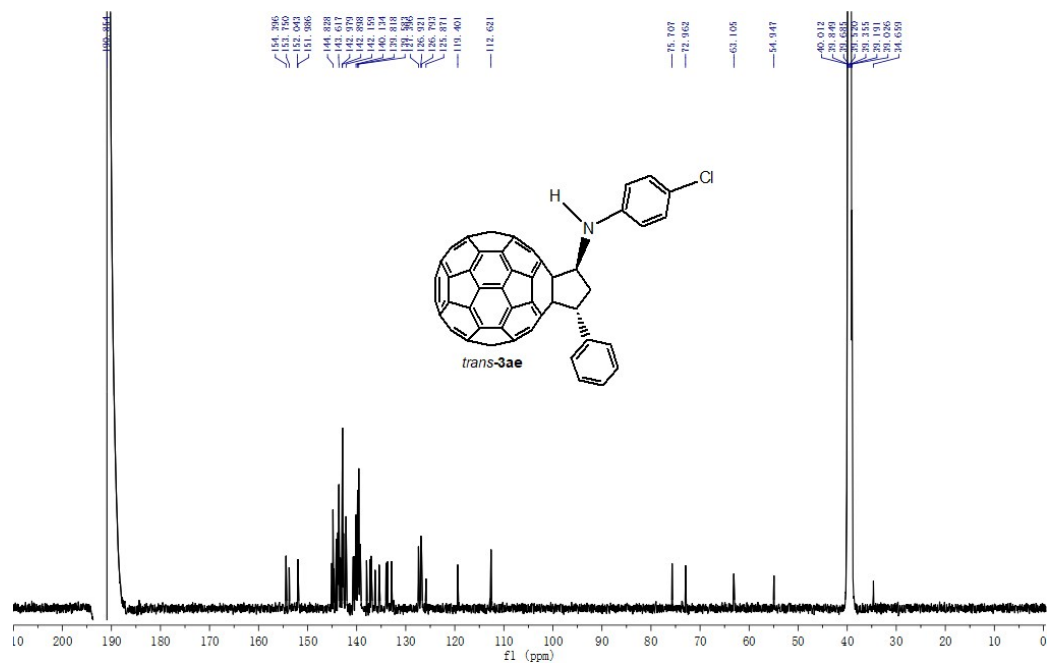



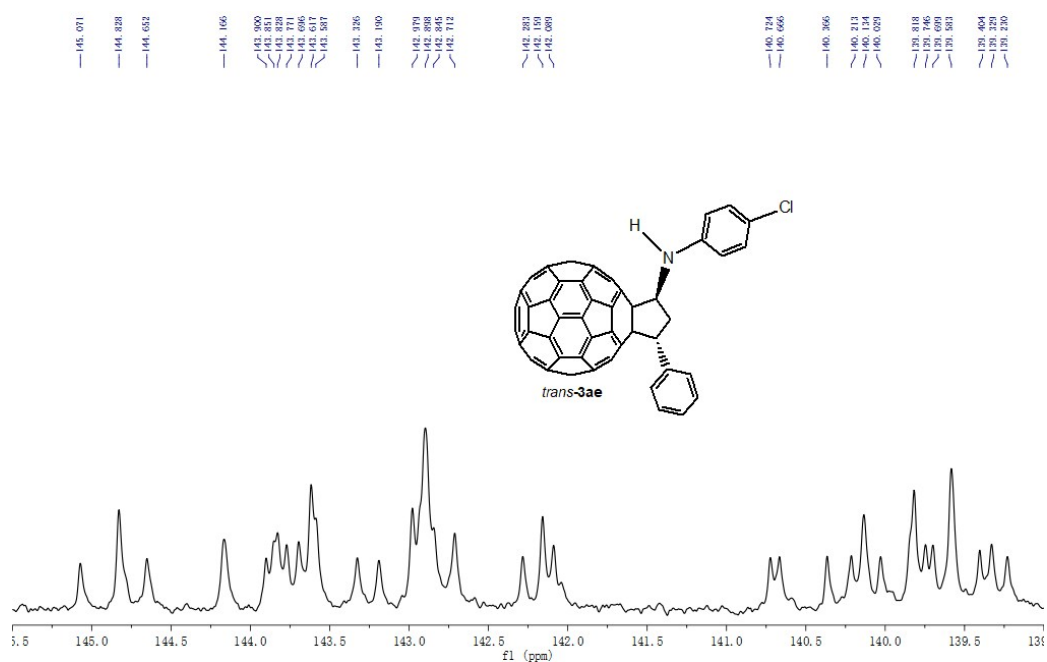

<sup>1</sup>H NMR (500 MHz, CS<sub>2</sub>/DMSO-*d*<sub>6</sub>) spectrum of compound *cis*-**3ae**

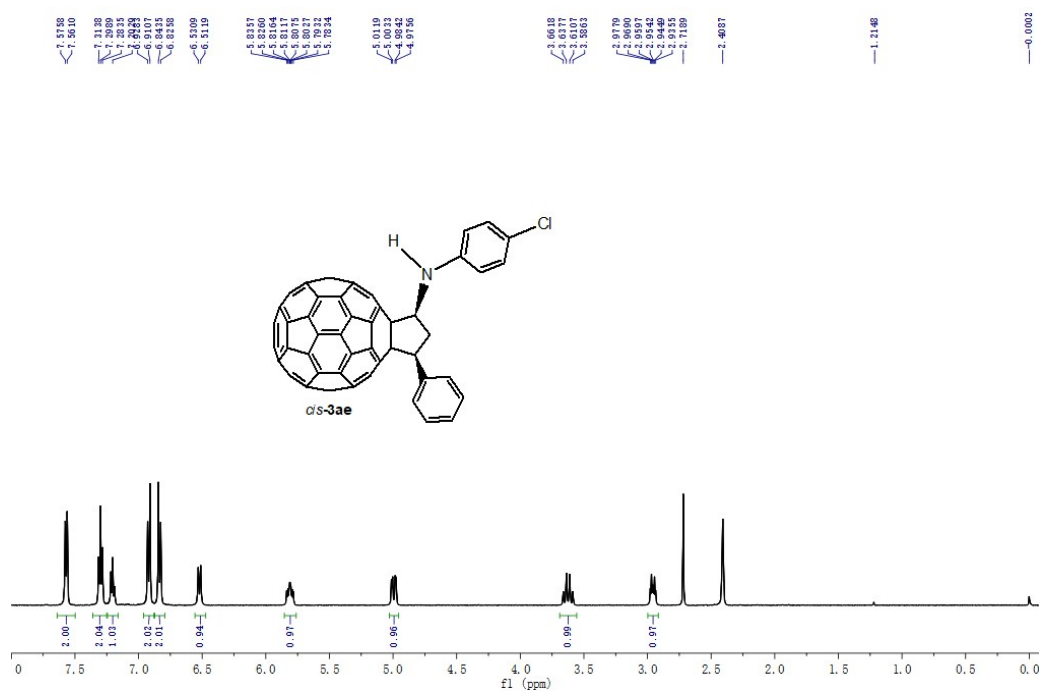

$^{13}\text{C}$  NMR (125 MHz,  $\text{CS}_2/\text{DMSO-}d_6$ ) spectrum of compound *cis*-**3ae**

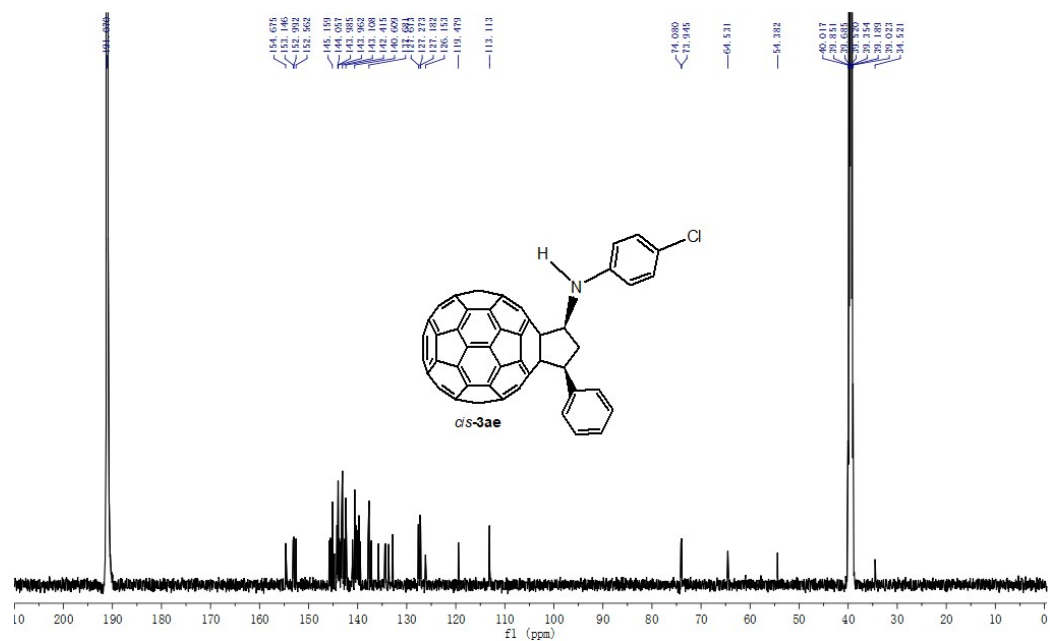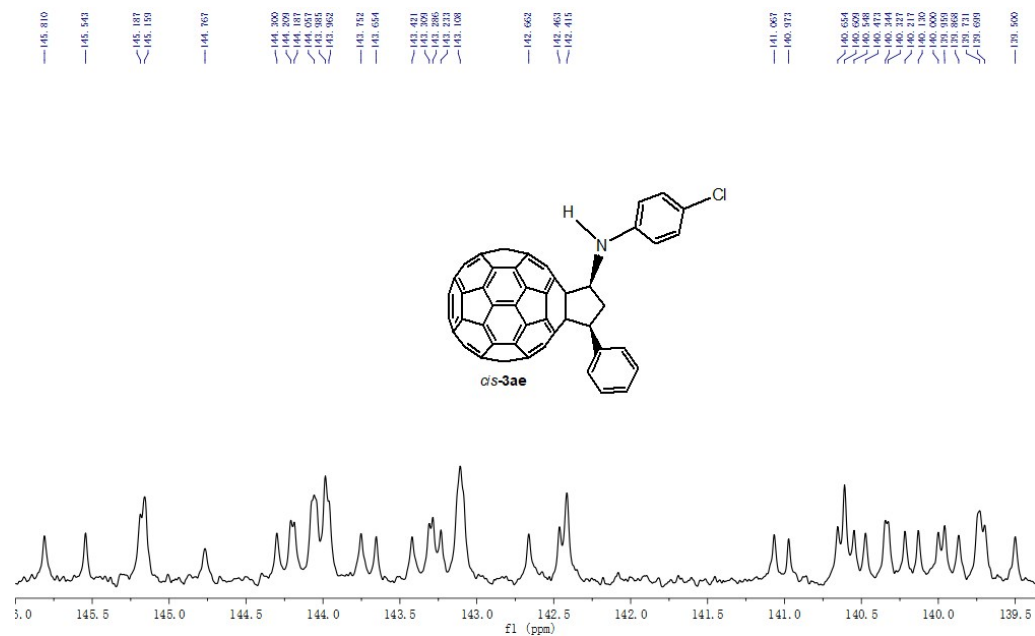

$^1\text{H}$  NMR (500 MHz,  $\text{CS}_2/\text{DMSO-}d_6$ ) spectrum of compound *trans*-**3af**

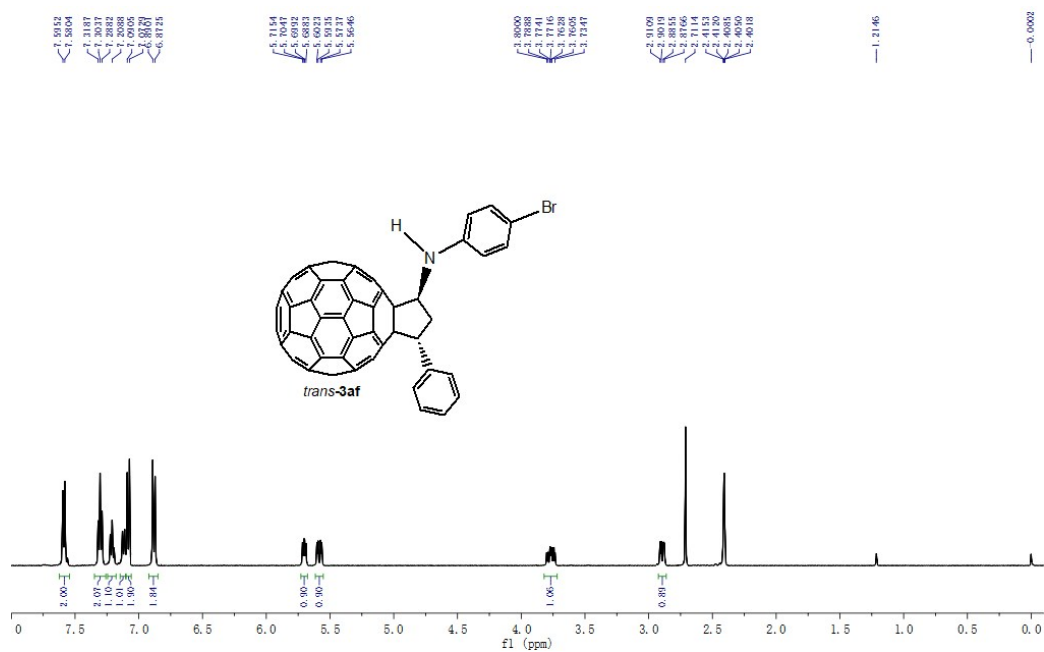

$^{13}\text{C}$  NMR (125 MHz,  $\text{CS}_2/\text{DMSO-}d_6$ ) spectrum of compound *trans*-**3af**

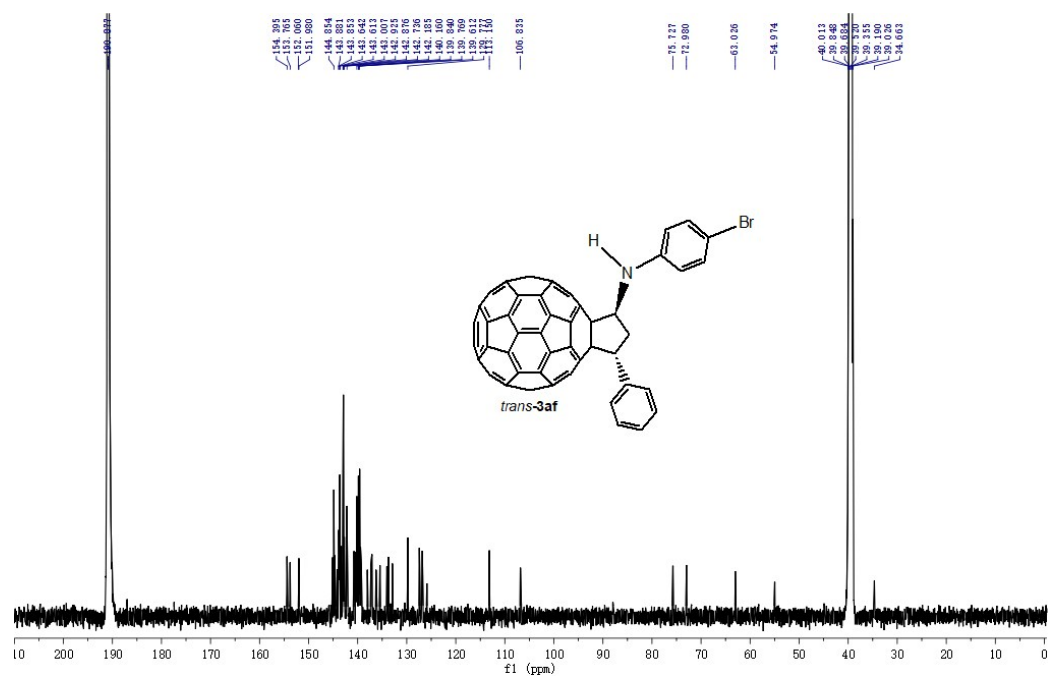

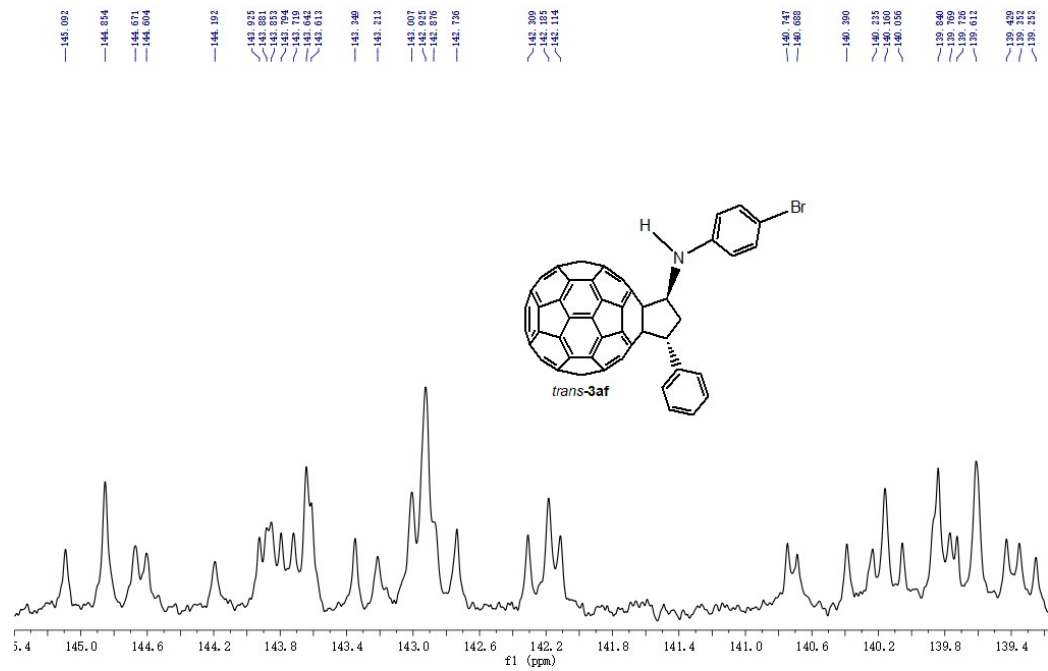

$^1\text{H}$  NMR (500 MHz,  $\text{CS}_2/\text{DMSO-}d_6$ ) spectrum of compound *cis*-**3af**

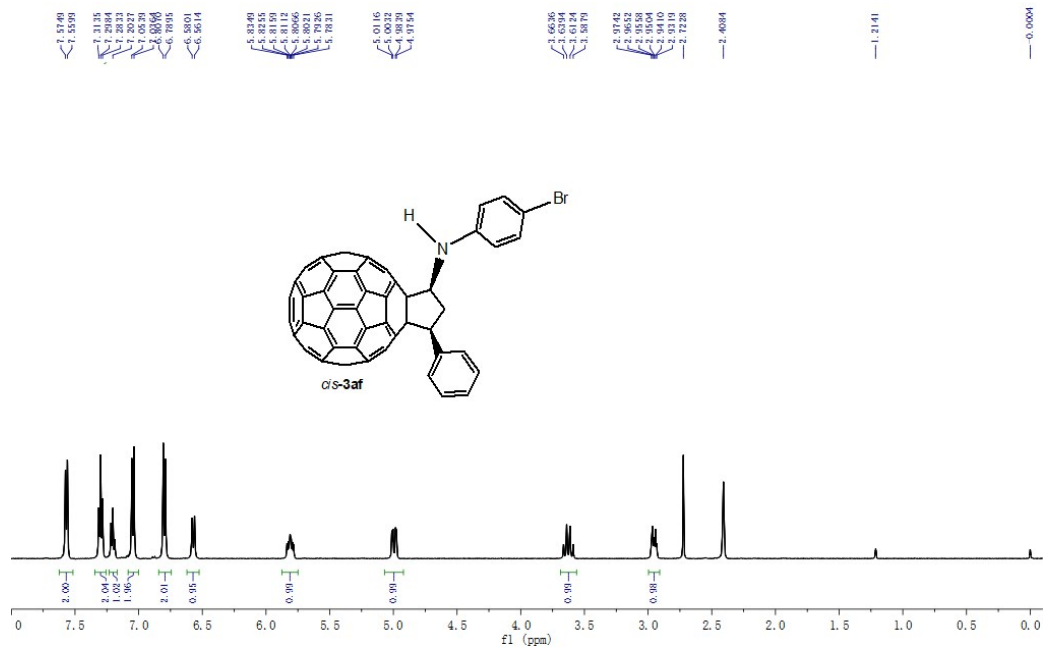

$^{13}\text{C}$  NMR (125 MHz,  $\text{CS}_2/\text{DMSO-}d_6$ ) spectrum of compound *cis-3af*

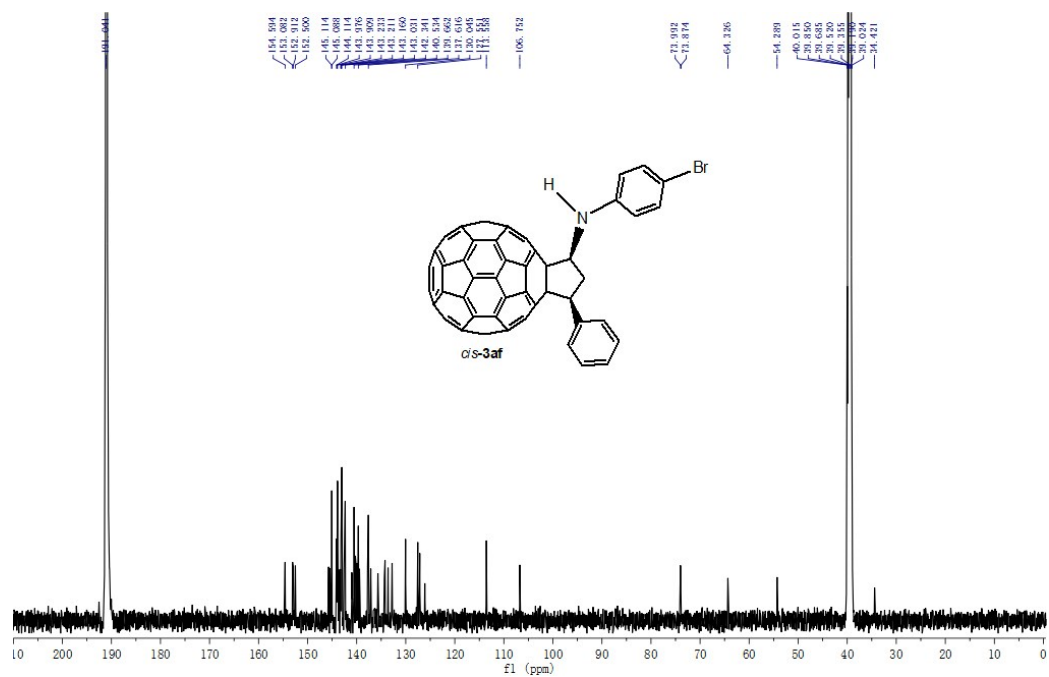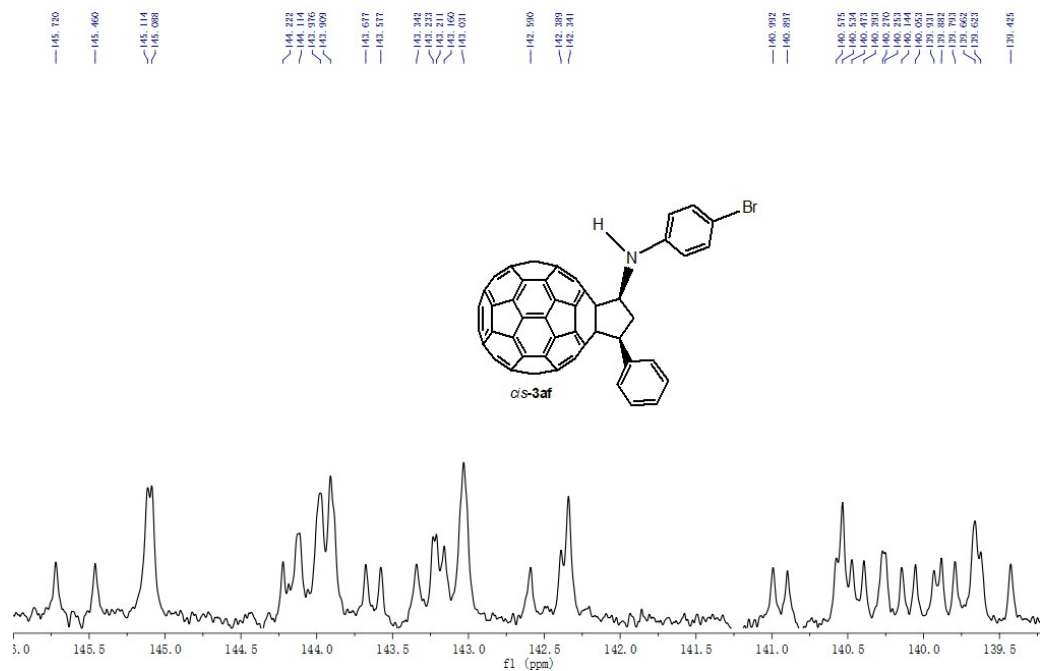

$^1\text{H}$  NMR (500 MHz,  $\text{CS}_2/\text{DMSO-}d_6$ ) spectrum of compound *trans*-**3ba**

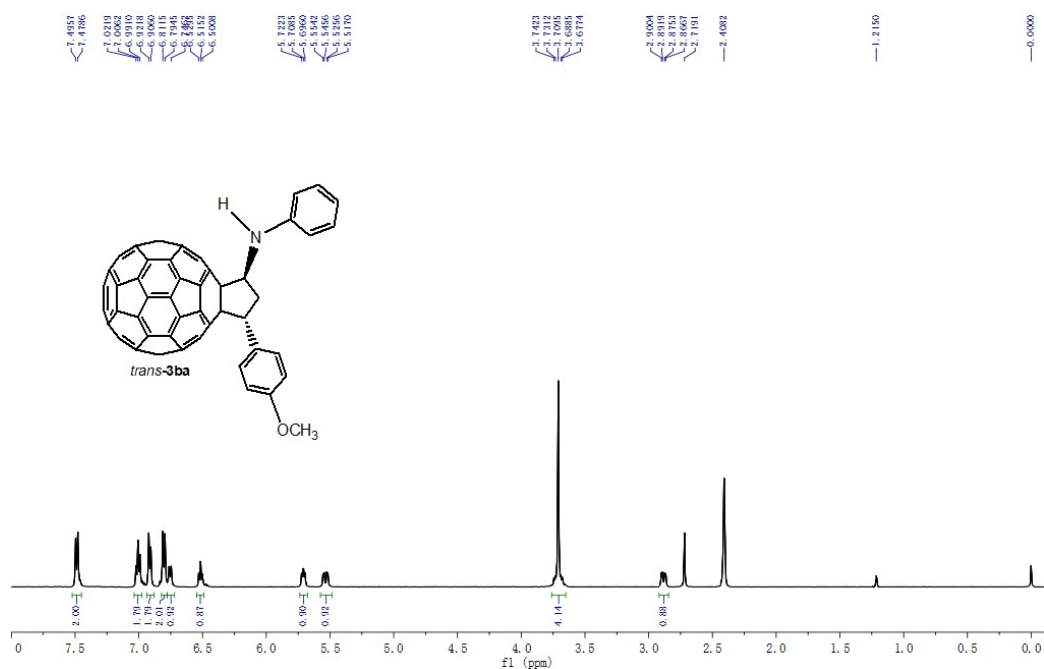

$^{13}\text{C}$  NMR (125 MHz,  $\text{CS}_2/\text{DMSO-}d_6$ ) spectrum of compound *trans*-**3ba**

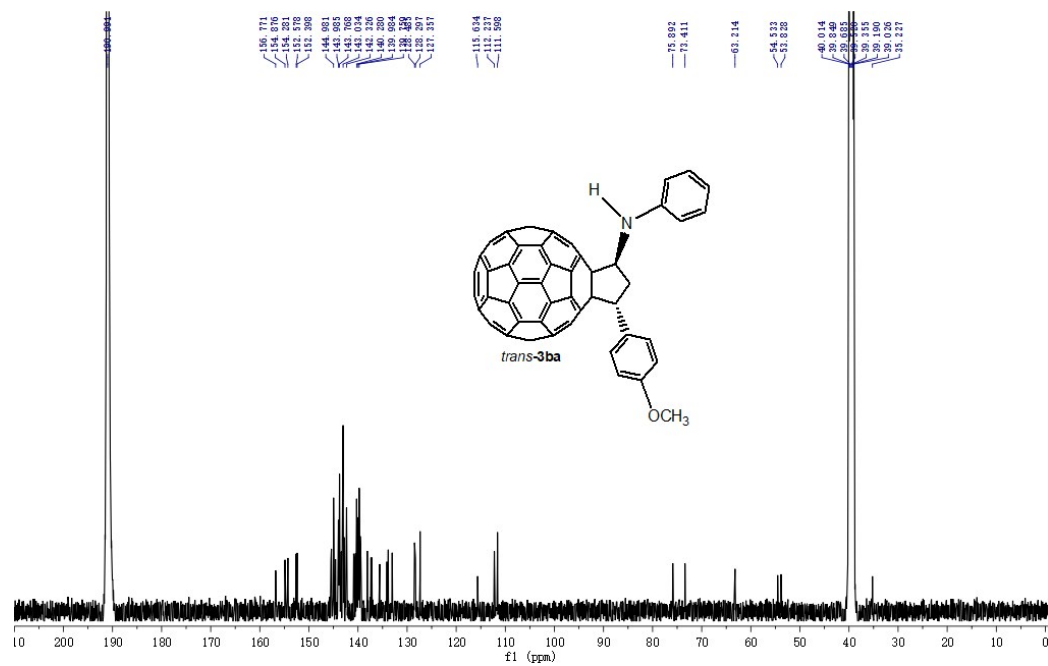

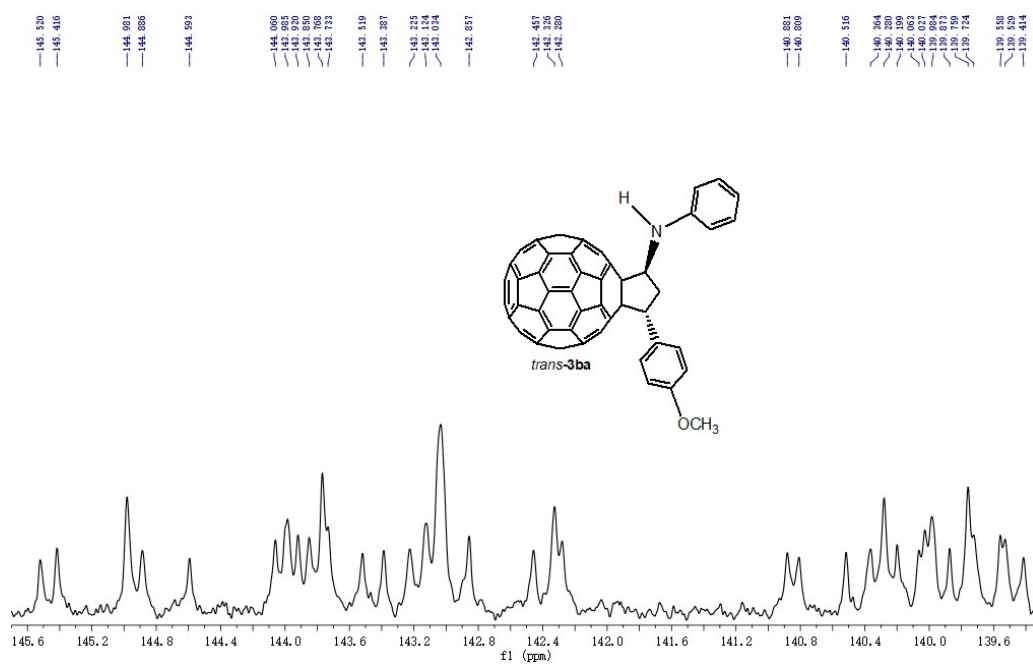

<sup>1</sup>H NMR (500 MHz, CS<sub>2</sub>/DMSO-*d*<sub>6</sub>) spectrum of compound *cis*-3ba

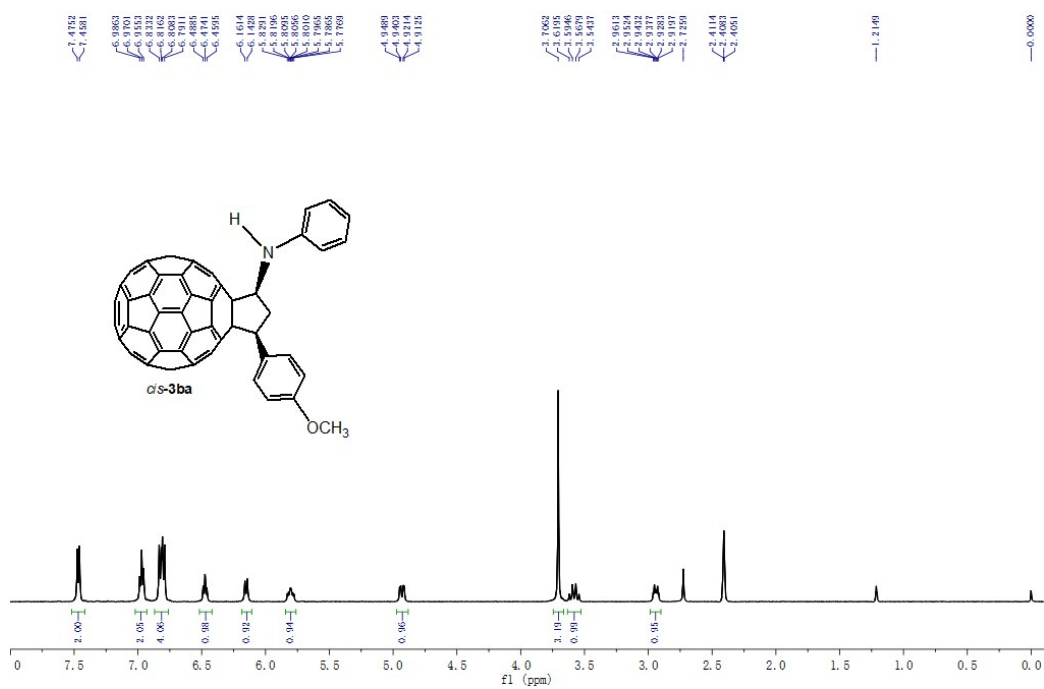

$^{13}\text{C}$  NMR (125 MHz,  $\text{CS}_2/\text{DMSO-}d_6$ ) spectrum of compound *cis*-3ba

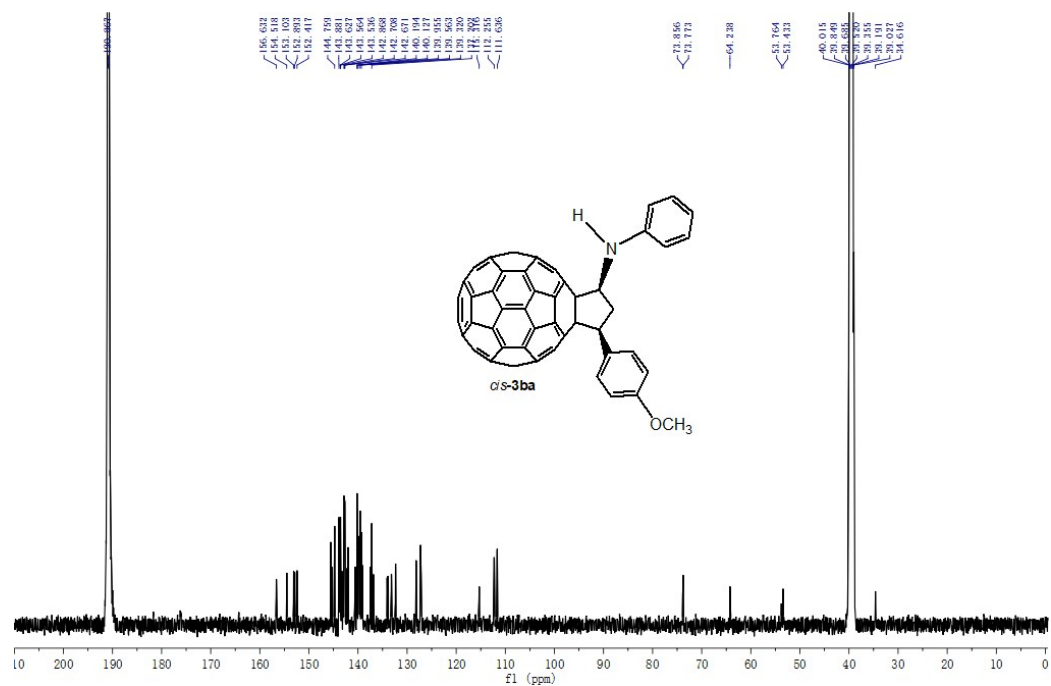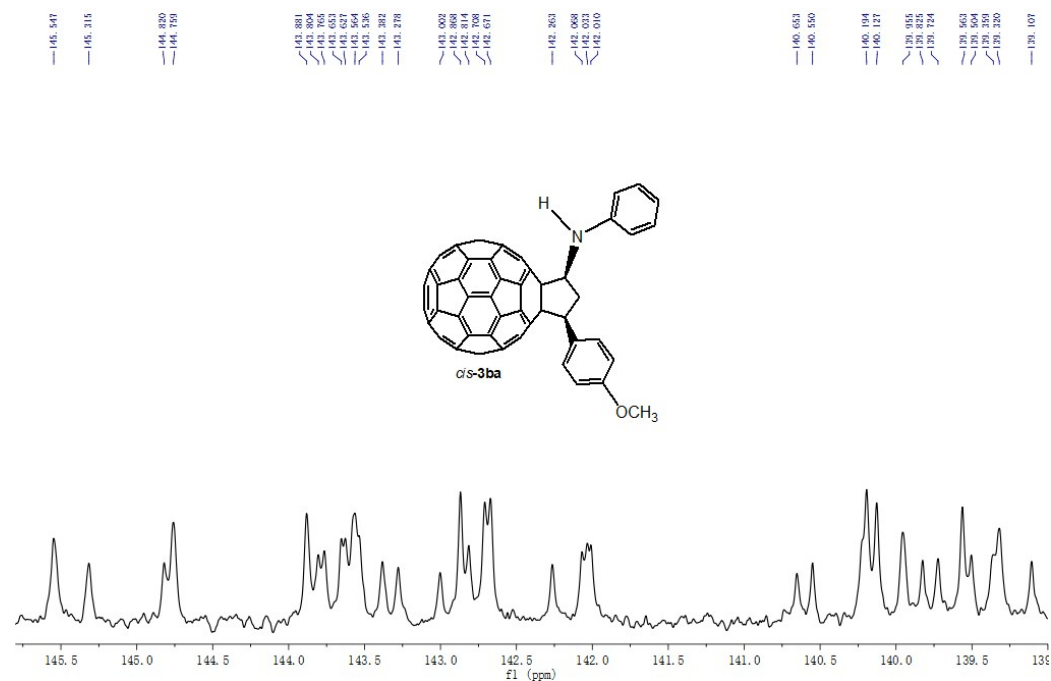



$^1\text{H}$  NMR (500 MHz,  $\text{CS}_2/\text{DMSO-}d_6$ ) spectrum of compound *trans-3ca*

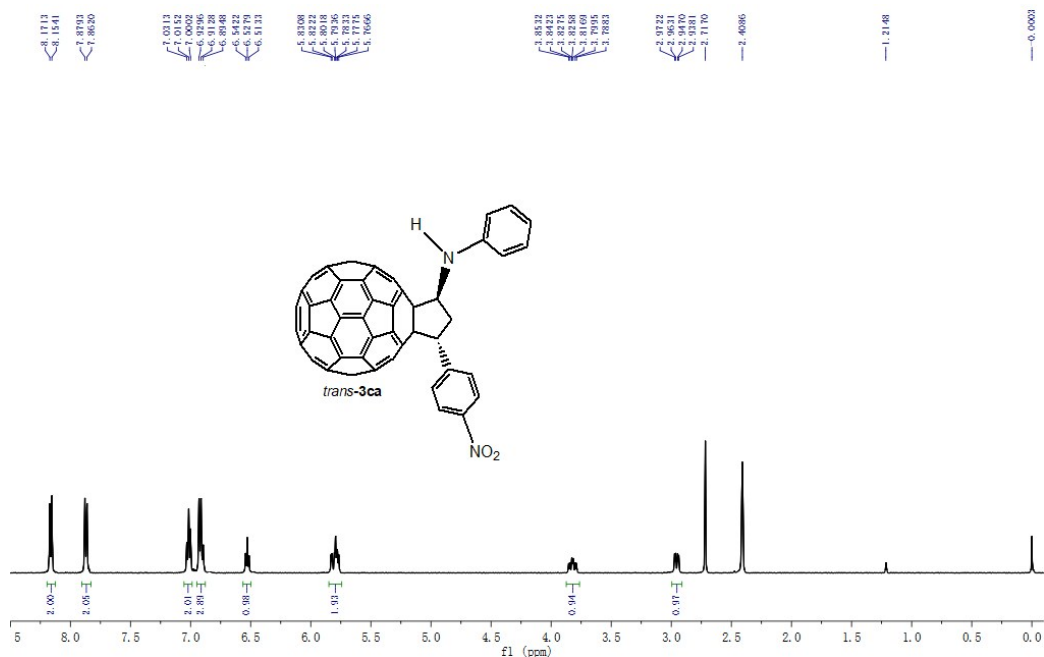

$^{13}\text{C}$  NMR (125 MHz,  $\text{CS}_2/\text{DMSO-}d_6$ ) spectrum of compound *trans-3ca*

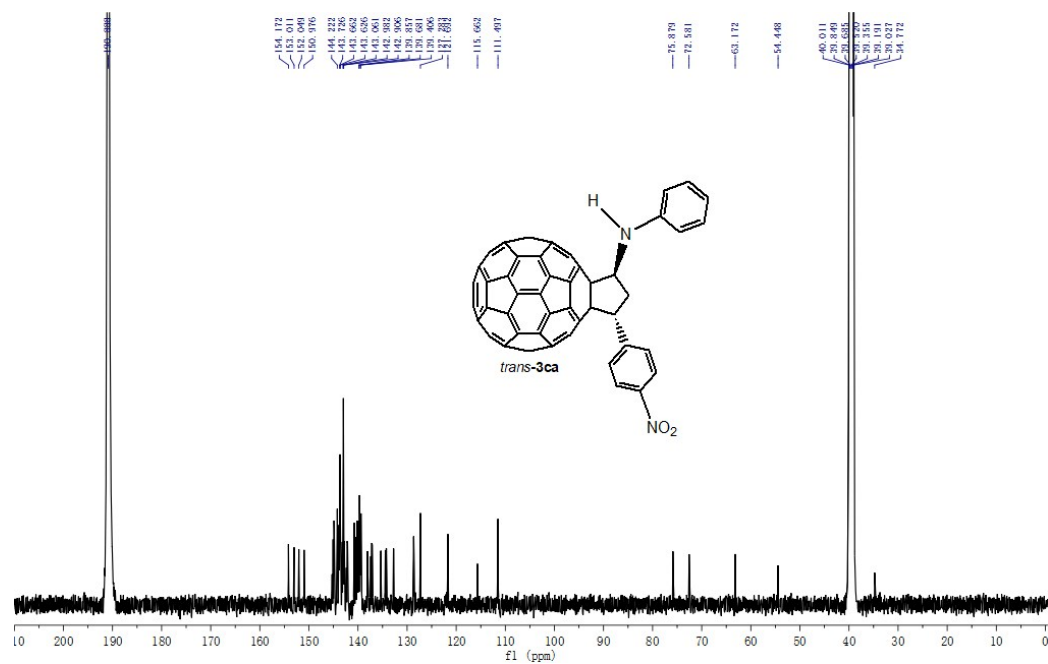

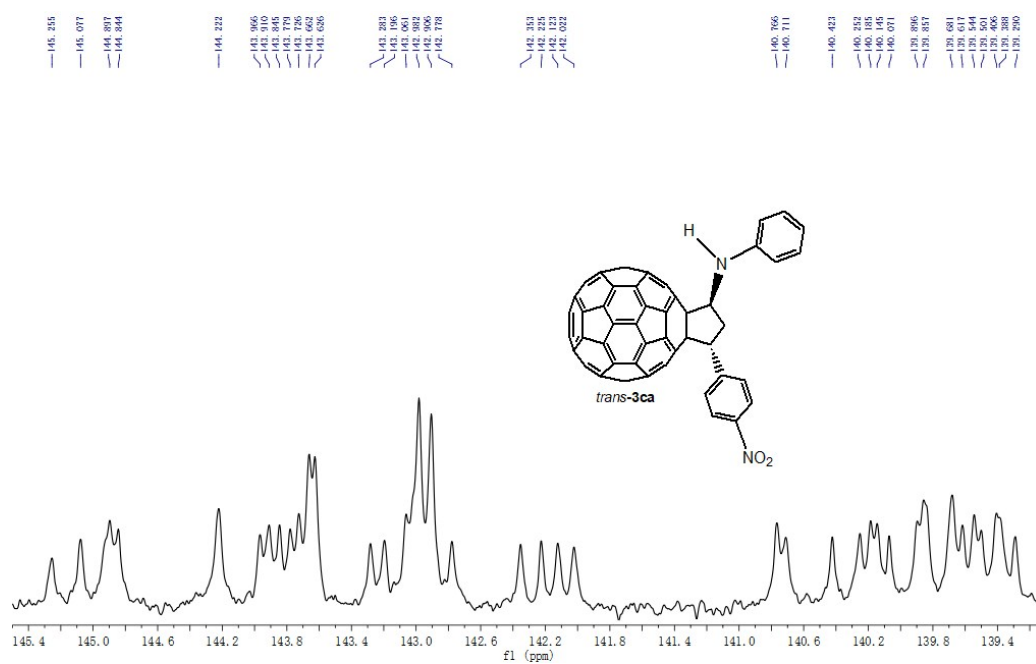

<sup>1</sup>H NMR (500 MHz, CS<sub>2</sub>/DMSO-*d*<sub>6</sub>) spectrum of compound *cis-3ca*

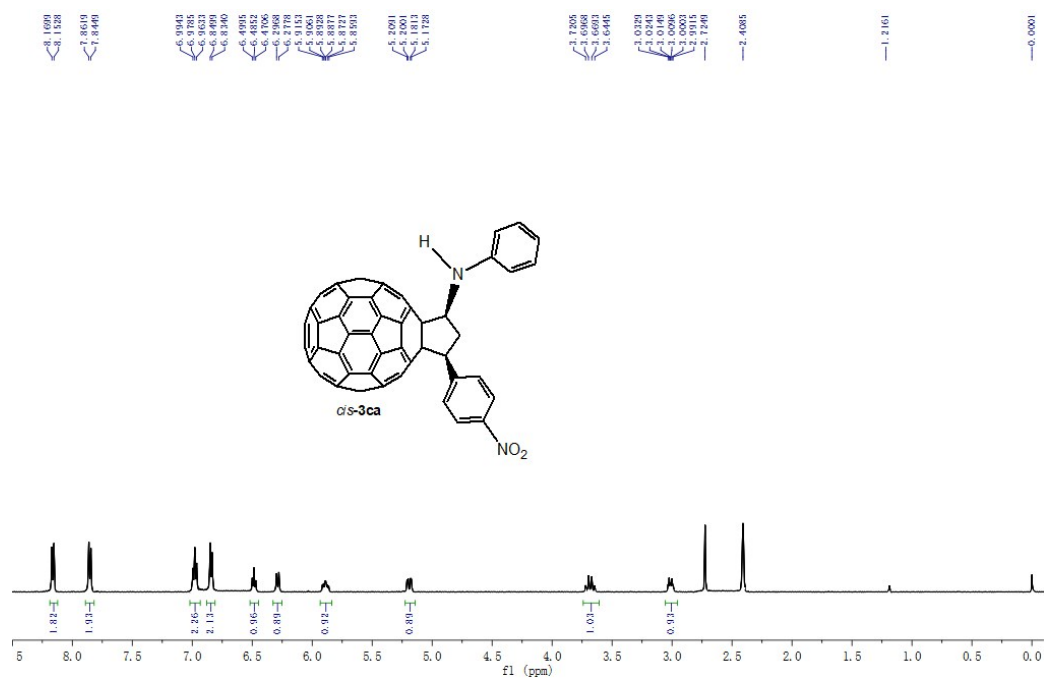

<sup>13</sup>C NMR (125 MHz, CS<sub>2</sub>/DMSO-*d*<sub>6</sub>) spectrum of compound *cis*-3ca

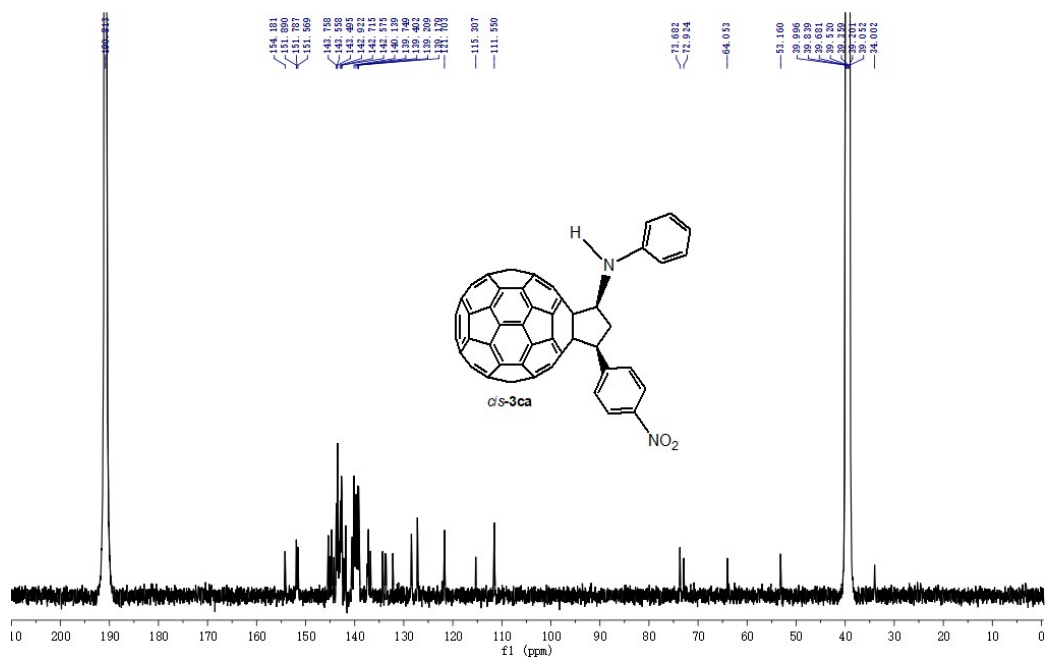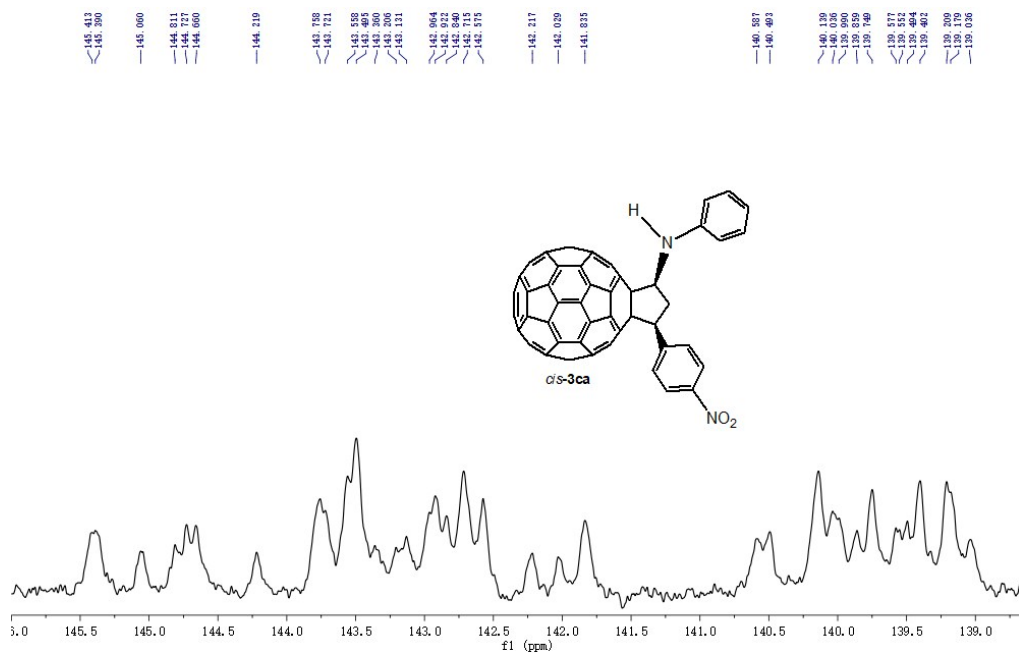

$^1\text{H}$  NMR (500 MHz,  $\text{CS}_2/\text{DMSO-}d_6$ ) spectrum of compound *trans/cis-3da*

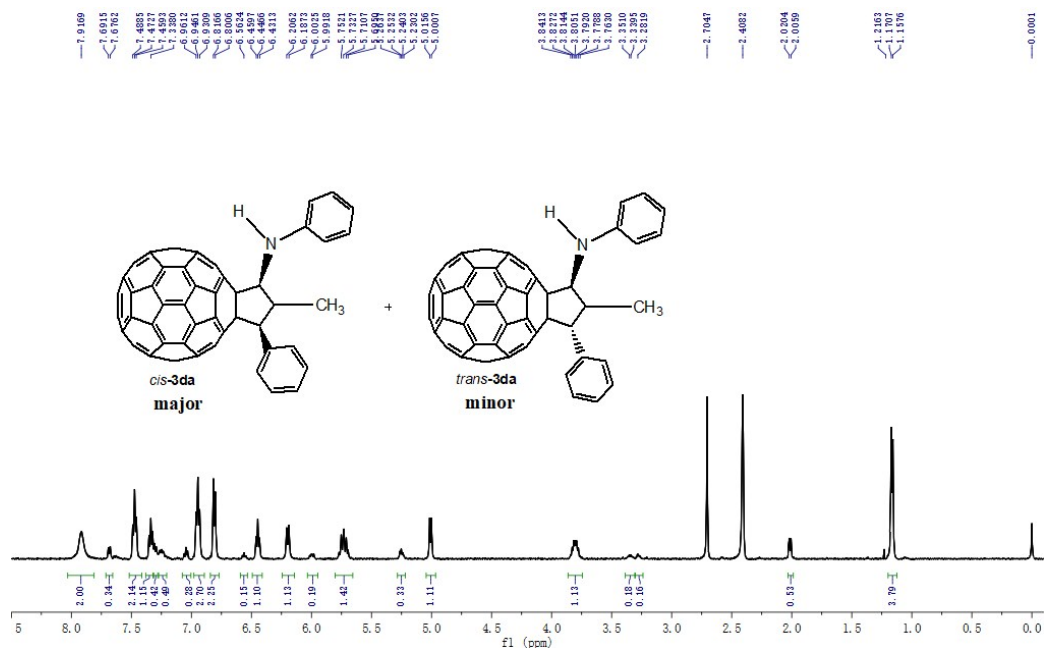

$^{13}\text{C}$  NMR (125 MHz,  $\text{CS}_2/\text{DMSO-}d_6$ ) spectrum of compound *trans/cis-3da*

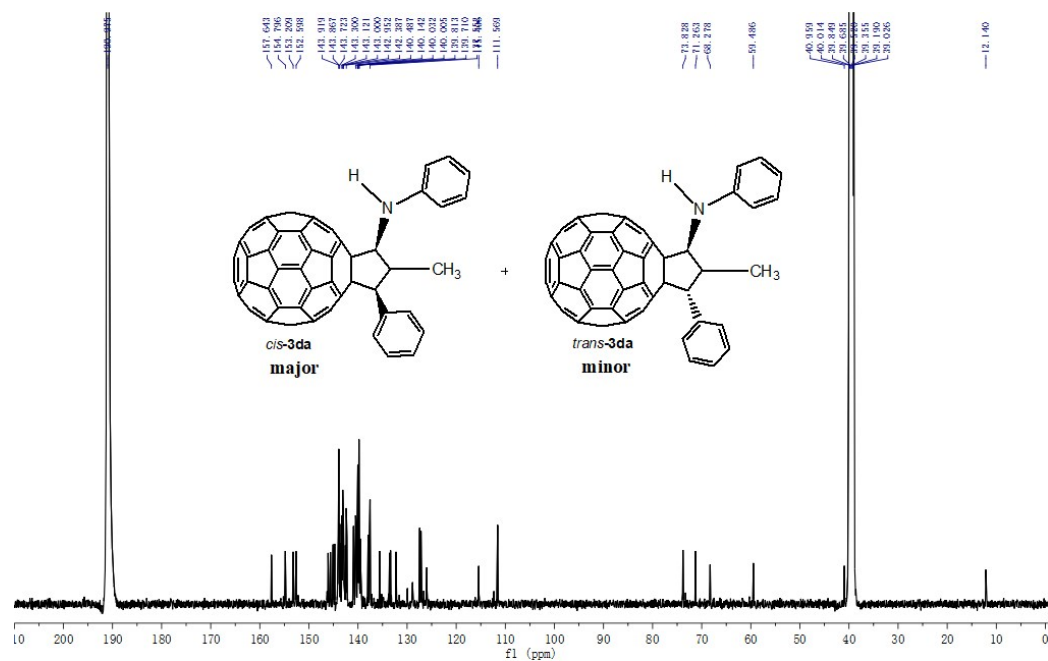

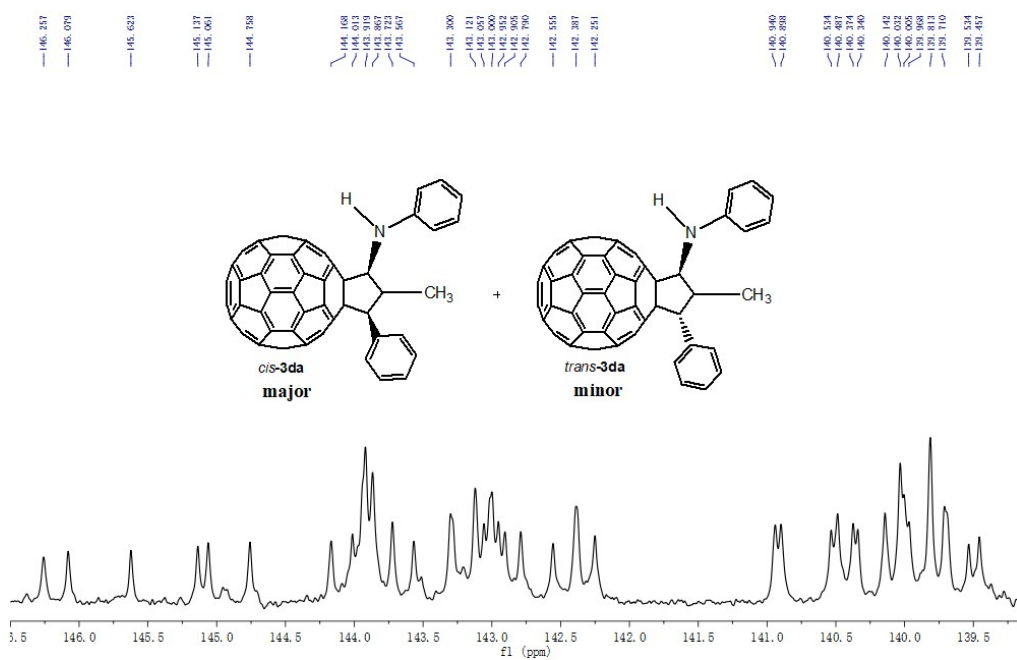

<sup>1</sup>H NMR (500 MHz, CS<sub>2</sub>/DMSO-*d*<sub>6</sub>) spectrum of compound *cis-5aa*

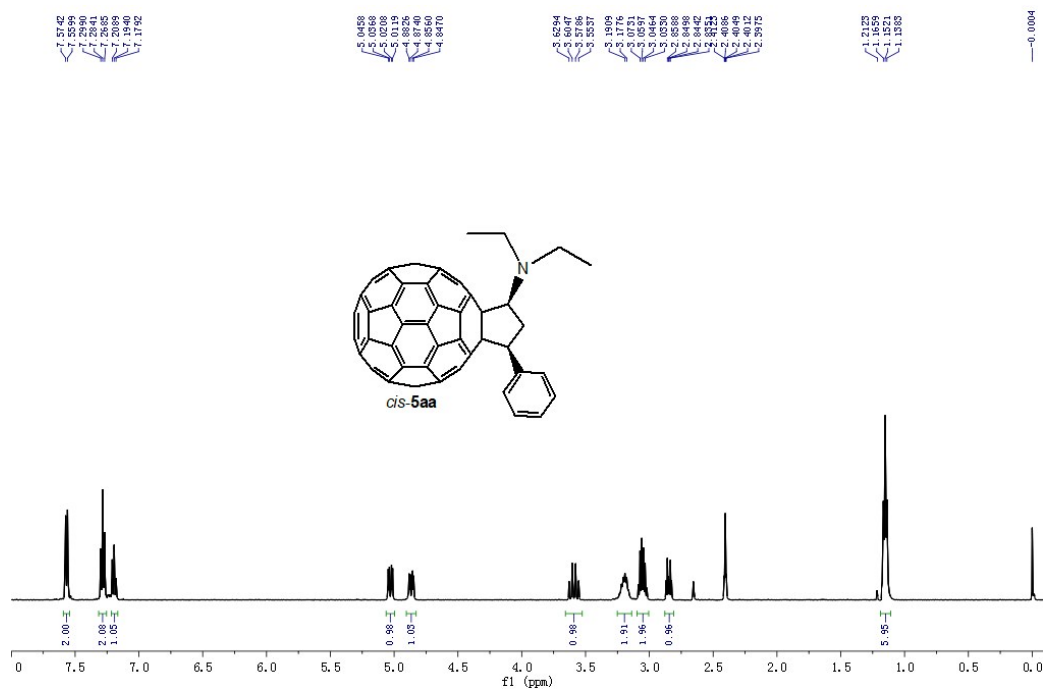

$^{13}\text{C}$  NMR (125 MHz,  $\text{CS}_2/\text{DMSO-}d_6$ ) spectrum of compound *cis-5aa*

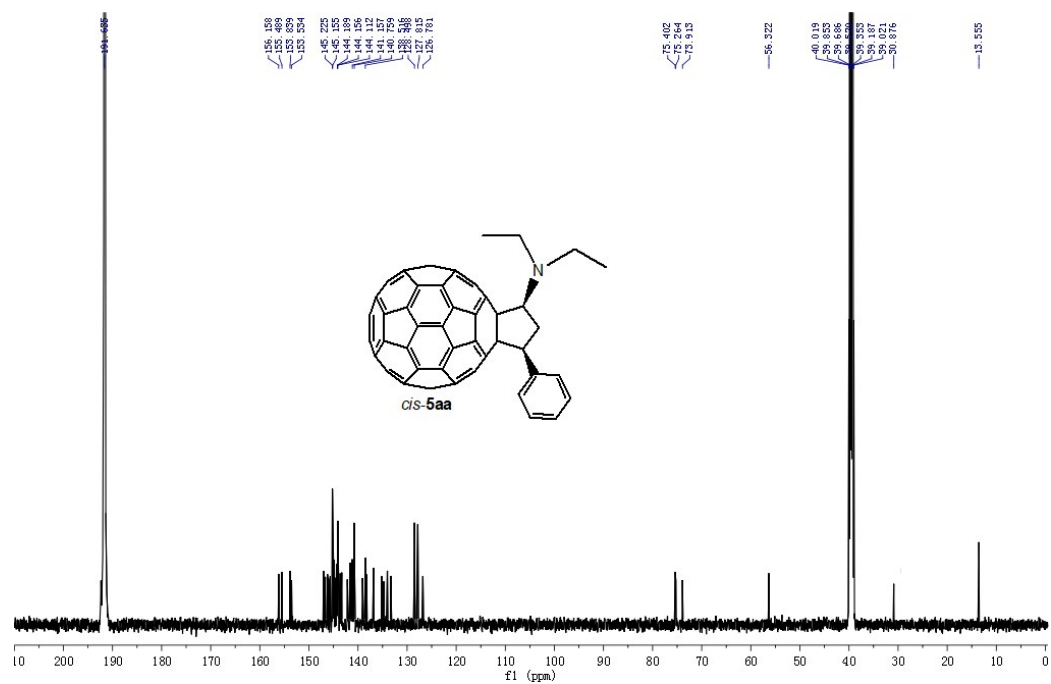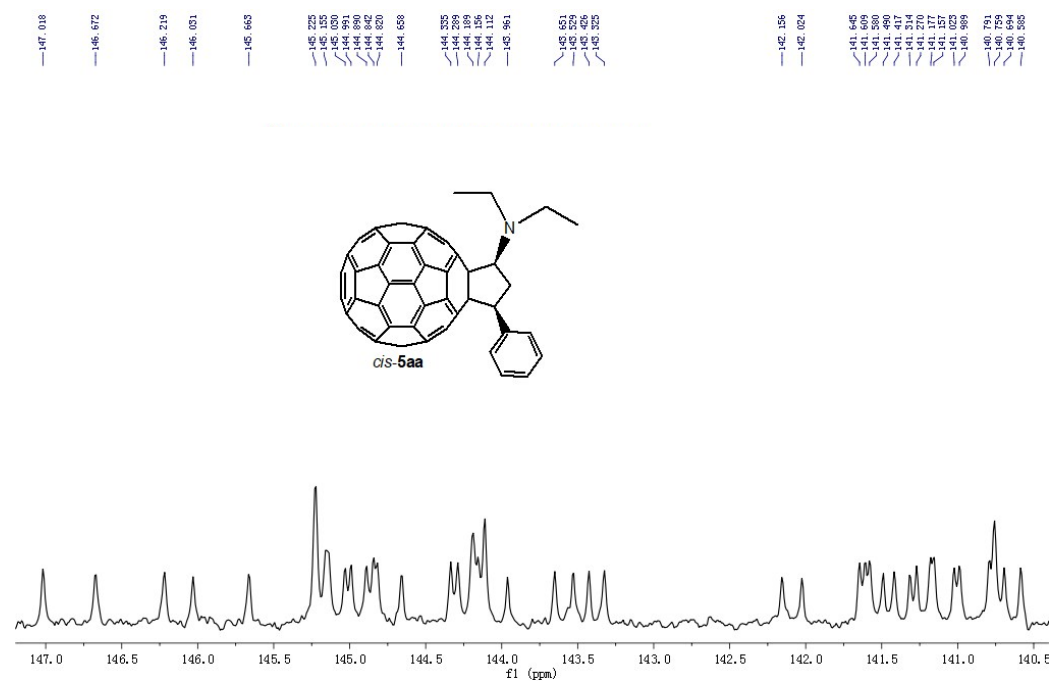

<sup>1</sup>H NMR (500 MHz, CS<sub>2</sub>/DMSO-*d*<sub>6</sub>) spectrum of compound *cis*-5ab

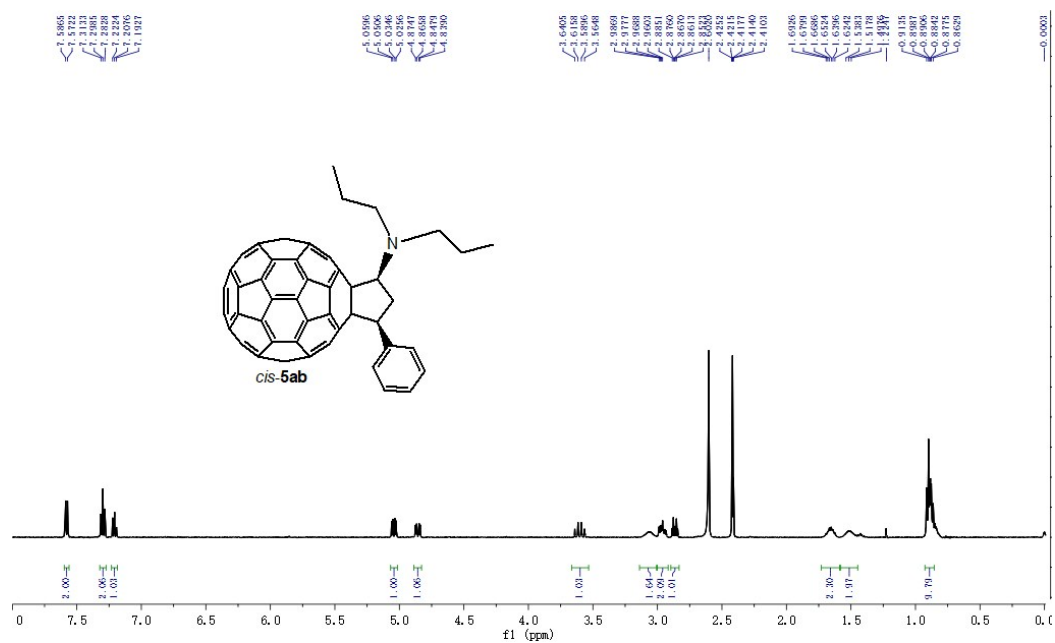

<sup>13</sup>C NMR (125 MHz, CS<sub>2</sub>/DMSO-*d*<sub>6</sub>) spectrum of compound *cis*-5ab

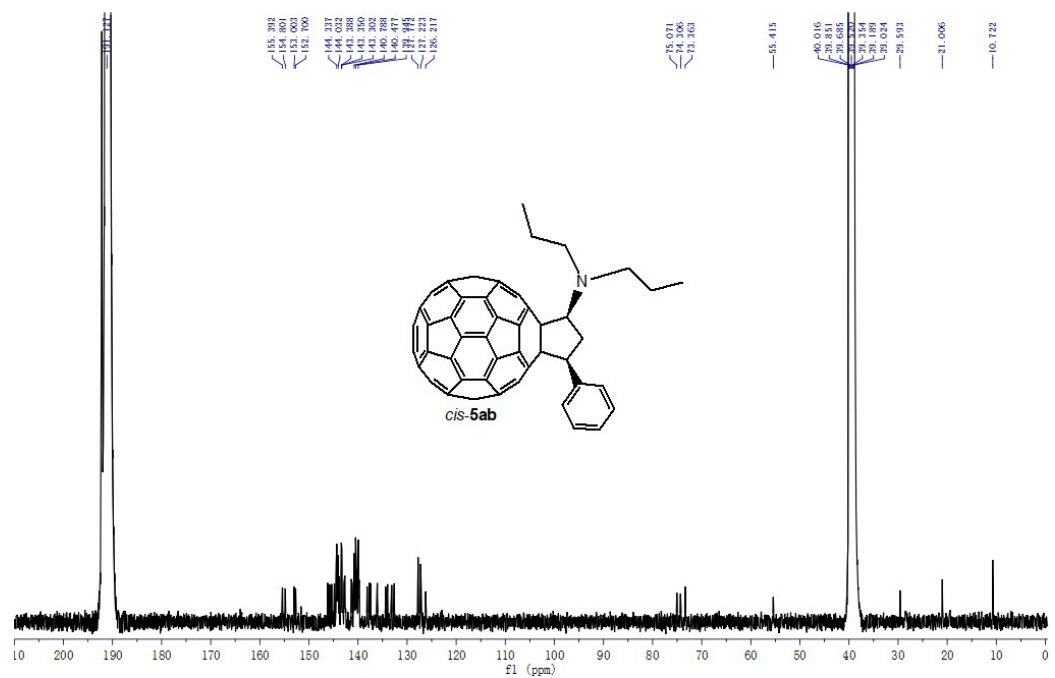

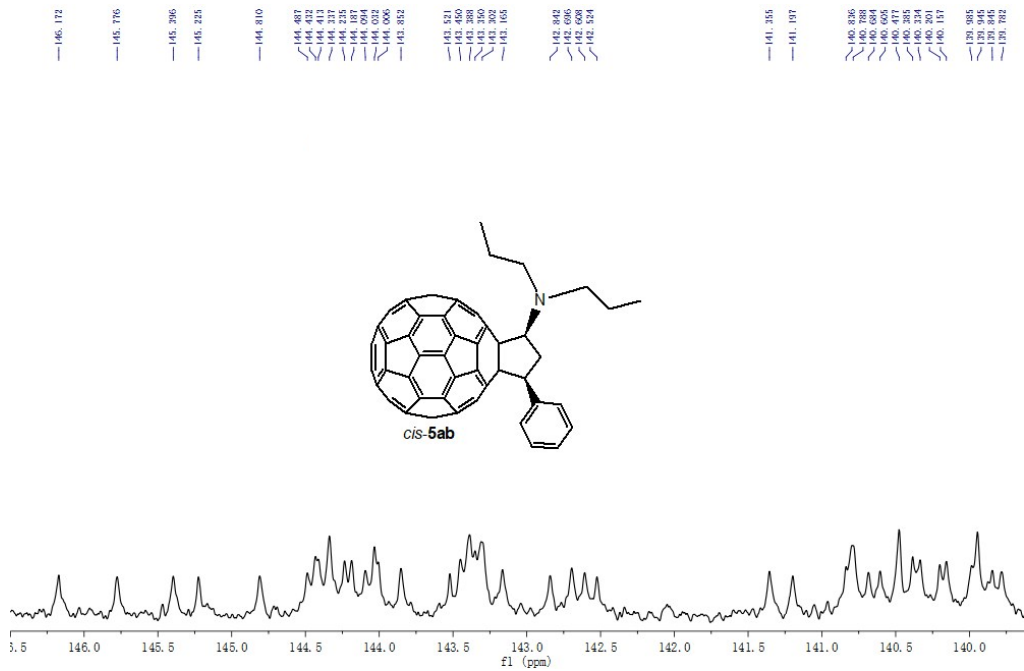

<sup>1</sup>H NMR (500 MHz, CS<sub>2</sub>/DMSO-*d*<sub>6</sub>) spectrum of compound **cis-5ac**

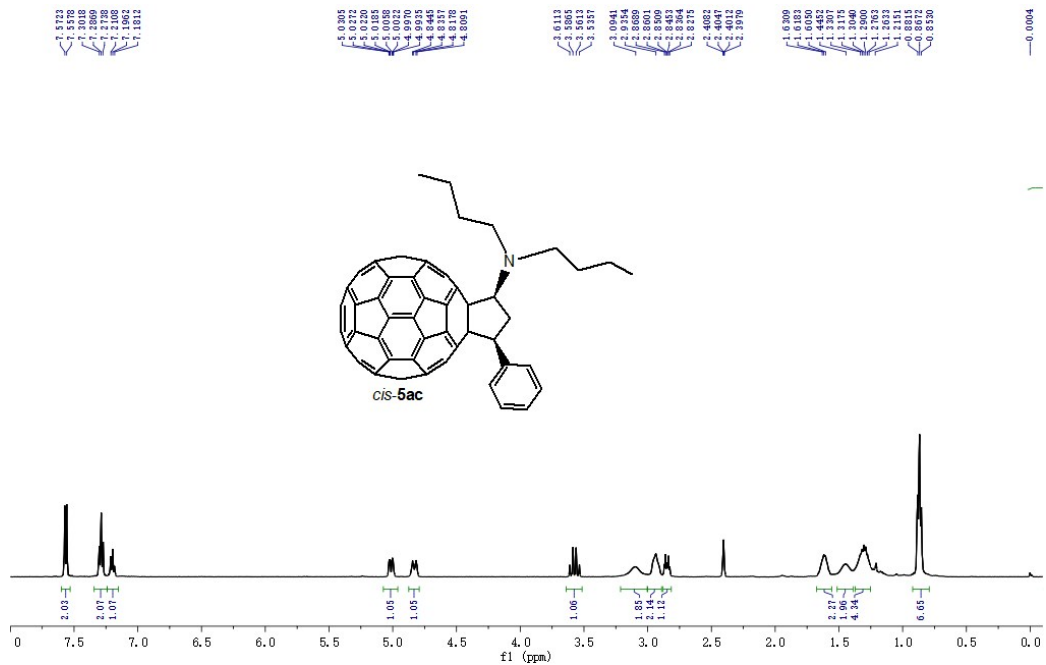



$^{13}\text{C}$  NMR (125 MHz,  $\text{CS}_2/\text{DMSO}-d_6$ ) spectrum of compound *cis-5ac*

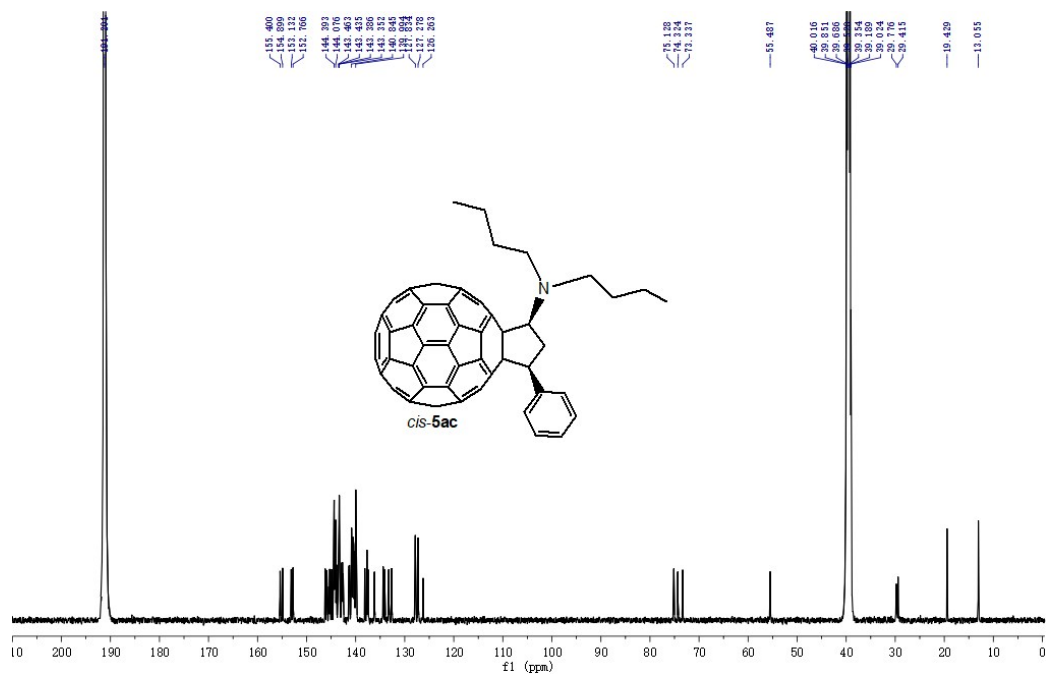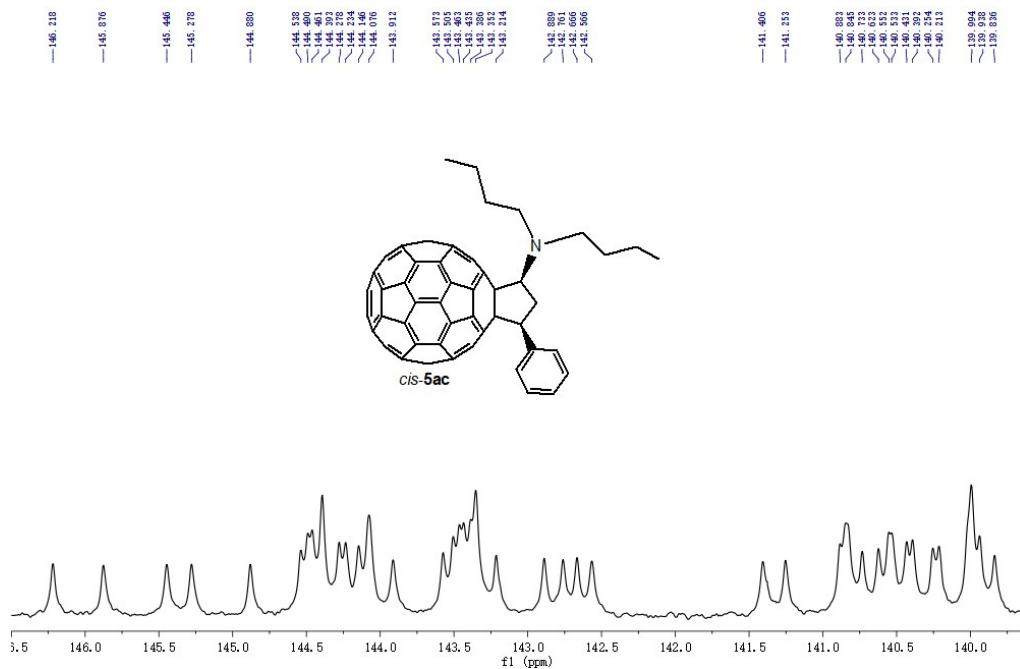



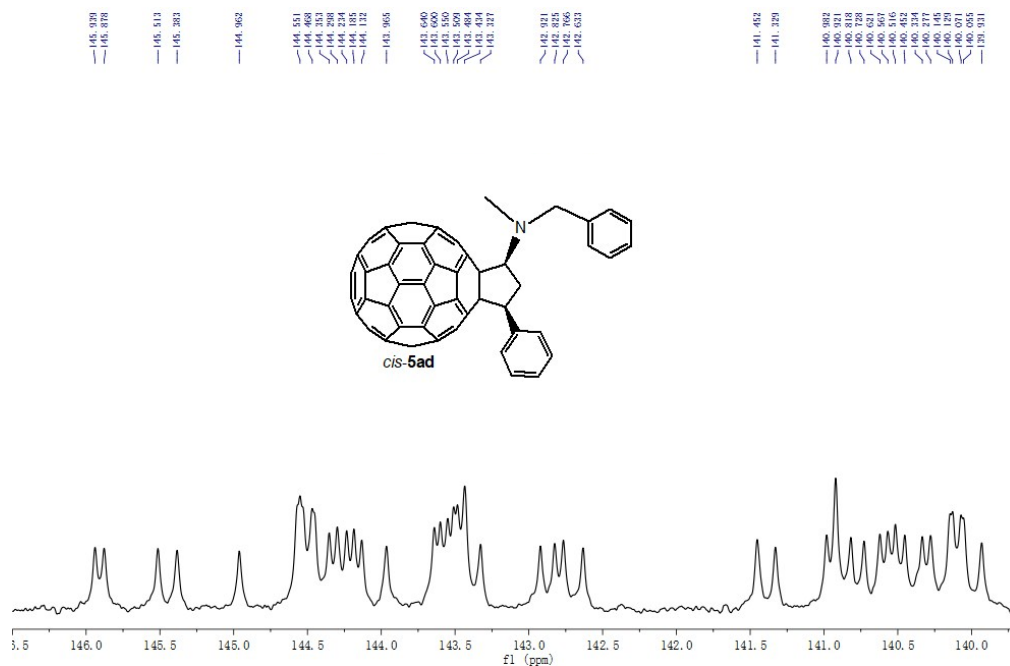

<sup>1</sup>H NMR (500 MHz, CS<sub>2</sub>/DMSO-*d*<sub>6</sub>) spectrum of compound *cis-5ae*

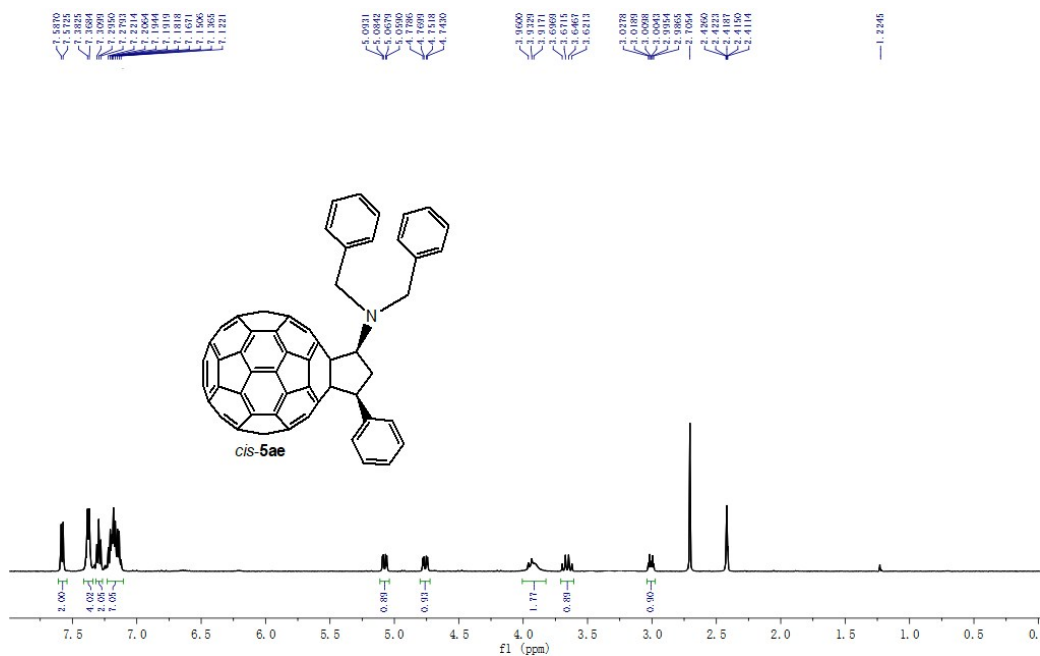

$^{13}\text{C}$  NMR (125 MHz,  $\text{CS}_2/\text{DMSO-}d_6$ ) spectrum of compound *cis-5ae*

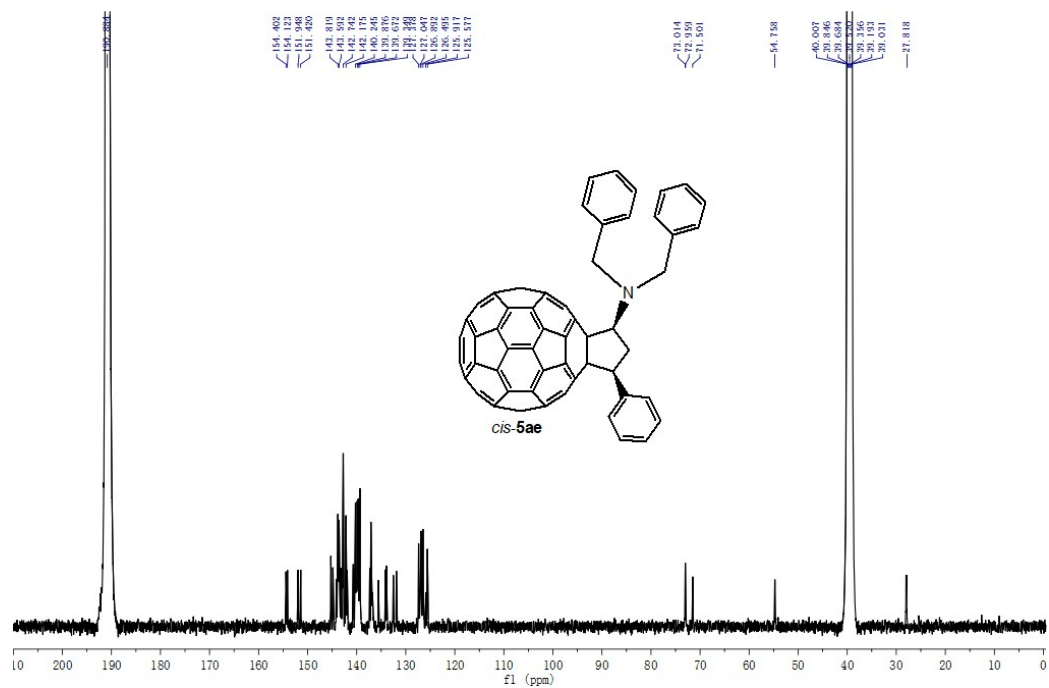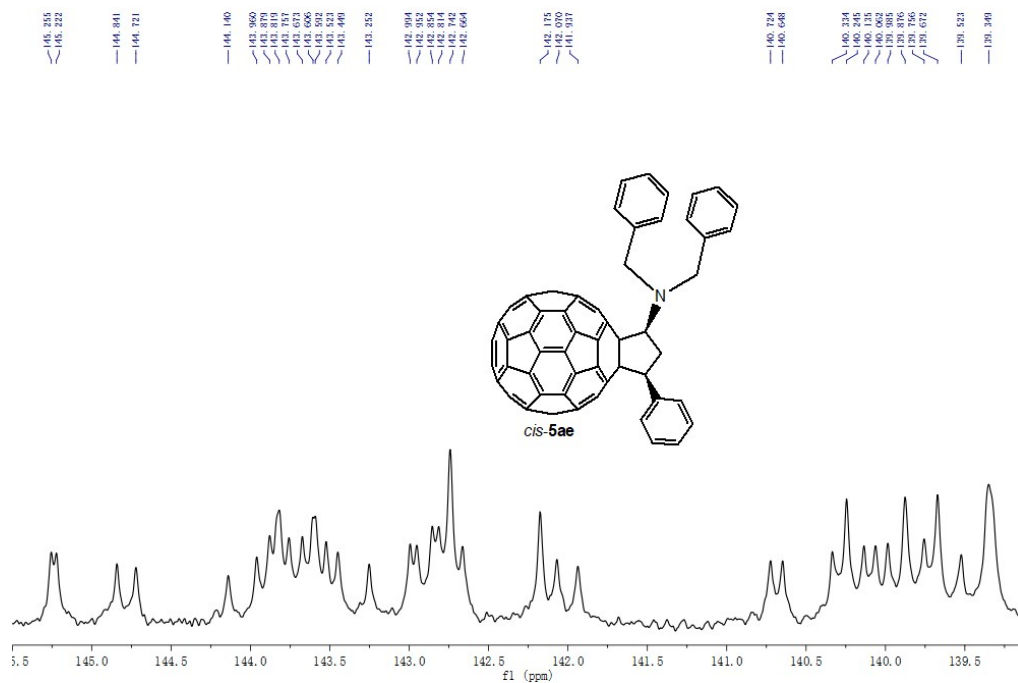

$^1\text{H}$  NMR (500 MHz,  $\text{CS}_2/\text{DMSO}-d_6$ ) spectrum of compound *cis-5af*

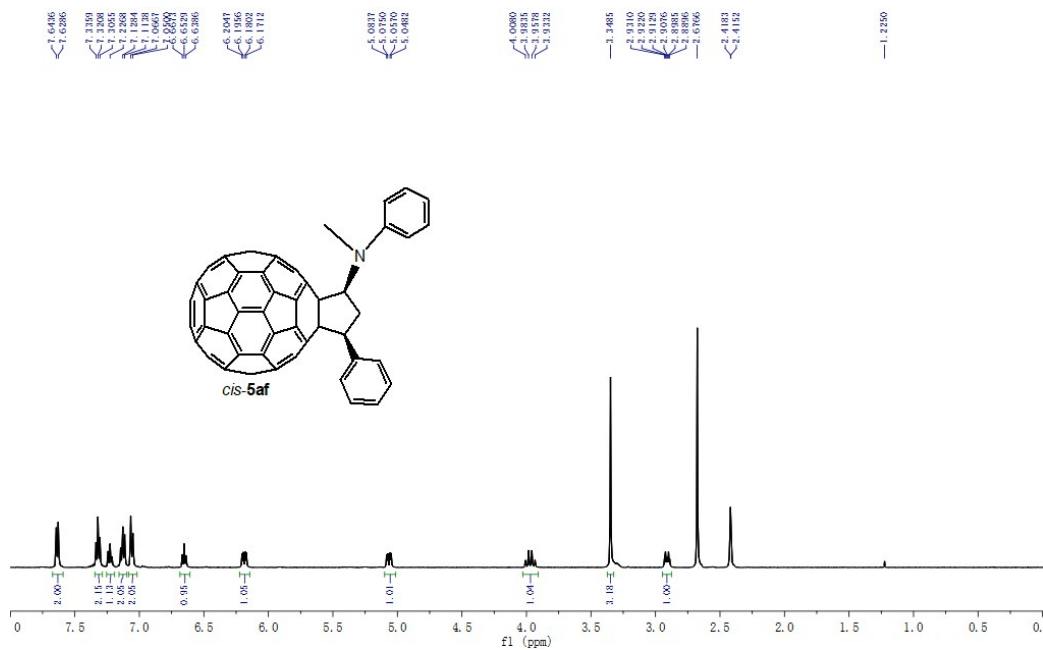

$^{13}\text{C}$  NMR (125 MHz,  $\text{CS}_2/\text{DMSO}-d_6$ ) spectrum of compound *cis-5af*

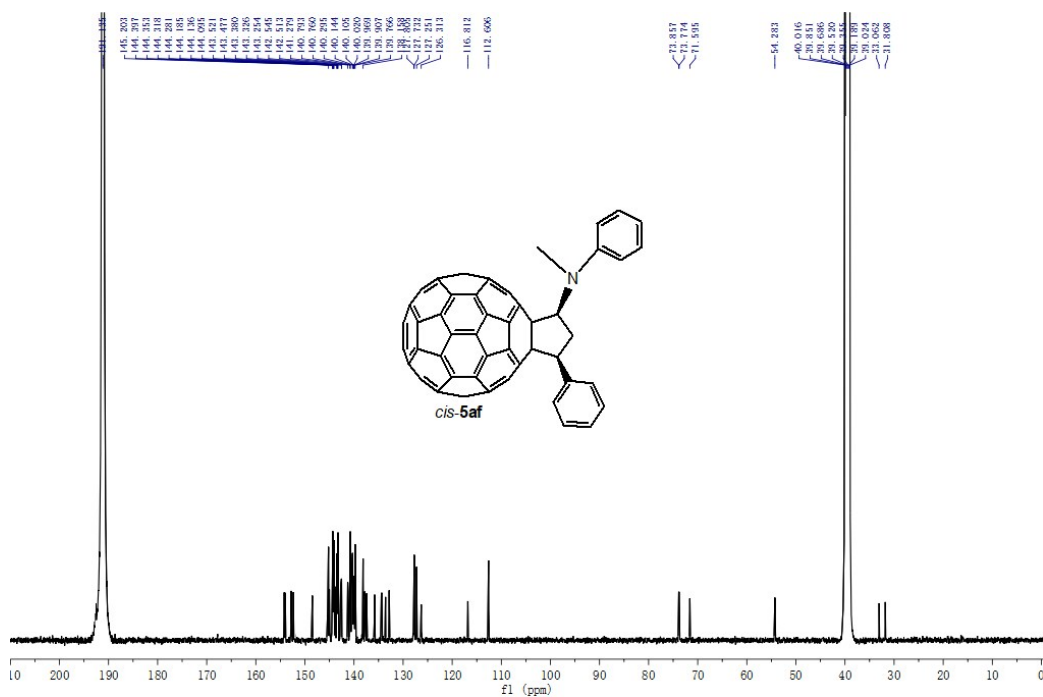

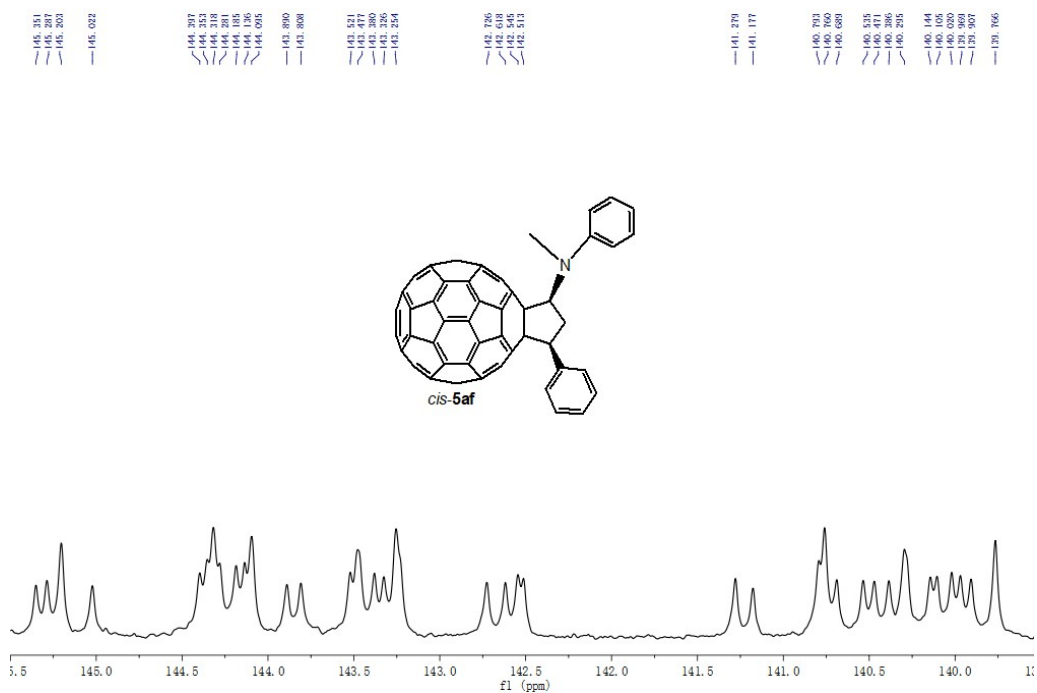

<sup>1</sup>H NMR (500 MHz, CS<sub>2</sub>/DMSO-*d*<sub>6</sub>) spectrum of compound *cis*-5ag

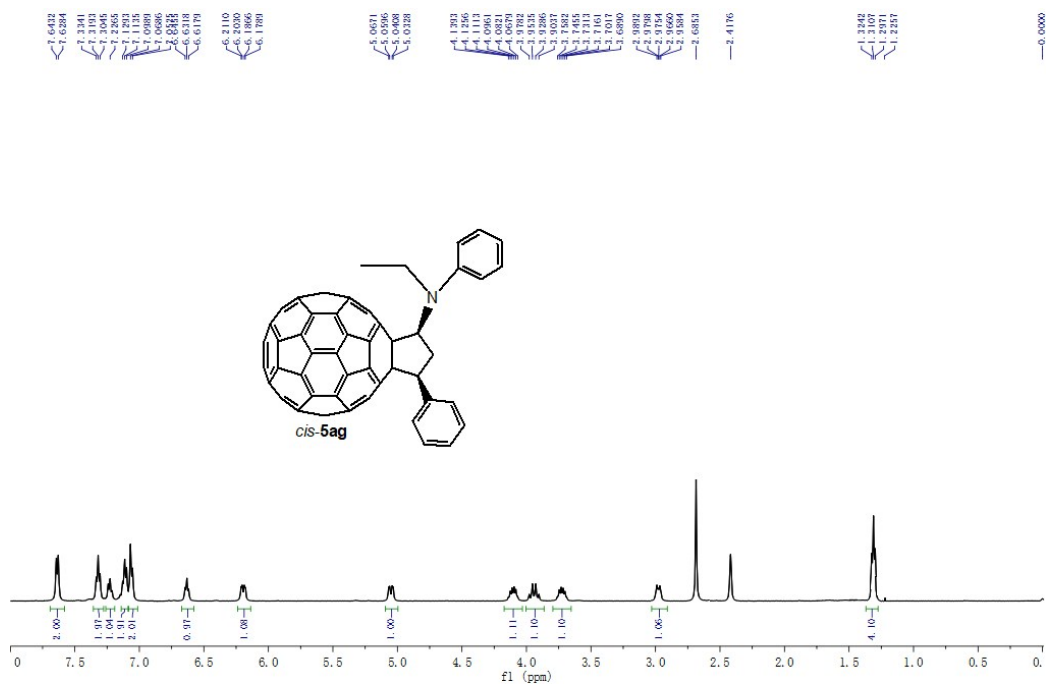

$^{13}\text{C}$  NMR (125 MHz,  $\text{CS}_2/\text{DMSO}-d_6$ ) spectrum of compound *cis-5ag*

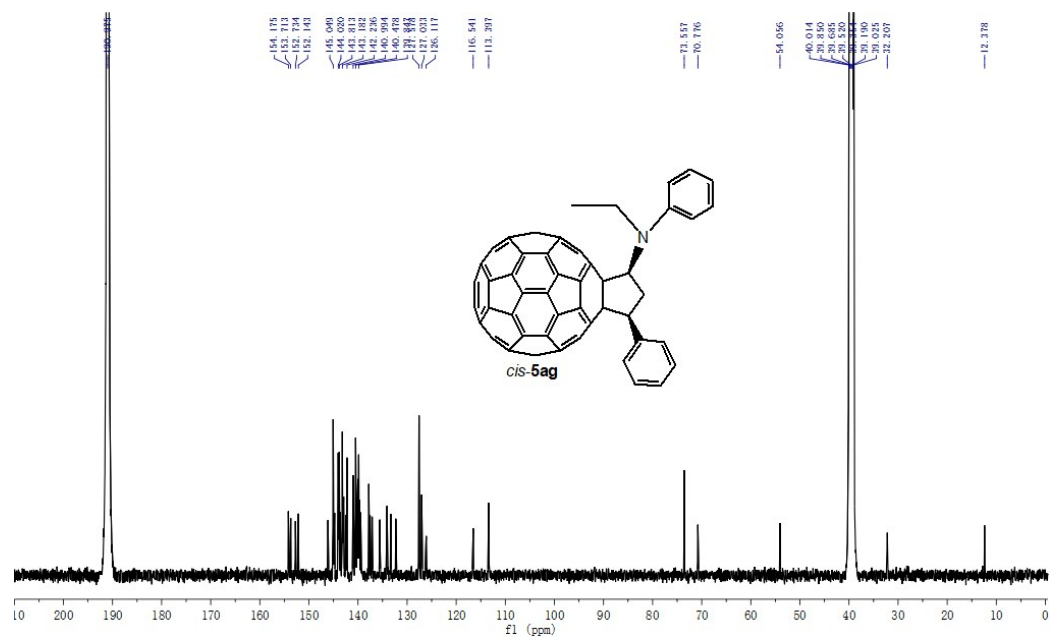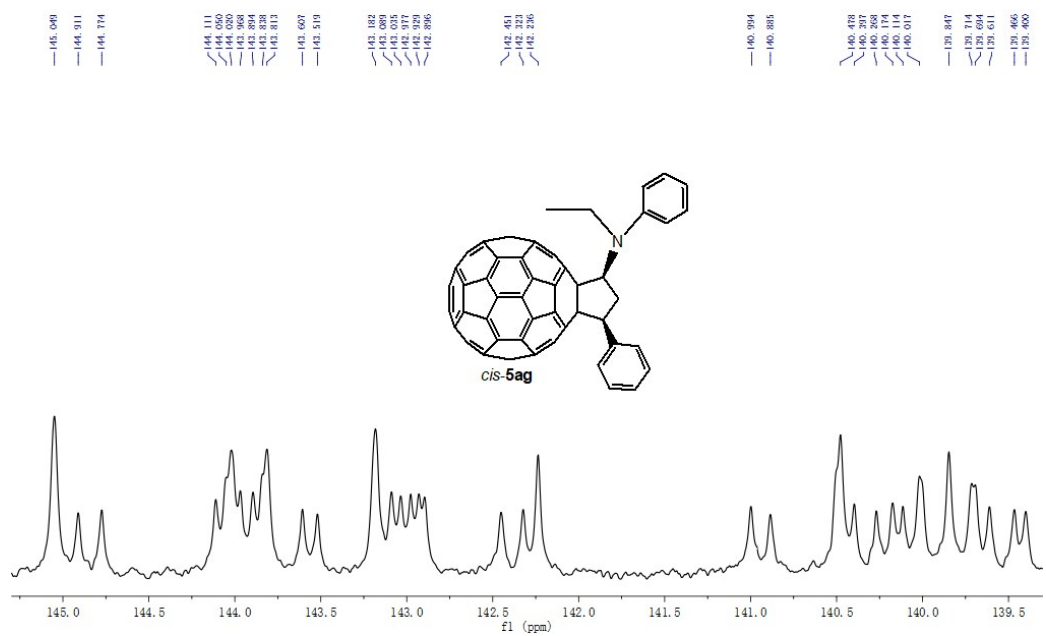

$^1\text{H}$  NMR (500 MHz,  $\text{CS}_2/\text{DMSO}-d_6$ ) spectrum of compound *cis*-5ba

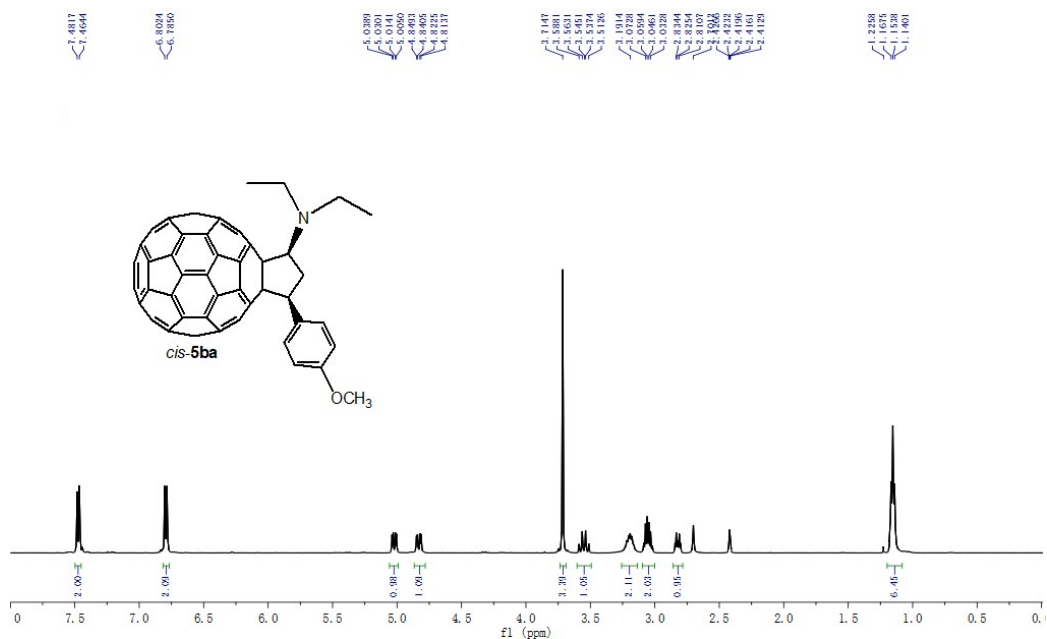

$^{13}\text{C}$  NMR (125 MHz,  $\text{CS}_2/\text{DMSO}-d_6$ ) spectrum of compound *cis*-5ba

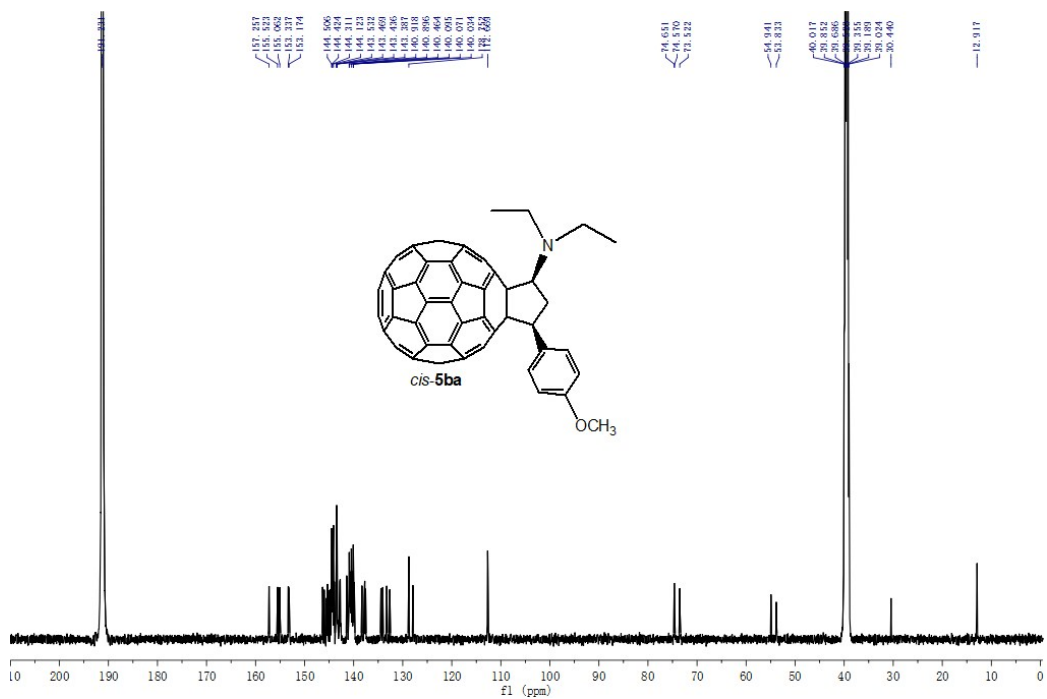



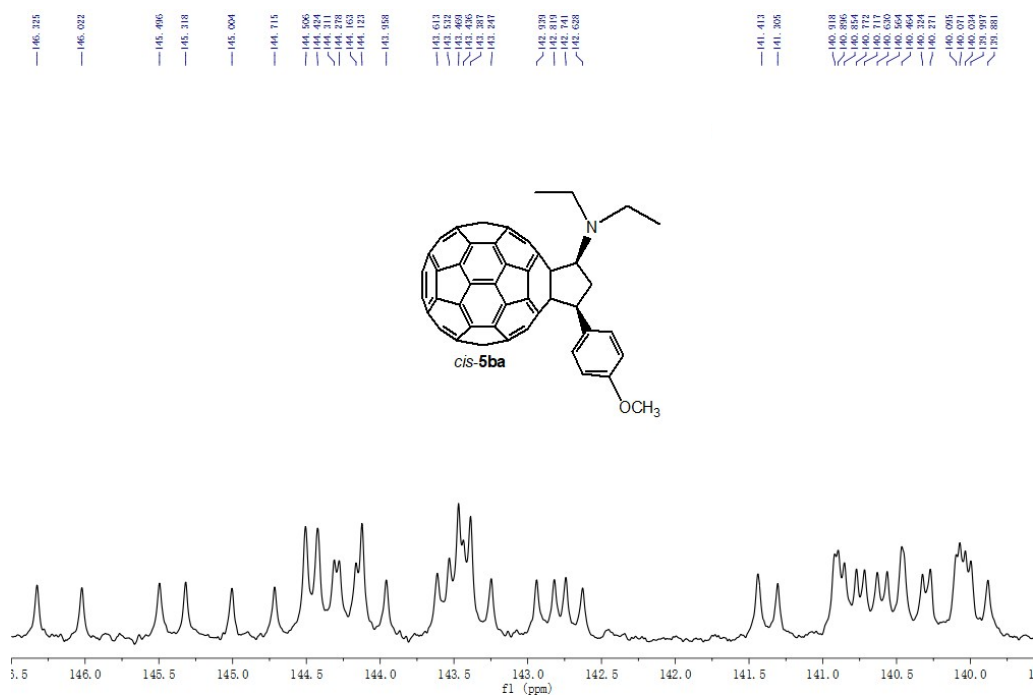

<sup>1</sup>H NMR (500 MHz, CS<sub>2</sub>/DMSO-*d*<sub>6</sub>) spectrum of compound *cis-5ca*

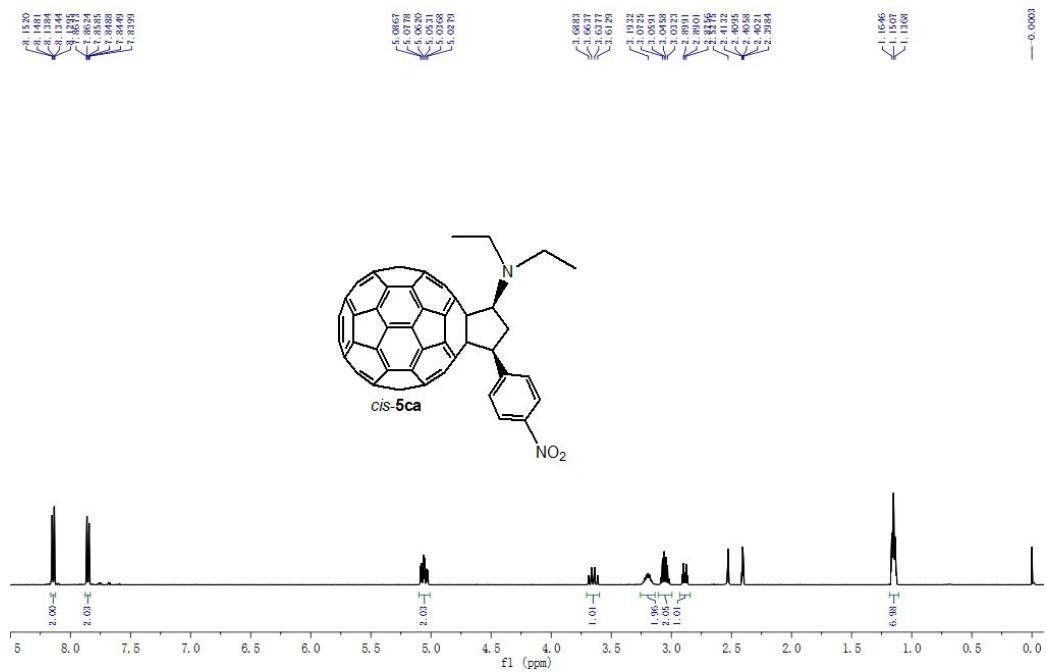

$^{13}\text{C}$  NMR (125 MHz,  $\text{CS}_2/\text{DMSO}-d_6$ ) spectrum of compound *cis-5ca*

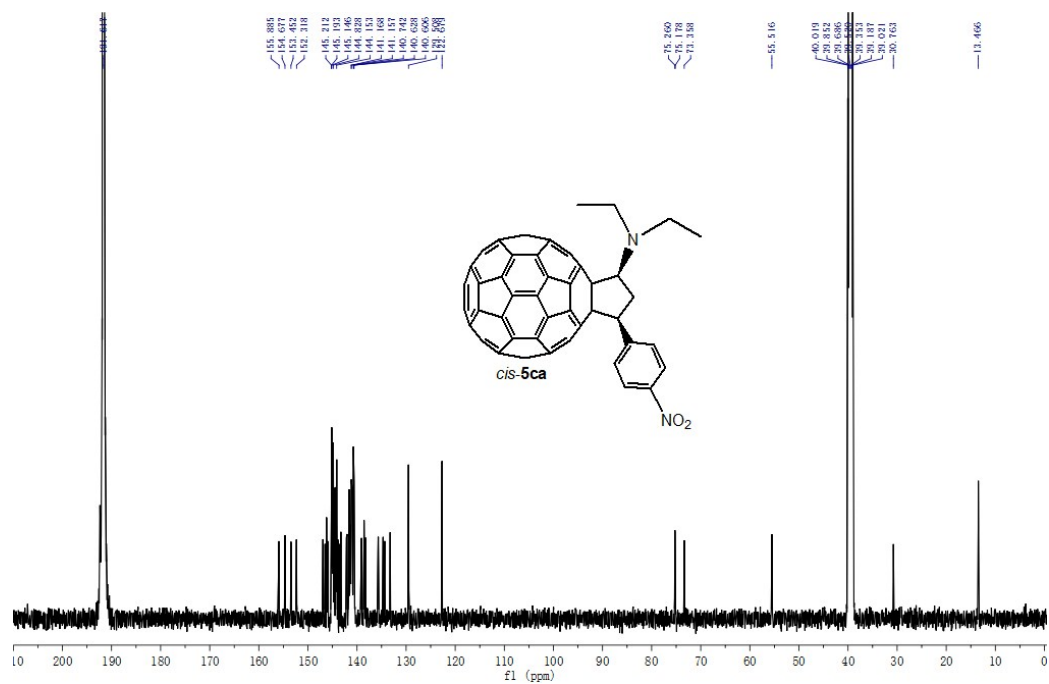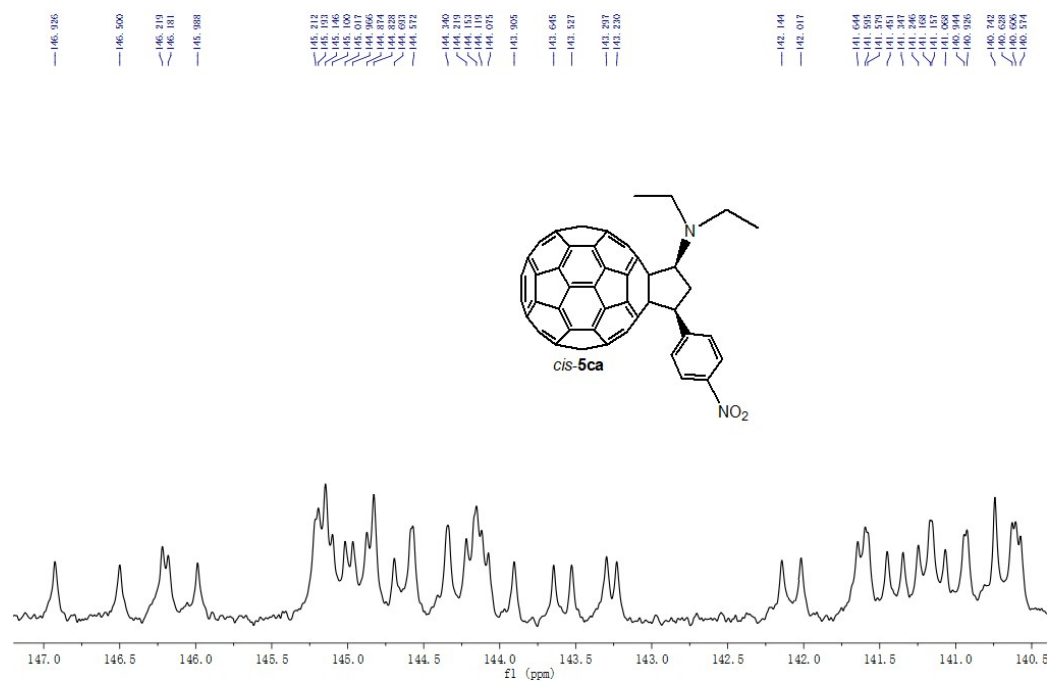

$^1\text{H}$  NMR (500 MHz,  $\text{CS}_2/\text{DMSO-}d_6$ ) spectrum of compound *trans*-6aa

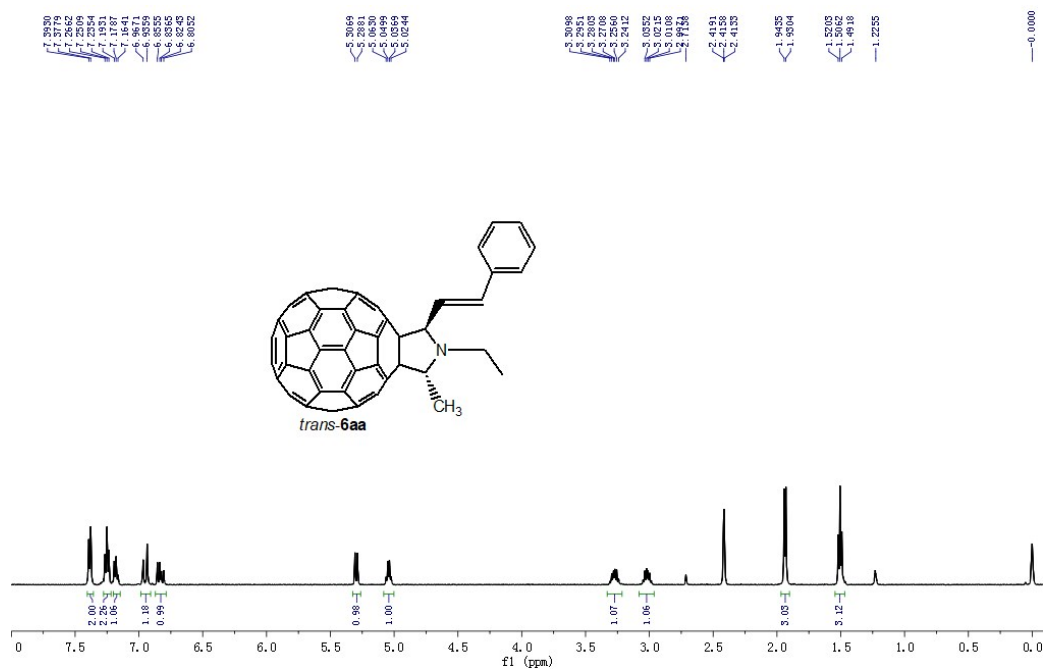

$^{13}\text{C}$  NMR (125 MHz,  $\text{CS}_2/\text{DMSO-}d_6$ ) spectrum of compound *trans*-6aa

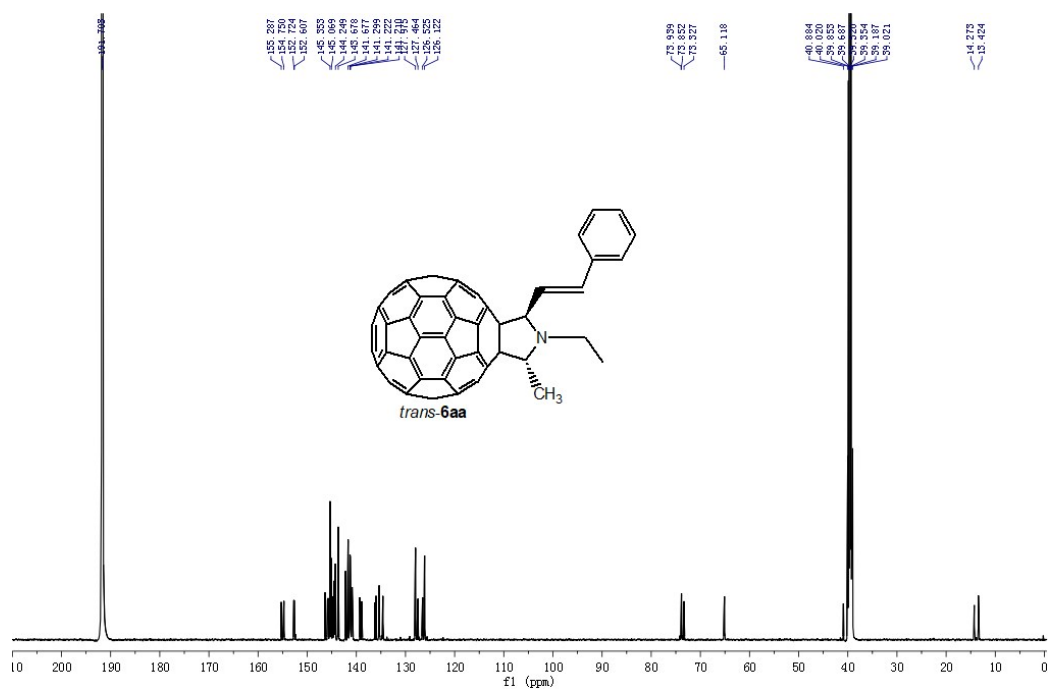

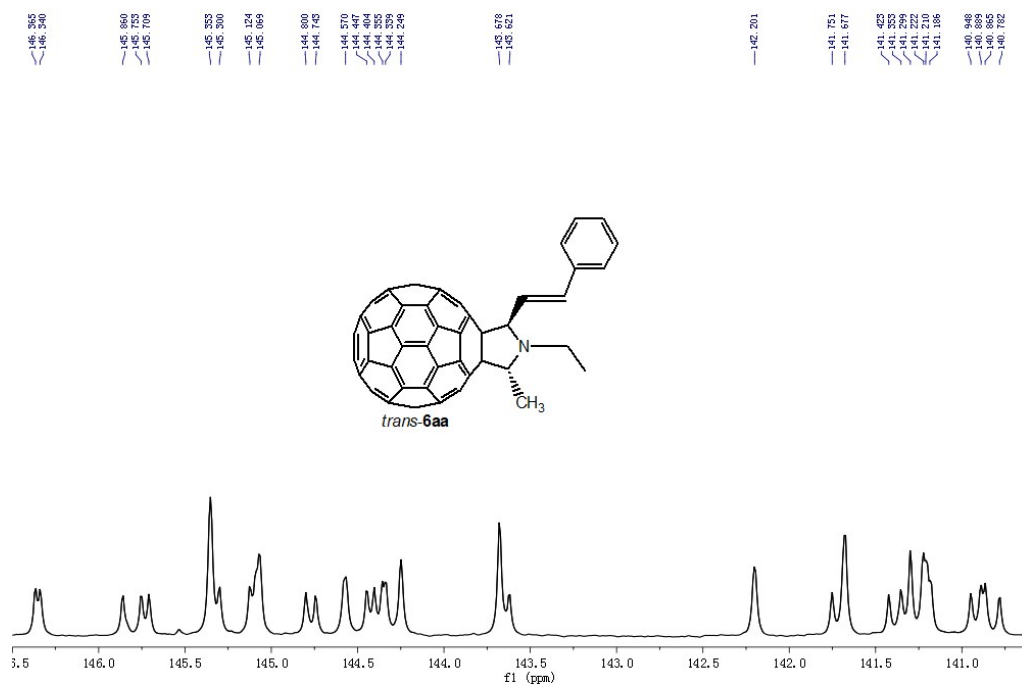

$^1\text{H}$  NMR (500 MHz,  $\text{CS}_2/\text{DMSO}-d_6$ ) spectrum of compound *trans-6ad*

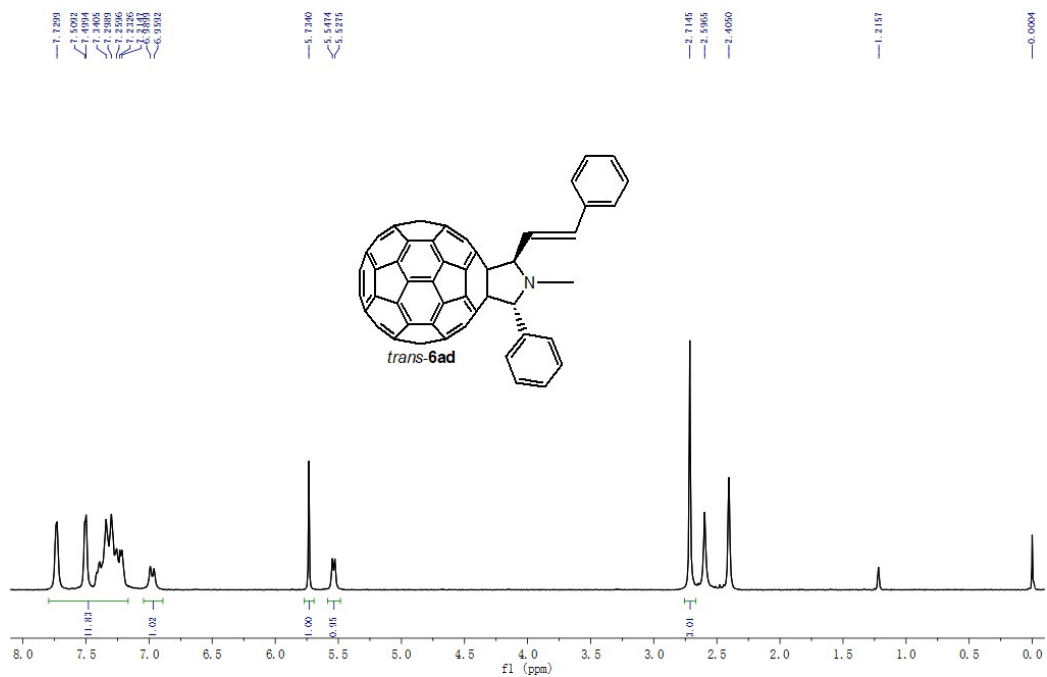

$^{13}\text{C}$  NMR (125 MHz,  $\text{CS}_2/\text{DMSO-}d_6$ ) spectrum of compound *trans*-6ad

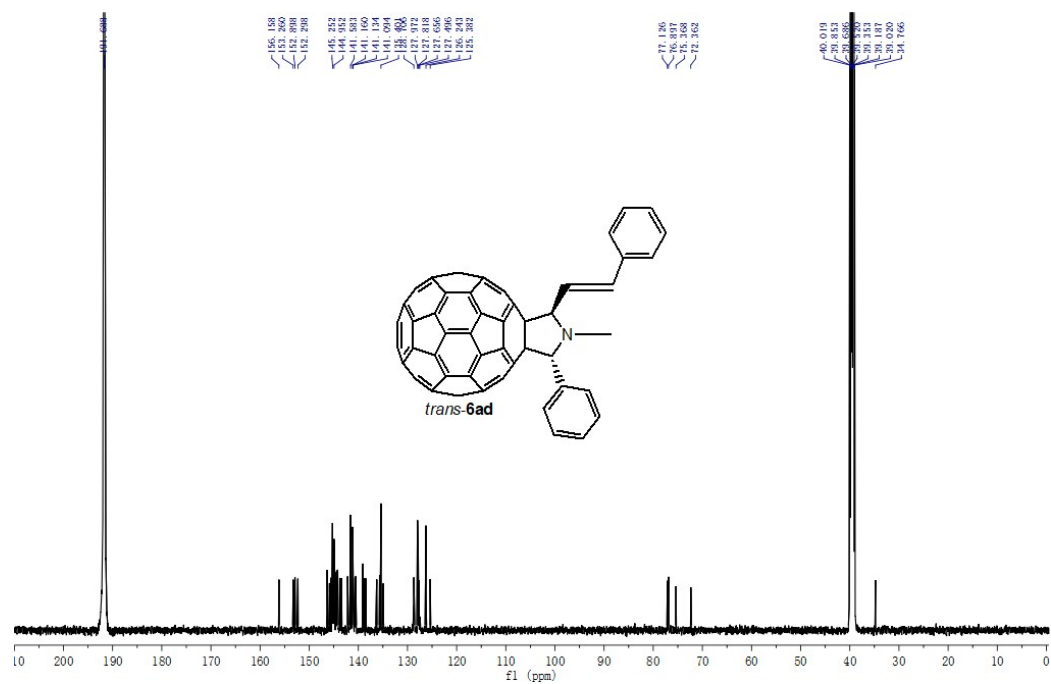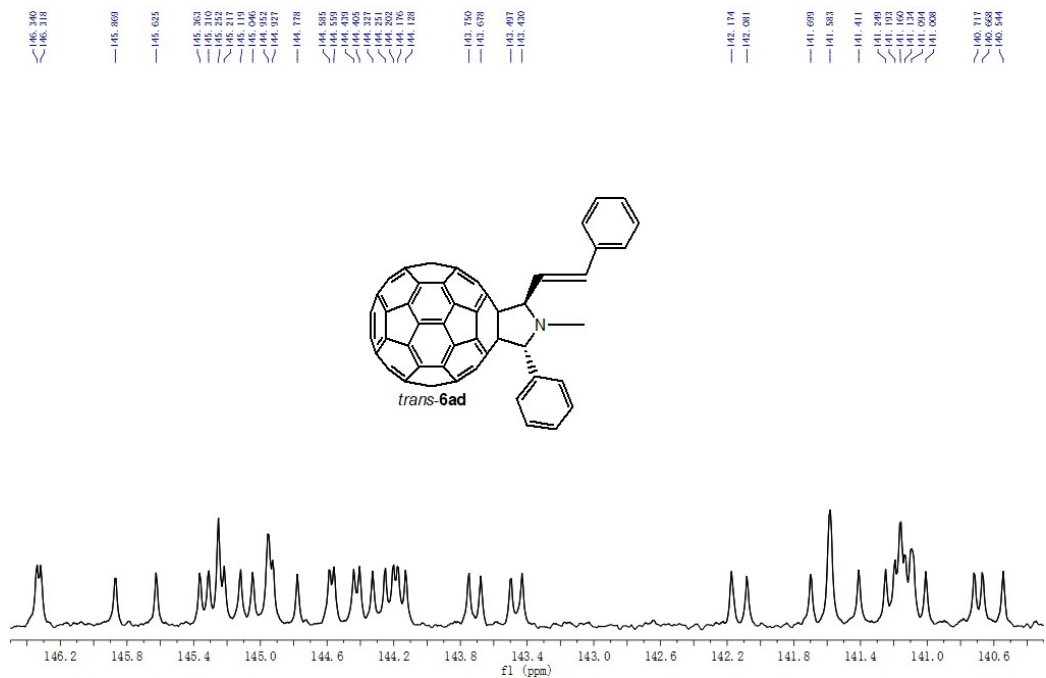

$^1\text{H}$  NMR (500 MHz,  $\text{CS}_2/\text{DMSO-}d_6$ ) spectrum of compound *trans-6ae*

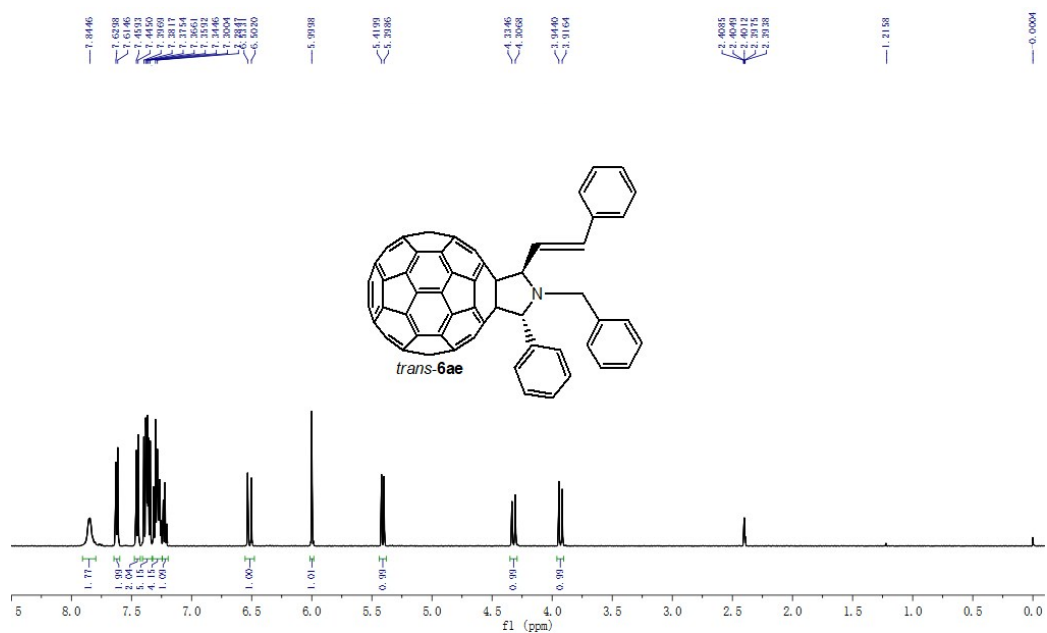

$^{13}\text{C}$  NMR (125 MHz,  $\text{CS}_2/\text{DMSO-}d_6$ ) spectrum of compound *trans-6ae*

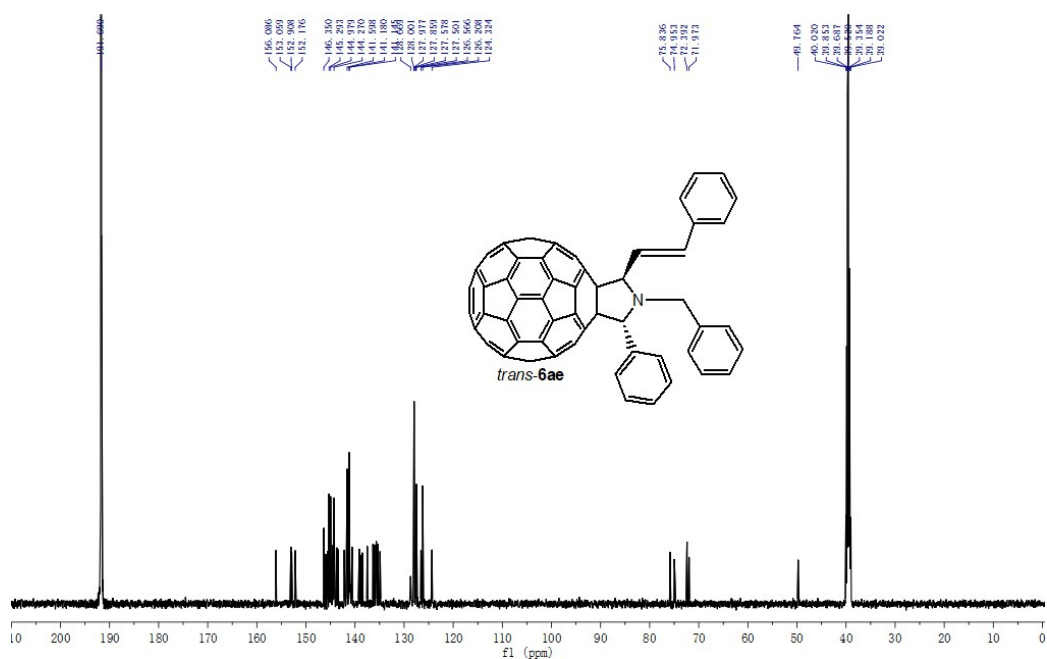

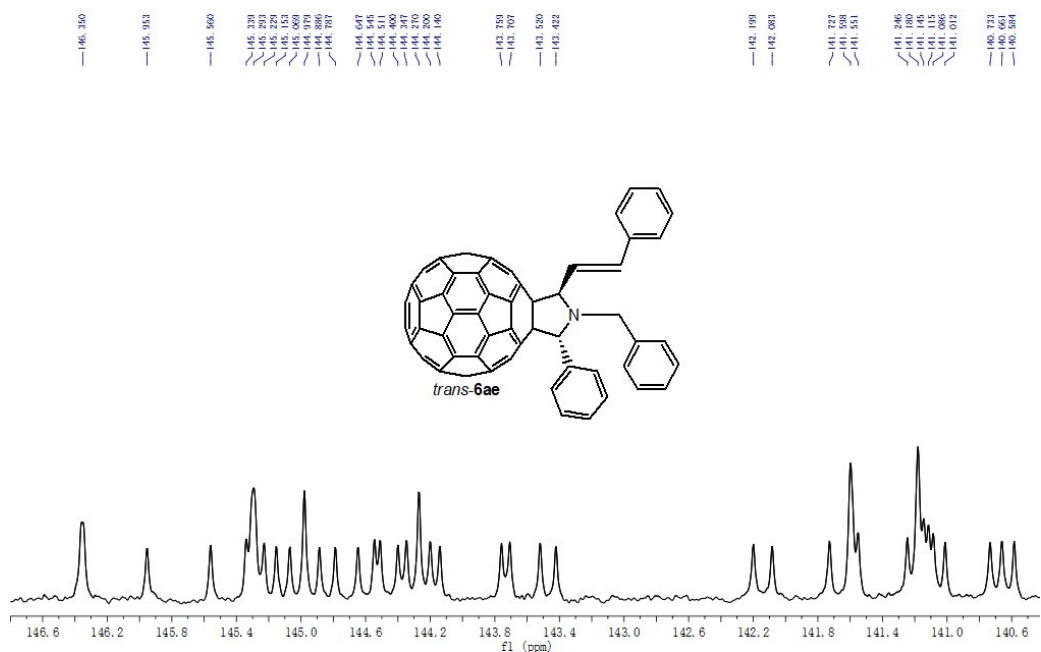

<sup>1</sup>H NMR (500 MHz, CS<sub>2</sub>/DMSO-*d*<sub>6</sub>) spectrum of compound *trans-6ca*

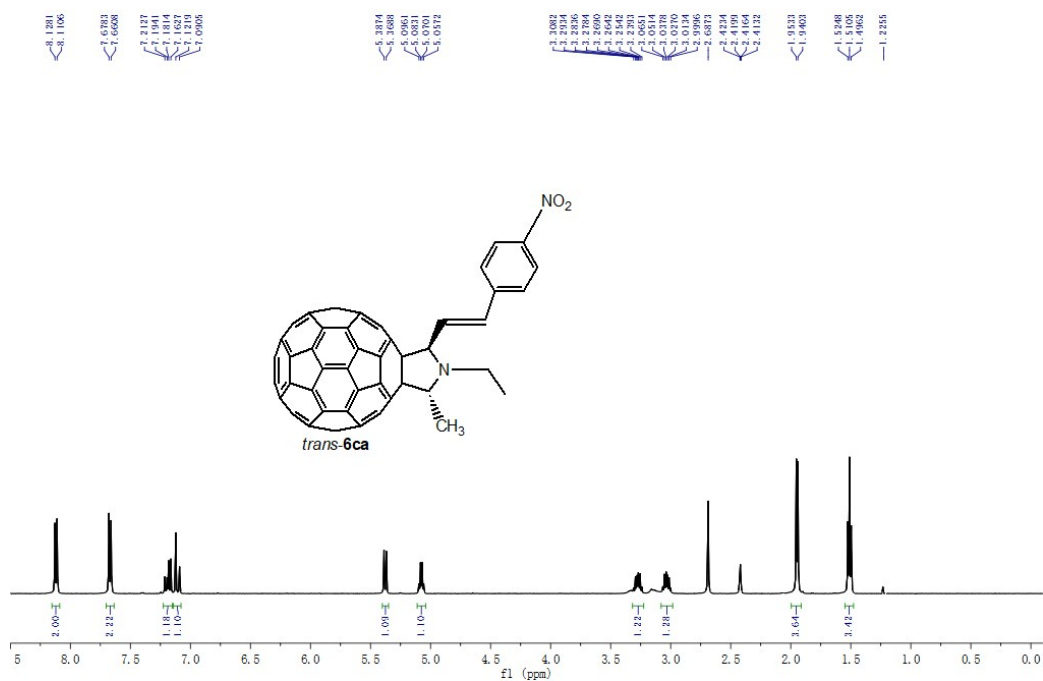

$^{13}\text{C}$  NMR (125 MHz,  $\text{CS}_2/\text{DMSO-}d_6$ ) spectrum of compound *trans-6ca*

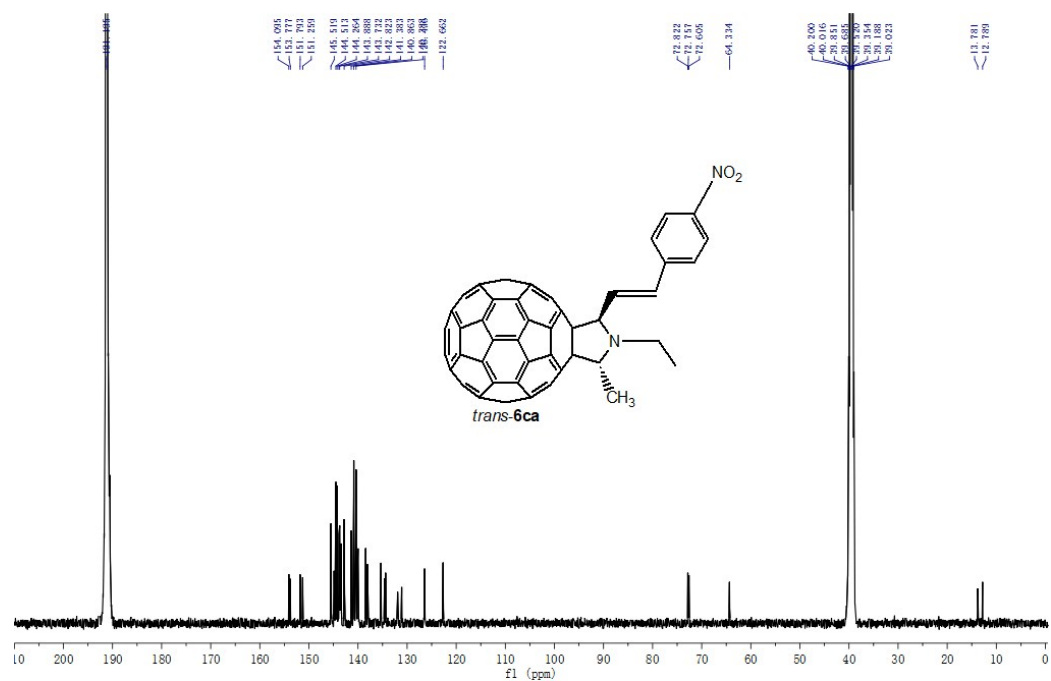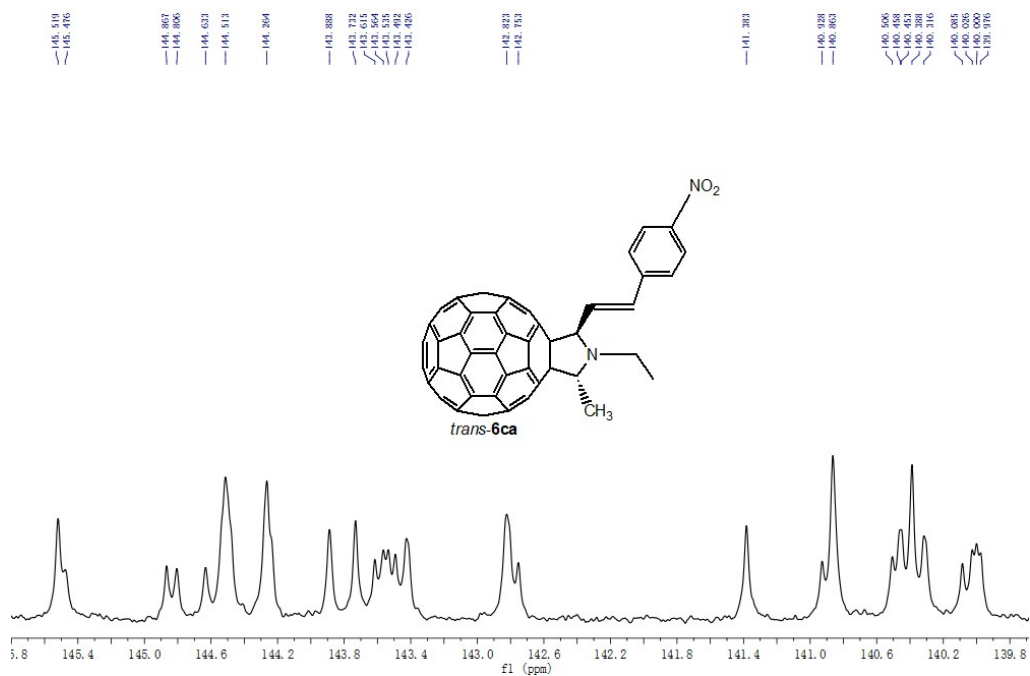



$^1\text{H}$  NMR (500 MHz,  $\text{CS}_2/\text{DMSO-}d_6$ ) spectrum of compound *cis-7*

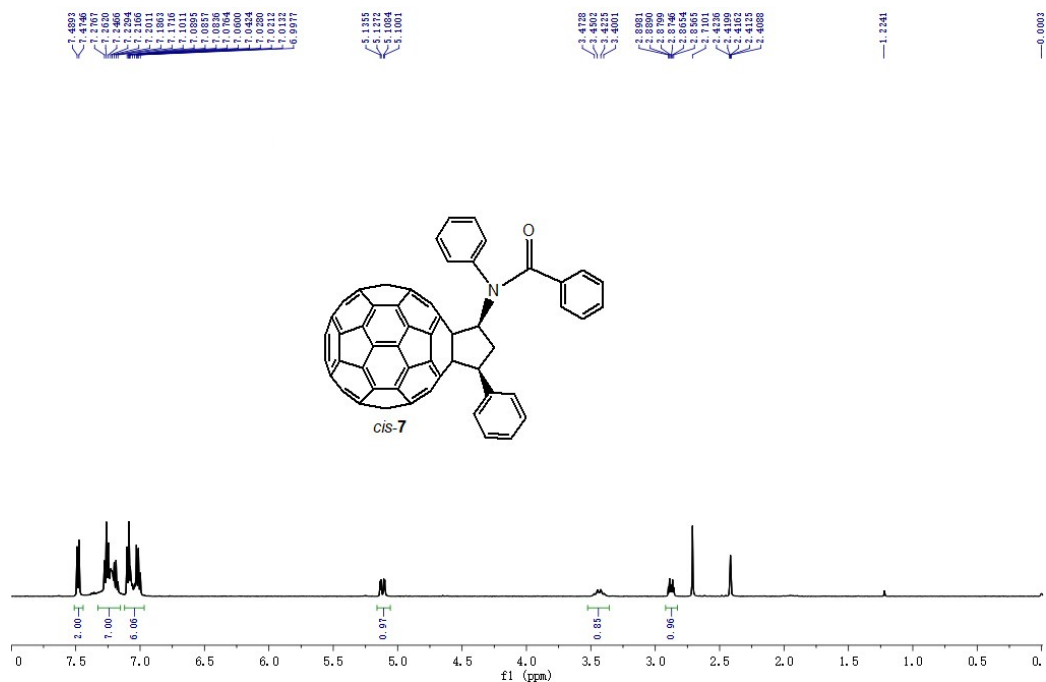

$^{13}\text{C}$  NMR (125 MHz,  $\text{CS}_2/\text{DMSO-}d_6$ ) spectrum of compound *cis-7*

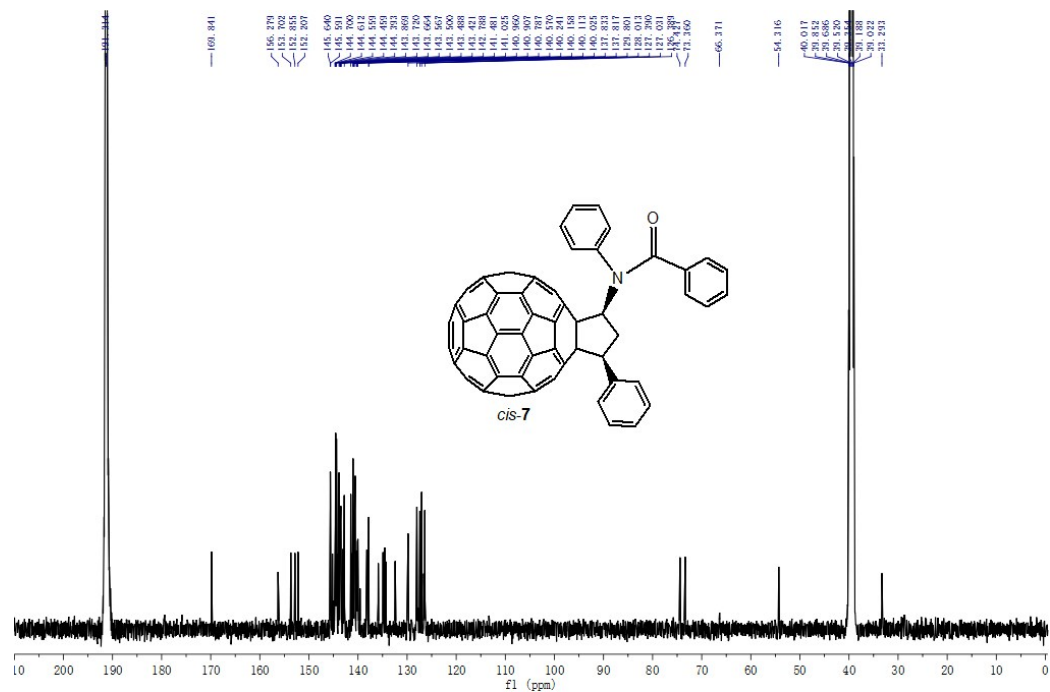

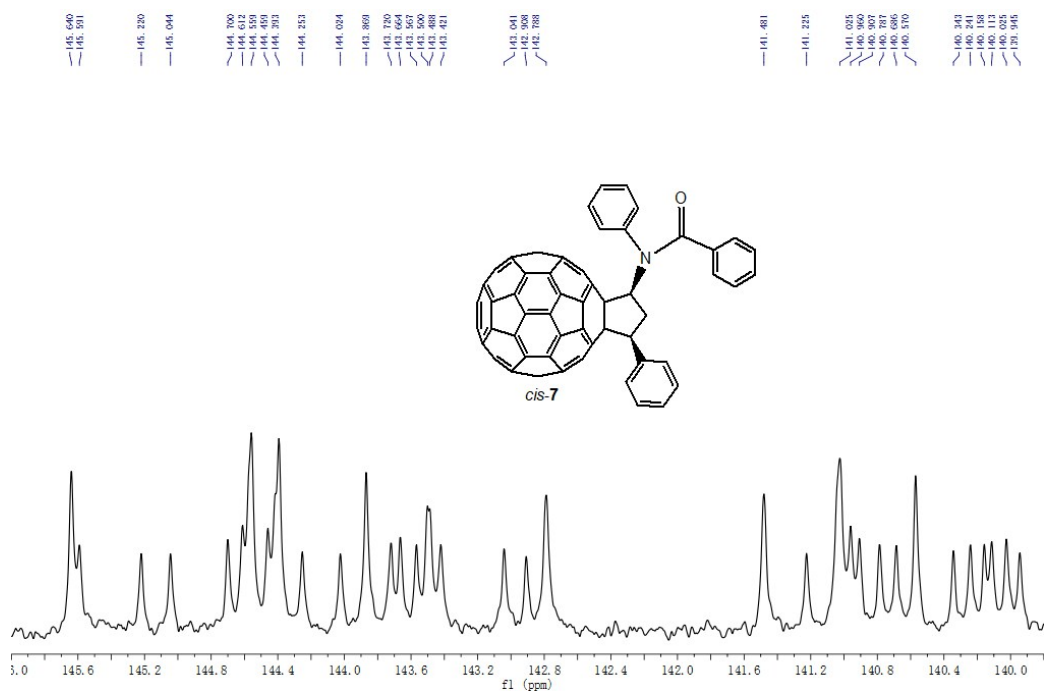

<sup>1</sup>H NMR (500 MHz, CS<sub>2</sub>/DMSO-*d*<sub>6</sub>) spectrum of compound *cis/trans-ortho-8*

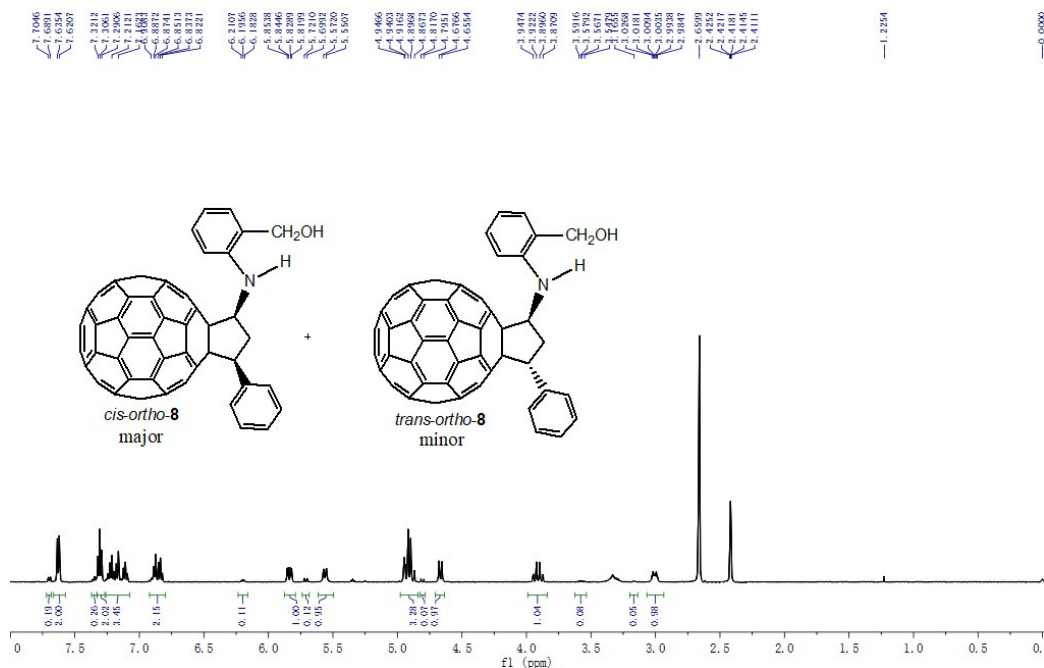

NOESY (500 MHz, CS<sub>2</sub>/DMSO-*d*<sub>6</sub>) spectrum of *cis/trans-ortho-8*

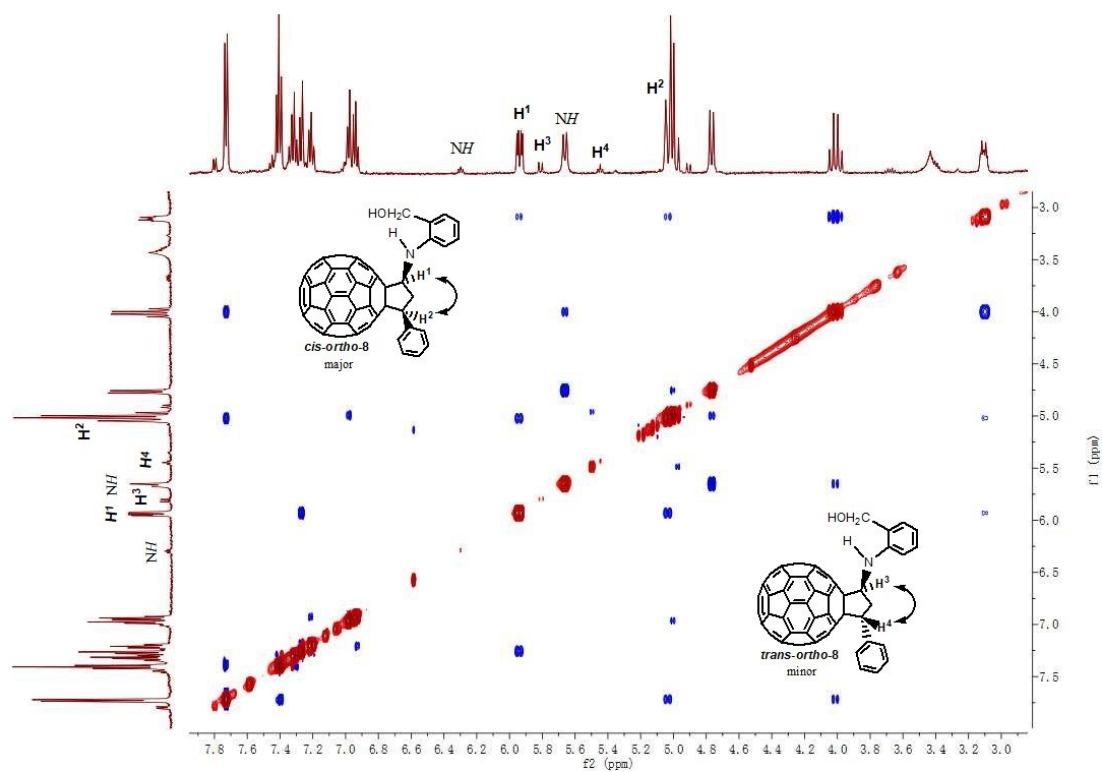

<sup>13</sup>C NMR (125 MHz, CS<sub>2</sub>/DMSO-*d*<sub>6</sub>) spectrum of compound *cis/trans-ortho-8*

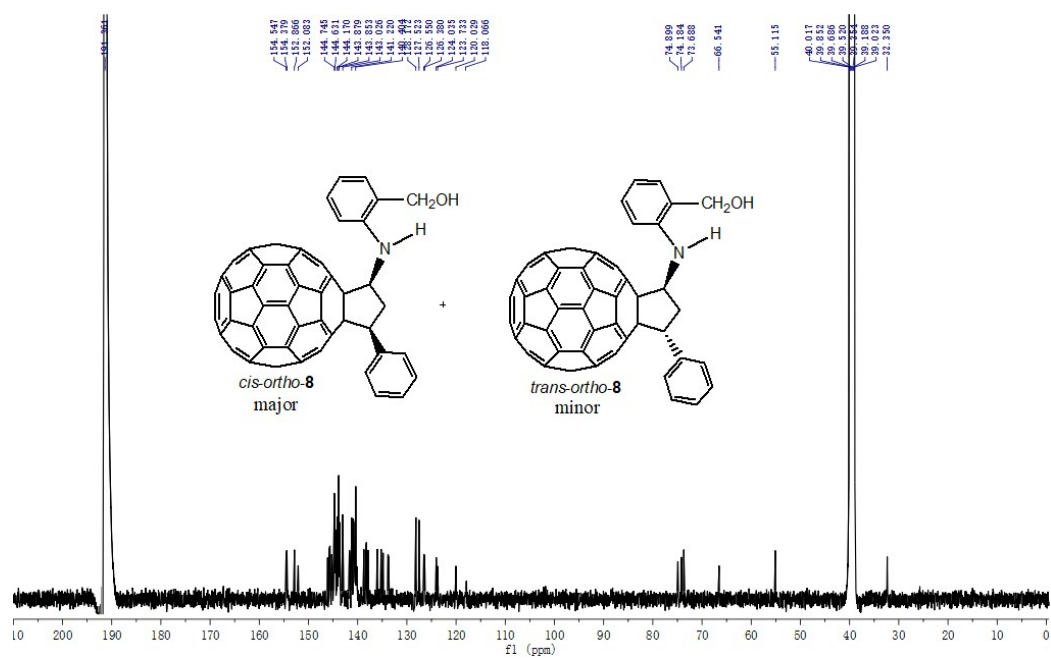

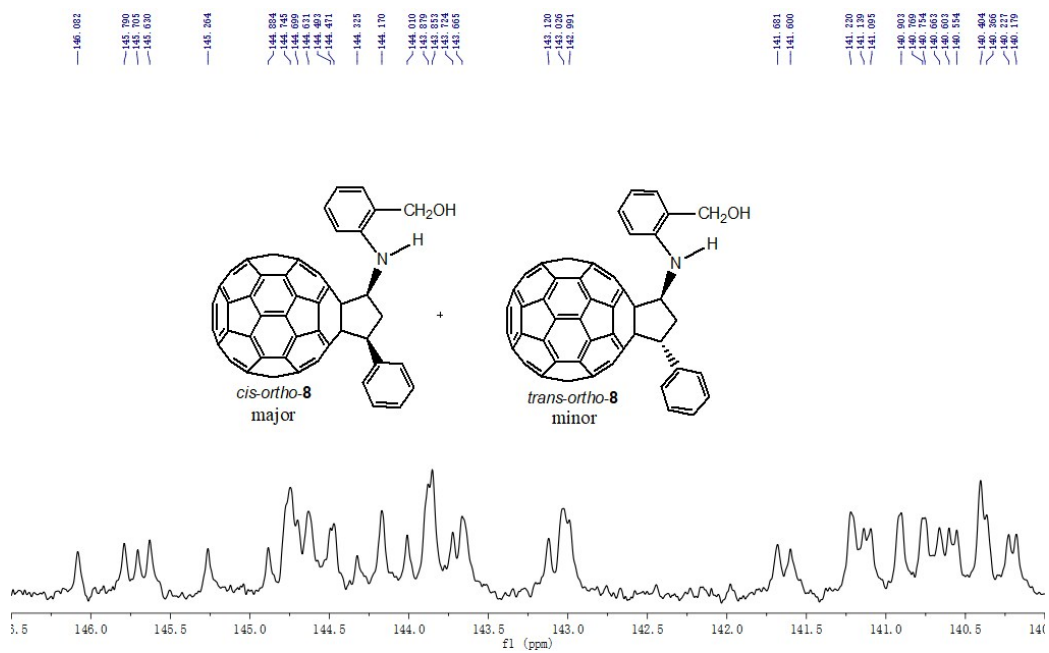

Supplement: c9ob02248a1.pdf [file c9ob02248a1.pdf]
